# Supplementary material for: Atmospheric Oxidation in the Presence of Clouds during the Deep Convective Clouds and Chemistry (DC3) Study
Source: Copernicus journal article supplement (doi:10.5194/acp-2018-120), 2018-03-26
Supplement: Supplementary file [file acp-2018-120-AC1-supplement.pdf]

## Response to Reviewer #1

We thank Reviewer #1 for useful comments. Below we answer the reviewer's concerns and make the necessary corrections to the paper and supplement. The reviewer's comments are in italics and our response in normal text.

### *General comments*

*The paper reports airborne observations of OH and HO<sub>2</sub> that were measured together with other trace gases and atmospheric parameters up to an altitude of 12 km during the DC3 mission over the central United States. The measured radical concentrations are compared to model calculations in order to test how well a photochemical box model can explain HO<sub>x</sub> in air close to deep convective clouds. In general, there is good agreement found between model results and measurements. Within the combined uncertainties, no significant difference is seen without and with heterogeneous chemistry using uptake coefficients for cloud particles consistent with laboratory findings. The data and the conclusions are convincing. The paper is well written and thematically suitable for publication in ACP.*

*Before publication, the following comments should be addressed.*

### *Major comments*

*1. Little if any information is provided on which organic compounds were measured during the flights. Were there other VOCs besides methane that made a significant contribution to the OH reactivity? Did isoprene play a role? This question is especially relevant in the outflow of convective clouds which can transport relatively short-lived species to higher altitudes in short time.*

We provide the table the reviewer requested, but believe that it belongs in the supplemental material. The paragraph in Section 2.4 has been modified to be

“Accurate measurements of other chemical species and environmental variables are critical for this comparison of measured and modeled OH, HO<sub>2</sub>, and OH reactivity. The photolysis frequency measurements are particularly critical for DC3 because of all the time spent flying around clouds and in the deep convection anvil. A list of these measurements is given in Table S1 and is summarized in Barth et al. (2015; 2016) and Pollack et al. (2016). The list of measured chemical species includes CO, CH<sub>4</sub>, N<sub>2</sub>O, NO, NO<sub>2</sub>, O<sub>3</sub>, organic nitrates, alkanes, alkenes, aromatics, aldehydes, alcohols, and peroxides.”

We also add a paragraph to the end of section 3.2 that reads

“According to the model calculations, CO contributes the most to the OH reactivity, with ~20% in the PBL and 30-40% aloft. Next is CH<sub>4</sub> at (5-10)%, HCHO at (5-10)%, O<sub>3</sub> at (2-10)%, and CH<sub>3</sub>CHO at ~5%. Isoprene was typically (1-2)%, except in some PBL plumes where it was as much as 60% and in some anvils where it was as much as 20% (0.1-0.5 s<sup>-1</sup>). The most significant ten chemical species were all measured and account for (60-70)% of the total model-calculated OH reactivity.”

2. In previous publications about airborne HO<sub>x</sub> studies, in which some of the authors of this paper were involved, systematic NO-dependent deviations between measured and modelled HO<sub>2</sub> were reported (e.g., Ren et al., JGR 113, D05310, 2008; Olson et al., JGR 111, D10301, 2006). In the present study, no such deviations are found (Fig. S3). Can the authors comment on this different findings?

We thank the reviewer for this observation. Figures 4 and (now) S4 show averages over NO bins, including all flights and altitude. If we plot one-minute HO<sub>2</sub> observed-to-modeled ratios for DC3 flights, the results are quite similar to those in Faloon et al. (1999) when re-evaluated by Olson et al. (2006). The substantial deviations observed during ground-based studies typically are not evident until NO exceeds 3 ppbv, which is the upper limit of NO for the data used from this DC3 study.

In the last paragraph in section 3.1, we have thus added the following text:

“The observed-to-modeled HO<sub>2</sub> ratio shows little evidence of a NO-dependence. The reanalysis of Olson et al. (2006) explains the NO-dependence of the ratio discussed in Faloon et al., (1999), and the NO-dependence observed often in ground-based studies is not evident until NO exceeds 3-5 ppbv. Because the highest NO mixing ratio encountered in DC3 was about 3 ppbv, we would not expect to see this effect in the DC3 results.”

3. Besides their possible role in heterogeneous chemistry, cloud particles can influence HO<sub>x</sub> through their impact on solar UV radiation that is driving photolysis. Though this may not be in the focus of the present paper, have the authors tried to quantify the impact of clouds on *j* values influencing HO<sub>x</sub>? It could be interesting to see a with-cloud / without-cloud (clear sky) ratio of HO<sub>x</sub> as a function of solar zenith angle extracted (if possible) from the data set.

We agree that this is an interesting study to do, but it not within the scope of this paper. However, we did a quick check on this idea by calculating the observed-to-modeled HO<sub>2</sub> ratio, filtering it for altitude bins (i.e., 5-8 km, 8-10 km, >10 km), and solar zenith angle bins (i.e., 50°-60°, 60°-70°, 70°-80°), and then plotting it as a function of *J*(O(<sup>1</sup>D)). In all cases, the ratio was constant as a function of *J*(O(<sup>1</sup>D)). This observation indicates that using the measured photolysis frequencies accurately captures the HO<sub>x</sub> production by photolysis as seen in Figure 4e.

*Minor comments*

*page 2, line 19 - 20: the production of RO<sub>2</sub> does not require NO; please correct.*

Corrected.

*page 2, line 22: add a half sentence, why the production of NO and O(<sup>3</sup>P) produces new ozone.*

The end of that sentence was rewritten as “...which then absorbs solar radiation to produce NO and O(<sup>3</sup>P), and O(<sup>3</sup>P) combines with O<sub>2</sub> to form new O<sub>3</sub>.”

*page 2, line 23: add a short explanation, why in the absence of NO the formation of OH and HO<sub>2</sub> destroys ozone.*

The end of that sentence as rewritten as “... acts to destroy ozone through OH production and the reactions O<sub>3</sub>+HO<sub>2</sub> and O<sub>3</sub>+OH.”

*page 3, line 17 and page 9, line 31: : typos; Kubistin.*

Fixed.

*page 6, lines 28 -32: how much is the limit of detection for OH and HO2 affected by scattered light from cloud particles?*

In Section 2, 2<sup>nd</sup> paragraph, we add the statement "... which reduces the measurement precision by as much as a factor of five."

*page 6, lines 23-25: the principle of the kOH measurement should be briefly explained in one or two sentences before equation (1) is presented. Alternatively, move equation (1) to page 7 between line 5 and 6.*

We added two sentences in the first paragraph in Section 2.3:

"It is directly measured by adding OH to the air flowing through a tube and then monitoring the decay of the logarithm of the OH signal as the reaction time between the OH addition and OH detection is increased. OH can also be lost to the tube walls, so the measured OH reactivity must be corrected for this wall loss."

*page 7, line 23: the sentence is not clear. How large was the temperature difference between ambient air and air inside the flow tube?*

This sentence has been rewritten as the following:

"Air entering the OHR flow tube was warmed by ~5°C at altitudes below 2 km to by as much as 75°C at 12 km."

*page 8, line 6: The table showing the measurements is missing. It should be presented in the main paper. Accuracies and time resolution of the measurements should be given.*

We have included Table S1 in the supplement, where we think it belongs.

*page 11, equation (3): how was k'OH calculated? Does it include VOCs (RH --> RO2 --> HO2), or only those species (e.g., CO, O3, HCHO) that directly yield HO2?*

We have removed this equation because the total OH reactivity calculated from the model was found by summing all the modeled loss rates and then dividing this number by the OH concentration for each time step. Every chemical species that was used to constrain the model or that was created by the model was used to find the model-calculated OH reactivity.

In Section 2.5, we revised the 7<sup>th</sup> paragraph on the modeled OH reactivity to be "OH reactivity was also modeled for comparison to observed OH reactivity. Modeled OH reactivity was calculated from the measured chemical species plus OH reactants that were not measured but were produced by the photochemical model. Examples of these additional OH reactants are organic peroxy, organic peroxides, and unmeasured aldehydes. The OH reactivity calculated from only the measured chemical species accounted for more than 90% of the total OH reactivity. Uncertainty in the modeled OH reactivity is estimated to be ±10%, 1σ confidence (Kovacs et al., 2001)"

*page 14, line 15: Fig. S8 ? References made in the main text to Figures S8, S9 and S10 should be checked and corrected*

Corrected



We thank Reviewer #2 for a careful review of this paper. Below we answer the reviewer's concerns and make the necessary corrections to the paper and supplement.

A possible concern of the reviewers is that we did not properly limit the conclusion of generally good agreement between model and measurement to the DC3 study. As the reviewer as pointed out, there are elements of the model that are quite uncertain. Therefore, the agreement between observed and modeled OH and HO<sub>2</sub> to within combined uncertainties suggests that, at this level of uncertainty, the atmospheric oxidation chemistry is understood. However, if the uncertainties could be reduced a factor of two or more, then this comparison could possibly uncover omissions or errors in the model chemical mechanism. We hope that Reviewer #2 is convinced of these statements.

We have modified the end of the abstract to read:

“Even with some observed-to-modeled discrepancies, these results provide evidence that a current measurement-constrained photochemical model can simulate observed atmospheric oxidation processes to within combined uncertainties, even around convective clouds. For this DC3 study, reduction in the combined uncertainties would be needed to confidently unmask errors or omissions in the model chemical mechanism.”

We have also rewritten the final paragraph in the Conclusion:

“Even with these observed-to-modeled discrepancies, the general agreement for observed and modeled OH and HO<sub>2</sub> suggests that current photochemical models can simulate observed atmospheric oxidation processes even around clouds to within these combined uncertainties. Reducing these uncertainties will enable comparisons of observed and modeled OH and HO<sub>2</sub> to provide a more stringent test of the understanding of atmospheric oxidation chemistry and thus to lead to an improvement in that understanding.”

We note that the photolysis frequencies were revised just after we submitted the manuscript. The changes in OH and HO<sub>2</sub> mixing ratios are small. Using the corrected photolysis frequencies, both OH and HO<sub>2</sub> are on average 2% larger, with only 5% of results giving differences greater than 15%, primarily at low solar zenith angles. On the figures in the manuscript, the differences are hardly perceptible. The merge file with the corrected photolysis frequencies was used for all the modeling done for this manuscript.

#### *Major comments.*

*The authors report short scattering signals by cloud particles which occur randomly both during online and offline measurements and discuss the treatment of the raw data to reduce the noise from these large scatter signals in section 2.2. Could the authors comment on whether this approach introduces any bias into the analysis, given that the online measurement period is 3 times longer than offline? The authors should provide a comment on the choice of exceeding the average background signal by four standard deviations. Would a different limit change the results?*

This approach is taken in order to maximize the ambient measurements of OH and HO<sub>2</sub>, allowing the possibility of higher frequency measurements, especially for HO<sub>2</sub>, without sacrificing any precision. The on-line and off-line signals are summed and then averaged, and because the averages are subtracted, this method introduces no bias. However, the signal-to-

noise ratio is actually better for the 15-5 versus the 10-10 configuration. For OH, the daytime on-line signal is typically  $10 \text{ cts s}^{-1}$  while the off-line signal is typically  $1 \text{ ct s}^{-1}$ . For 15-5, S/N is approximately  $145/\sqrt{150+5} = 11$  and for 10-10, S/N is approximately  $90/\sqrt{100+10} = 9$ . For HO<sub>2</sub>, the daytime on-line signal is typically  $100 \text{ cts s}^{-1}$  and the off-line signal is typically  $1 \text{ ct s}^{-1}$ , so that both S/N and data coverage are improved by using 15 s on and 5 s off.

The large scattering signals due to cloud particles can be as much as 100's of  $\text{cts s}^{-1}$ , but they occur randomly in any second. So averaging the on-line and off-line signals and then taking the difference does not introduce any bias. However, the difference signal gets rather noisy because cloud spikes can occur randomly and unevenly between on-line and off-line segments. We chose 4 standard deviations, but got the same results for OH and HO<sub>2</sub> to within 3% for OH and 4% for HO<sub>2</sub> for using the range of 2 to 6 standard deviations.

At the end of the 2<sup>nd</sup> paragraph in Section 2.2, we added

“Less than 3% of the data were removed. The overall results for OH and HO<sub>2</sub> vary less than 4% for filtering between two and six standard deviations.”

*On page 6, the OH and HO<sub>2</sub> interferences suffered by ATHOS are discussed and the authors state that interferences are only significant above forests and cities and are negligible outside of the planetary boundary layer. The authors should comment on whether this statement remains valid when sampling in and around convective clouds which can rapidly transport air from the surface. The correction applied to the HO<sub>2</sub> observations to account for RO<sub>2</sub> interferences is rudimentary and more details should be provided on the type of RO<sub>2</sub> species present. The correction will change with changing RO<sub>2</sub> species present and this relies on model predictions for RO<sub>2</sub> which is far from ideal.*

We agree that relying on the model to correct the HO<sub>2</sub> measurements is far from ideal. But while we have now had this capability for 5 years, we did not have it properly implemented for DC3 in summer 2012. However, as shown below, the effects are not large for most of the DC3 HO<sub>2</sub> values.

We have completely redone how we do the correction for the RO<sub>2</sub> interference in the HO<sub>2</sub> measurement. It now uses MCMv3.2.1 modeled RO<sub>2</sub> species inside the ATHOS detection flow tube. Knowing the flow through ATHOS, we calculate the concentration of the reagent NO, which was about  $3 \times 10^{13} \text{ cm}^{-3}$ . The reaction time was determined to be 3.7 ms, as verified by the HO<sub>2</sub> conversion rate measured in the laboratory. These values were put into the model and the RO<sub>2</sub>-produced HO<sub>2</sub> interference was calculated for each one-minute time step. Ambient HO<sub>2</sub> was then determined by subtracting this modeled HO<sub>2</sub> interference from the measured HO<sub>2</sub>. The HO<sub>2</sub> correction is now slightly different from the previous correction at all altitudes.

Section 2.2, 4<sup>th</sup> paragraph. We revise the text as

“For HO<sub>2</sub>, the correction method uses more than 1000 RO<sub>2</sub> chemical species modeled by MCMv3.3.1 and assumes that they are ingested into the detection flow tube without any wall loss. The model then calculates the resulting OH, which is what would be detected as HO<sub>2</sub>. The calculated concentration of reactant NO is  $\sim 3 \times 10^{13} \text{ cm}^{-3}$  and the reaction time was determined to be 3.7 ms, as verified by the HO<sub>2</sub> conversion rate measured in the laboratory. This calculation was repeated for each one-minute time step and this calculated interference was then subtracted from the observed HO<sub>2</sub>, resulting in the HO<sub>2</sub> values reported here. Observed HO<sub>2</sub> was reduced by an average of 2%, with some peaks, both in the PBL and aloft, where it was 10%. Because the model RO<sub>2</sub> mechanisms are uncertain, the uncertainty for this correction is estimated to be a factor of 2, which increases the absolute uncertainty for HO<sub>2</sub> from  $\pm 16\%$  to  $\pm 20\%$ ,  $1\sigma$  confidence.”

*Pg 12, section 3.3: Why was HONO photolysis not considered for OH production?*

We have added OH production by HONO photolysis and OH loss by OH+NO+M to Figure S11. The reason we did not include them before is that the OH production by HONO almost exactly balances the OH loss by HONO formation at all altitudes, which implies that surface HONO production is not important for DC3, even in the PBL. Because there is so little HONO down low, the HONO above 8 km is likely formed from *in situ* OH reactions with lightning or stratospheric NO. Thus HONO seems to be acting more as a HO<sub>x</sub> reservoir than a HO<sub>x</sub> source.

We add the following sentence to the last paragraph of section 4.1:

“HO<sub>x</sub> production by HONO photolysis essentially balances HO<sub>x</sub> loss by HONO formation.”

*On page 14 the authors calculate P(O3) from the ‘observed HO2 + modelled RO2’ and from ‘modelled HO2 + modelled RO2’ and compare to the ‘observed O3 change’. Lines 16 and 17 state that HO2 accounts for a little more than half the total O3 production, but then lines 21 – 23 state that the observed O3 change was equal to 14 ppbv and the P(O3) calculated from the observed HO2 was 14 ppbv (figure 9 seems only to show P(O3) calculated using HO2)? What was the contribution of modelled RO2 to P(O3)? Are the authors suggesting that roughly half of the ozone produced partitions to NO2? Could the change in NO2 over the flight leg be shown to corroborate this?*

We assumed erroneously that the reader would know that we added the modeled RO2 to the observed or modeled HO2 to calculate the ozone production rate. The modeled RO2 is always included in the calculated P(O3) for the two cases, one using modeled HO2 and the other using measured HO2. In no case do we determine P(O<sub>3</sub>) from HO<sub>2</sub> alone. We make this clear by adding the words “and modeled RO2” to every figure and every case that we talk about P(O<sub>3</sub>).

Section 3.5, 4th paragraph, we also add the following sentence to make it clear that these two RO<sub>2</sub> chemical species are the most important in this calculation:

“Modeled RO<sub>2</sub> is primarily CH<sub>3</sub>O<sub>2</sub> and CH<sub>3</sub>CHO<sub>2</sub> above 5 km.”

*Minor corrections*

*Pg 2, lines 17 – 20: Reads as though nitric oxide is needed to produce RO2 and HO2 from OH oxidation of VOCs, this isn’t the case.*

Thanks for pointing out this poor wording. We have corrected this wording, removing “and in the presence of nitrogen oxides,” and replaced it with “including”

*Pg 3, lines 9 – 11: HO2 interferences in LIF systems can now be minimised, however, this sentence suggests that HO2 measurements are still affected by interferences. This needs to be corrected.*

Corrected. Please see above in major comments.

*Pg 4, lines 1 – 2: I find this sentence confusing as metal ions enhance the HO2 uptake probability rather than reduce it.*

We have rewritten the 7<sup>th</sup> paragraph in the Introduction as

“Laboratory studies show that the HO<sub>2</sub> effective uptake coefficient on moist aerosol particles that contain copper is probably much less than 0.01 in the lower troposphere but may be greater than 0.1 in the upper troposphere (Thornton et al., 2008). However, other laboratory studies show that adding organics to the particles or lowering the relative humidity can reduce uptake coefficients (Lakey et al., 2015; Lakey et al., 2016). These values are generally lower than the HO<sub>2</sub> effective uptake coefficient assumed in global chemical transport models.”

*Pg 5, line 15: ‘lower’ than what?*

Corrected. It should be “low”.

*Pg 5, line 21: Provide the concentration of NO that is added.*

We add this in the last paragraph in section 2.2. It was  $3 \times 10^{13} \text{ cm}^{-3}$ .

*Pg 9, line 14 & 15: Surface area is not a concentration. Please include the mean surface area.*

The units show that it is not a surface area either, which would be simply  $\text{cm}^2$ . It is a mean surface area per  $\text{cm}^{-3}$  of air, as is used in Seinfeld and Pandis. We will make this change throughout the manuscript. Also, it is not the mean surface area per  $\text{cm}^{-3}$  of air, but instead is the total surface area per  $\text{cm}^{-3}$  of air. We do find the mean particle radius though.

*Pg 9, line 24: Which organic peroxy radicals + OH reactions does the model include?*

We suspect that the reviewer knows very well that MCMv3.3.1 does not include the RO<sub>2</sub>+OH reaction. When we include this reaction for CH<sub>3</sub>O<sub>2</sub> and C<sub>2</sub>H<sub>5</sub>O<sub>2</sub>, as in Assaf et al., (EnvSci.Tech, 51, 2017), we get results that are a few percent different from not including these reactions. We have added a paragraph at the end of section 2.5 to describe how we did this modeling:

“The model was run 27 times to test the sensitivity of the calculated OH and HO<sub>2</sub> to different factors. First, the chemical mechanism was expanded to include the reactions of CH<sub>3</sub>O<sub>2</sub>+OH and C<sub>2</sub>H<sub>5</sub>O<sub>2</sub>+OH (Assaf et al., 2017), and in some cases, reactions of OH with the next 300 most significant RO<sub>2</sub> species that comprise 95% of the modeled RO<sub>2</sub> total, assuming a reaction rate coefficient of 10-10  $\text{cm}^3\text{s}^{-1}$ . Adding the measured reactions decreased OH by ~1% (5% maximum) and increased HO<sub>2</sub> by <1% (15% maximum); adding the additional the assumed reactions changed modeled OH and HO<sub>2</sub> by less than 3%. Second, the decay time of the unconstrained modeled oxygenated intermediates was varied from 6 hours to 5 days. The resulting modeled OH and HO<sub>2</sub> varied by ~10% over this range. This decay time serves as a proxy for surface deposition in the planetary boundary layer as well as for recently measured rapid reactions of highly oxidized RO<sub>2</sub> + RO<sub>2</sub> to form peroxides (Bernt et al., 2018). This decay time is highly uncertain. The mean of the model runs using decay times of 6 hours, 1 day, and 5 days and using the model mechanism including CH<sub>3</sub>O<sub>2</sub>+OH and C<sub>2</sub>H<sub>5</sub>O<sub>2</sub>+OH was used for the comparisons to the measurements.”

*Pg 11, E3: k'OH should be defined absolutely. Does it just include OH + CO and OH + HCHO that lead to HO2 directly or are VOC reactions that cycle to HO2 via RO2 considered too? If it is the latter, the authors should comment on the validity of this approximation under low NO conditions.*

The reviewer has pointed out the well-known difficulties with this simple relationship. We do not use this approximation but wanted to include this expression in the paper to illustrate that the ratio is increased when the OH reactivity is higher and decreased when NO is higher. We remove it.

*Pg 11, line 20: Is this ratio from measurements or the model?*

We clarify this by changing this sentence to the following:

“Both the observed and modelled HO<sub>2</sub>/OH ratios are greater than 100 below 4 km and fall to less than 10 at 12 km (Fig. S2).”

*Pg 11, line 22: what is the uncertainty limit?*

We add the following:

“... (1σ confidence) of a factor of 1/1.4 to 1.4.”

Using this uncertainty limit is valid because we estimate that about half the uncertainty for OH and HO<sub>2</sub> comes from factors that are common to both calibrations while the other approximate half comes from factors that are specific to each measurement. For instance, both are affected the same by the uncertainty in the lamp flux of the calibration system, but their uncertainties related to laser power monitoring in the two different axes and to developing a fit to the calibration data are unique to the OH and HO<sub>2</sub> measurements.

*Pg 11, line 27: ‘factor of 600 for JO(1D), a factor of 100 for NO..’ it is not clear from these statements the range of photolysis rates or concentrations over which the model agrees with the observations. I suggest providing the range in the text.*

We have modified the text as recommended to read the following:

“In general, measured and model OH and HO<sub>2</sub> agree from 2x10<sup>-6</sup> s<sup>-1</sup> to 7x10<sup>-5</sup> s<sup>-1</sup> for JO(1D), from 2x10<sup>-3</sup> ppbv to 7x10<sup>-1</sup> ppbv for NO, from 40 ppbv to 100 ppbv for O<sub>3</sub>.”

*Pg 11, line 28: ‘One exception is OH for NO greater than 1 ppbv..’ Are the observations greater or less than the model in this case?*

This sentence has been removed as it is not essential.

*Pg 12, line 3: Please provide the limit of detection here.*

We add the sentence:

“for 20-second measurements is estimated to be about 0.6 s<sup>-1</sup>, which means that most OH reactivity measurements were at or below the limit-of-detection.”

*Pg 12, line 7: ‘modeled OH reactivity looks quite similar..’ Could % differences or differences in s-1 be given here?*

We change this sentence to the following:

“... but for the entire altitude, the difference between the observed and modeled OH reactivity is 0.2 s<sup>-1</sup> larger for the modelled OH reactivity at OHR flow tube conditions than for the modelled OH reactivity at ambient conditions, a difference that is swamped by the noise in the observed OH reactivity.”

*Pg 12, line 8: what loss rate is assumed for the model generated intermediates?*

In the free troposphere, the deposition loss of model-generated intermediates is probably several days, since their loss rate depends on their deposition. Some may be taken up in cloud drops, in which case their loss rate would be much faster. We do not know for certain which case is true. Therefore, the modeled values we report come from an ensemble of models, the decay frequencies are varied from  $2 \times 10^{-6} \text{ s}^{-1}$  (6 hours) to  $5 \times 10^{-5} \text{ s}^{-1}$  (5 days). How we handled this in the modeling is described in the new last paragraph in section 2.5, Photochemical Box Model.

*Pg 13, line 22: 'substantial agreement' – could this be given as a % agreement?*

We have rewritten this paragraph as the following:

“In Figures 2-4 and S6-S7 and Tables 1 and S1, the no-het and het models agree with the observed OH and HO<sub>2</sub> to within the combined uncertainties, with the exception of the het model for HO<sub>2</sub> when the aerosol surface area per cm<sup>3</sup> of air was greater than  $10^{-6} \text{ cm}^2 \text{ cm}^{-3}$ . In that case, the ratio of the observed-to-modeled HO<sub>2</sub> was too large, indicating that the het model was reducing HO<sub>2</sub> too much. On the other hand, the difference between the observations and hetmax model is greater than the uncertainty limits in almost every comparison. When the OH observed-to-modeled ratio is plotted as a function of aerosol surface area (Fig. 7), the no-het model gives a better agreement with the observations as a function of surface area than the het model does. For HO<sub>2</sub>, the difference between the het model and the observations exceeds the combined uncertainty limits when the aerosol surface area per cm<sup>3</sup> of air exceeds  $10^{-6} \text{ cm}^2 \text{ cm}^{-3}$ .

*Pg 13, line 29: provide figure number.*

Done.

*Pg 14, line 1: What was recalibrated in the instrument? The phototube? The authors should comment on why they think it is appropriate to apply a calibration performed so long after the campaign.*

Looking back through the notes for DC3, we noticed that the procedure had not been followed completely and that the transmission of the window between the calibration lamp and the calibration flow tube, which is 0.86, had not been included in the calibration. We re-measured the window transmission and confirmed that it was still 0.86 and then applied this number to the OH and HO<sub>2</sub> calibration.

*Pg 14, E3: should be E4. Also, please define L(O3) in the text.*

Since we removed Equation 3, this equation is now E3 again.

*Pg 16, line 1: ‘..HO2 calibration at low pressure was in error’ wasn’t a calibration over a range of pressures performed?*

For ATHOS, OH and HO<sub>2</sub> are always calibrated over a range in pressure that extends from a lower pressure than encountered in flight to a higher pressure than encountered in flight. For our instrument, the calibration has the shape similar to a Plank distribution of spectral irradiance – it rises steeply on the low pressure and then decreases more slowly on the high pressure end.

Thus, the lower pressure end is the most difficult to calibrate because small errors of even 5% in the calibrations numbers can lead to large errors in the fitted calibration curve.

*Pg 16, line 9: during which campaign was the fire plume observed?*

The fire plume was encountered on 22 June, day-of-year 174. In Figure S1, the encounter took place near the end of day 174, when the DC-8 dipped down in altitude. The SZA was well above 85°. so OH was quite low.

We modified this sentence to read

“A spike in excess of 5 ppbv hr<sup>-1</sup> was found in a fire plume on 22 June (day-of-year 174), where abundances of both VOCs and NO<sub>x</sub> were enhanced.”

*Pg 16, line 21: add ‘3’ after ‘DC’*

Fixed

*Pg 16, line 26 – 27: My understanding of the Whalley et al, 2015, mountaintop cloud study was that the uptake coefficient reported was determined from the observed decrease in the measured HO<sub>2</sub> and was not calculated from the size, composition, etc of the aerosol/cloud droplet as is suggested in lines 26 and 27. The authors should compare the uptake coefficients determined rather than the level of decrease in HO<sub>2</sub> given the very different surface areas encountered in the different campaigns.*

We have fixed this issue, as shown in the answer to the next reviewer comment.

*Pg 16, line 28: ‘small cloud impacts on HO<sub>2</sub> are consistent..’ this statement is at odds with the comment in the Introduction (pg 3, lines 19 – 22) which states that an observed to modelled ratio of 0.65 was reported during the in-cloud measurements in Olson et al (2006). Please clarify.*

We are now clearer on the distinction between measurements of HO<sub>2</sub> uptake on ice particles versus liquid cloud particles.

We have rewritten Section 4.2, 2<sup>nd</sup> paragraph as

“In DC3, the DC-8 spent hours flying in anvils of the cumulus clouds, which consisted of ice particles. DC3 provides evidence that the HO<sub>2</sub> uptake on ice is small. These results are consistent with HO<sub>2</sub> results over the western Pacific Ocean (Olson et al., 2004) but not with those over the northern Atlantic (Jeanglé et al., 2000). In Mauldin et al. (1998), a large difference between the observed and modeled OH was found in clouds, but this difference may have been due to the lack of photolysis frequency measurements, which are crucial to test photochemistry in a cloudy environment. In DC3, the DC-8 spent essentially no time in liquid clouds, for which there is evidence of measurable HO<sub>2</sub> uptake (Olson et al., 2006; Whalley et al., 2015). Thus these DC3 results provide constraints of HO<sub>2</sub> uptake on aerosol and ice particles, but not on liquid water particles.”

*Pg 17, lines 9 – 11: was data missing when the model and measurements diverge?*

This is a good point. The answer is “no”. The 10% of the time that all the constraining measurements are simultaneous show the same amount of agreement and discrepancy as the entire data set.

*Pg 17, line 23: remove ‘strong’.*

Removed in the rewrite of this paragraph.

*Figure 6: the dots representing ‘obs loss’ and ‘obs prod’ are very difficult to distinguish from each other. I suggest more contrasting colours are used. The modelled loss should be added to this figure too.*

Done. Model loss is identical to model production, so to the figure caption we have added the sentence

“Model OH production and loss are equal.”

*Figure S1 highlights the disagreement between OHRobs and OHRmod. If the modelled OHR was forced into agreement with the OHR observed, how would this impact the modelled OH (and the level of agreement with OH observed)?*

For DC3, the observed OH reactivity is significantly greater than the limit-of-detection only below 2 km altitude. The largest plumes, with OH reactivity exceeding  $5 \text{ s}^{-1}$ , are generally over forests, where the OH measurement is known to suffer from an interference. Not that much time was spent flying over forests. So for these DC3 results, we do not think that this exercise would be instructive.

*Figure S1 – S6: The fitted line should be added to the OHR scatter plots.*

This fit is pretty useless because the slope is determined by the noise in the observed OH reactivity with values below.

*Figure S8: is OH+NO2 considered as a loss?*

Yes it is.

*Figure S9: could the temperature profile be added?*

Done.



# Atmospheric Oxidation in the Presence of Clouds during the Deep Convective Clouds and Chemistry (DC3) Study

William H. Brune<sup>1</sup>, Xinrong Ren<sup>2,3</sup>, Li Zhang<sup>1</sup>, Jinqiu Mao<sup>4</sup>, David O. Miller<sup>1</sup>, Bruce E. Anderson<sup>5</sup>,  
5 Donald R. Blake<sup>6</sup>, Ronald C. Cohen<sup>7</sup>, Glenn S. Diskin<sup>5</sup>, Samuel R. Hall<sup>8</sup>, Thomas F. Hanisco<sup>9</sup>, L. Gregory Huey<sup>10</sup>, Benjamin A. Nault<sup>11,\*</sup>, Jeff Peischl<sup>12,13</sup>, Ilana Pollack<sup>12,13,#</sup>, Thomas B. Ryerson<sup>13</sup>, Taylor Shingler<sup>14,15</sup>, Armin Sorooshian<sup>16,17</sup>, Kirk Ullmann<sup>8</sup>, Armin Wisthaler<sup>18</sup>, and Paul J. Wooldridge<sup>7</sup>

<sup>1</sup>Department of Meteorology and Atmospheric Science, Pennsylvania State University, University Park, PA

10 <sup>2</sup>Department of Atmospheric and Oceanic Science, University of Maryland, College Park, MD

<sup>3</sup>Air Resources Laboratory, National Oceanic and Atmospheric Administration, College Park, MD

<sup>4</sup>Department of Chemistry and Biochemistry, University of Alaska, Fairbanks, Fairbanks, AK

<sup>5</sup>Chemistry and Dynamics Branch, NASA Langley Research Center, Hampton, VA

<sup>6</sup>Department of Chemistry, University of California, Irvine, CA

15 <sup>7</sup>Departments of Chemistry and Earth and Planetary Sciences, University of California, Berkeley, Berkeley, CA

<sup>8</sup>Atmospheric Chemistry Observations and Modeling Laboratory, National Center for Atmospheric Research, Boulder, CO

<sup>9</sup>Atmospheric Chemistry and Dynamics Branch, Goddard Space Flight Center, Greenbelt, MD

<sup>10</sup>School of Earth and Atmospheric Sciences, Georgia Institute of Technology, Atlanta, GA

<sup>11</sup>Department of Earth and Planetary Sciences, University of California, Berkeley, Berkeley, CA

20 <sup>12</sup>Cooperative Institute for Research in Environmental Sciences, University of Colorado, Boulder, CO

<sup>13</sup>Earth System Research Laboratory, National Oceanic and Atmospheric Administration, Boulder, CO

<sup>14</sup>Science Systems and Applications, Inc., Hampton, VA

<sup>15</sup>Atmospheric Composition Branch, NASA Langley Research Center, Hampton, VA

<sup>16</sup>Department of Chemical and Environmental Engineering, University of Arizona, Tucson, AZ

25 <sup>17</sup>Department of Hydrology and Atmospheric Sciences, University of Arizona, Tucson, AZ

<sup>18</sup>Department of Chemistry, University of Oslo, Oslo, Norway

\* now at Cooperative Institute for Research in Environmental Sciences, University of Colorado, Boulder, CO

# now at Department of Atmospheric Science, Colorado State University, Ft. Collins, CO

*Correspondence to:* William H. Brune (whb2@psu.edu)

30 **Abstract.** Deep convective clouds are critically important to the distribution of atmospheric constituents throughout the troposphere but are difficult environments to study. The Deep Convective Clouds and Chemistry (DC3) study provided the environment, platforms, and instrumentation to test oxidation chemistry around deep convective clouds and their impacts downwind. Measurements on the NASA DC-8 aircraft included those of ~~the radicals~~ hydroxyl (OH) ~~and~~ hydroperoxyl (HO<sub>2</sub>), OH reactivity, and more than 100 other chemical species and atmospheric properties. OH, HO<sub>2</sub>, and OH reactivity were  
35 compared to photochemical models, some with and some without simplified heterogeneous chemistry, to test the understanding of atmospheric oxidation as encoded in the model. In general, the agreement between the observed and modeled OH, HO<sub>2</sub>, and OH reactivity were ~~all well~~ within the combined uncertainties for ~~both~~ the model ~~with~~ ~~out~~ heterogeneous chemistry and the model ~~including that includes~~ heterogeneous chemistry with small OH and HO<sub>2</sub> uptake consistent with laboratory studies. This agreement is generally independent of the altitude, ozone photolysis rate, nitric oxide and ozone abundances,

modeled OH reactivity, and aerosol and ice surface area. For a sunrise to midday flight downwind of a nighttime mesoscale convective system, the observed ozone increase is consistent with the calculated ozone production rate. Even with some observed-to-modeled discrepancies, these results provide evidence that a current measurement-constrained photochemical models, properly constrained with measurements, can generally simulate observed atmospheric oxidation processes to within  
5 combined uncertainties, even around convective clouds. For this DC3 study, reduction in the combined uncertainties would be needed to confidently unmask errors or omissions in the model chemical mechanism.

## 1 Introduction

Deep convective clouds alter the chemical composition of the middle and upper troposphere (Chatfield and Crutzen, 1984).  
10 At its base, a cloud ingests air containing volatile organic compounds (VOCs) and anthropogenic pollutants emitted into the atmospheric boundary layer, lifts it to the upper troposphere where it spreads into the anvil and is eventually mixed with the surrounding air, including some from the lower stratosphere. Inside the convective cloud, the chemical composition is transformed: boundary layer air is diluted with cleaner mid-latitude air; water soluble chemical species are scrubbed by contact with cloud particles; and nitrogen oxides are added by lightning. At the same time, shading in the cloud core extends the  
15 lifetime of certain photochemically active compounds. This transformed chemical composition profoundly alters the atmospheric oxidation in the upper troposphere.

Atmospheric oxidation is driven primarily by hydroxyl (OH), whose concentration is strongly dependent on ozone ( $O_3$ ), especially in the upper troposphere (Logan et al., 1981). Ozone is a source of OH through its destruction by solar ultraviolet  
20 radiation, which produces an excited state oxygen atom that can react with water vapor to produce OH. Hydroxyl reactions with methane ( $CH_4$ ) and VOCs produce oxygenated volatile organic compounds (OVOCs), and in the presence of nitrogen oxide (NO), including organic peroxy ( $RO_2$ , where  $R = CH_3, C_2H_5, \dots$ ) and hydroperoxy ( $HO_2$ ). At the same time, OH reacts with carbon monoxide to produce  $HO_2$ . The reaction of these peroxy species with NO creates new nitrogen dioxide ( $NO_2$ ), which then absorbs solar radiation to produce NO and  $O(^3P)$ , and resulting in new ozone  $O(^3P)$  combines with  $O_2$  to form new  $O_3$ . In  
25 the absence of nitrogen oxides ( $NO_x = NO + NO_2$ ), the formation of OH and  $HO_2$  acts to destroy ozone through OH production and the reactions  $O_3 + HO_2$  and  $O_3 + OH$ . Thus, atmospheric oxidation is strongly dependent on the chemical composition of the air exiting deep convective clouds.

Deep convective clouds transform the chemical composition of the upper troposphere in several ways (Barth et al., 2015, and  
30 references therein).  $NO_x$  produced by lightning can have mixing ratios of several parts per billion (ppbv) in the anvil downwind of convection (Ridley et al., 1996; Schumann & Huntrieser, 2007; Pollack et al., 2016; Nault et al., 2017). In addition to long-lived chemical species such as  $CH_4$ , carbon monoxide (CO), and alkanes, short-lived chemical species such as isoprene and its

reaction products or those found in fire plumes can be rapidly transported from the planetary boundary layer (PBL) by convection into the upper troposphere (Apel et al., 2012; Apel et al., 2015). Convection also provides cloud particle liquid and solid surfaces, which can interact with gas-phase chemical species such as peroxides, potentially scrubbing some chemical species from the gas-phase, thereby altering the gas-phase chemistry and its products (Jacob, 2000; Barth et al., 2016). The mixture of organics and nitrogen oxides forms organic nitrates, which act as sinks for both organic and hydrogen radicals and nitrogen oxides (Nault et al., 2016). This mixture of organic and hydrogen peroxy and nitrogen oxides ~~enables enhanced~~ is calculated to enhance upper tropospheric O<sub>3</sub> production ~~that can be~~ in the range of a 2-15 ppbv day<sup>-1</sup> (Pickering et al., 1990; Ren et al., 2008; Apel et al., 2012; Olson et al., 2012). ~~Much of U~~upper tropospheric OH and HO<sub>2</sub> ~~is are~~ produced by the photolysis of oxygenated chemical species such as formaldehyde (CH<sub>2</sub>O) and peroxides, which are products of organic chemical species that were lofted into the upper troposphere (Jaeglé et al., 1997; Wennberg et al., 1998; Ren et al., 2008).

Aircraft observations of tropospheric OH and HO<sub>2</sub> have been compared to photochemical box models constrained by other simultaneous measurements (Stone et al., 2012). In the planetary boundary layer, measurements of HO<sub>2</sub> (Fuchs et al., 2011) and, in some instruments, measurements of OH (Mao et al., 2012) are affected by interferences due predominantly to high abundances of alkenes and aromatics. In the free troposphere where the abundances of these chemical species are much lower, measured and modeled OH and/or HO<sub>2</sub> often agreed to within their combined uncertainties, which are similar to those for ground-based studies (Chen et al., 2012; Christian et al., 2017), but in most of these studies, either modeled and measured OH or HO<sub>2</sub> inexplicably disagreed beyond combined model and measurement uncertainty for certain altitudes or chemical compositions (Mauldin et al., 1998; Faloon et al., 2000; Tan et al., 2001; Olson et al., 2004; Olson et al., 2006; Ren et al., 2008; Stone et al., 2010; Kubistin et al., 2010; Olson et al., 2012; Regelin et al., 2013).

Only a few studies included OH and HO<sub>2</sub> measurements to test the impact of deep convective clouds on atmospheric oxidation in the upper troposphere. During the First Aerosol Characterization Experiment (ACE-1), modeled OH was 40% greater than measured OH in clouds, possibly due to uptake of OH or HO<sub>2</sub> on the cloud particles (Mauldin et al., 1998). ~~In another study over the western Pacific, the observed to modeled HO<sub>2</sub> during cloud penetrations was on average only 0.65, compared to 0.83 outside of clouds, and this difference depended upon both the duration of the cloud penetration and the liquid water content (Olson et al., 2006).~~ In a different study, downwind of persistent deep convective clouds over the United States, the ratio of measured-to-modeled HO<sub>2</sub> increased from approximately 1 below 8 km altitude to 3 at 11 km altitude, suggesting an unknown source of HO<sub>x</sub> (= OH+HO<sub>2</sub>) coming from the nearby convection (Ren et al., 2008).

Heterogeneous chemistry on aerosol can impact OH and HO<sub>2</sub> abundances (Burkholder et al., 2015 and references therein). Typical OH and HO<sub>2</sub> accommodation coefficients used in global models are 0.2 on aerosol particles and 0.4-1.0 on ice. Results from a study over the north Atlantic Ocean indicated that the lower observed-than-modeled HO<sub>2</sub> could be resolved by including heterogeneous HO<sub>2</sub> loss (Jaeglé et al., 2000), but this did not resolve the same difference in clear air. This result differs from

an analysis of in-cloud measurements over the western Pacific, which provide evidence that uptake in ice clouds has little impact on HO<sub>2</sub> (Olson et al., 2004). ~~However in the same study, the observed-to-modeled HO<sub>2</sub> during liquid cloud penetrations was on average only 0.65, compared to 0.83 outside of clouds, and this difference depended upon both the duration of the cloud penetration and the liquid water content (Olson et al., 2006). The uptake of HO<sub>2</sub> in liquid cloud particles was also observed by Whalley et al. (2015). The uptake in liquid clouds using a simple heterogeneous chemistry scheme reduces modeled HO<sub>2</sub> too much in liquid clouds, while outside of the clouds, the reduction of HO<sub>2</sub> is only a few percent at altitudes above the planetary boundary layer (PBL) outside of clouds (Olson et al., 2004).~~

Laboratory studies show that ~~the HO<sub>2</sub> effective uptake coefficient on moist aerosol particles that contain copper includes metal catalyzed chemical reactions in the aqueous phase, which reduces the effective uptake coefficient to~~ is probably much less than ~~0.20~~ 0.1 in the lower troposphere but may be greater than 0.1 in the upper troposphere (Thornton et al., 2008). ~~However, other laboratory studies on other surfaces find similar lows~~ show that adding organics to the particles or lowering the relative humidity can reduce uptake coefficients (Lakey et al., 2015; Lakey et al., 2016). ~~These values are generally lower than the HO<sub>2</sub> effective uptake coefficient assumed in global chemical transport models.~~ On ice surfaces, the OH uptake coefficient is ~~thought to be~~ at least 0.1 and probably larger (Burkholder et al., 2016). In global models, metal catalyzed HO<sub>2</sub> destruction on aerosol particles can reduce global HO<sub>2</sub> in a way that is more consistent with observed OH and HO<sub>2</sub> (Mao et al., 2010). More recently, a global sensitivity analysis shows that modeled HO<sub>2</sub> is most sensitive to aerosol uptake at high latitudes (Christian et al. 2016), consistent with the conclusion of Mao et al. (2010).

In this paper, we focus on the comparison of measured and modeled OH and HO<sub>2</sub> near deep convective clouds and the implications of this comparison. Our goal is to test the understanding of atmospheric oxidation around deep convective clouds and in the cloud anvils. One possible effect is heterogeneous uptake of OH, HO<sub>2</sub>, and RO<sub>2</sub> around and in these clouds, which could alter OH and HO<sub>2</sub>. The data for this analysis were collected during the Deep Convective Clouds and Chemistry (DC3) study in 2012.

## 2 Measurement and modelling methods

### 2.1 The DC3 Study

Barth et al. (2015) provide a detailed description of the objectives, strategy, locations, instrument payloads, and modeling for DC3. DC3 was designed to quantify the link between the properties of deep convective clouds and changes in chemical composition in the troposphere. This section provides information on the aspects of DC3 that relate most directly to the measured and modeled OH, HO<sub>2</sub>, and OH reactivity.

DC3 involved several heavily instrumented aircraft, ground-based dual Doppler radar, lightning mapping arrays, and satellites (Barth et al., 2015). Studies were generally focused on areas in Colorado, Texas/Oklahoma, and Alabama that had dual Doppler radar coverage to quantify cloud properties. The field study took place in May through June, 2012. The aircraft were based in Salina, Kansas, which was central to the three main target regions in Colorado, Texas/Oklahoma, and Alabama. The NASA DC-8 sampled deep convection six times in Colorado, four times in Texas/Oklahoma, and three times in Alabama. Typically working with the NSF G-V aircraft, the DC-8 would sample the inflow region to a growing cumulus cloud and then after it formed, spiral up to the anvil height (~8-12 km) and join the NSF G-V in sampling the outflow region of the same convection.

In addition, during the night before 21 June, the outflow from a mesoscale convective system in the Midwest spread over Iowa and Missouri and then into Illinois and Tennessee. The DC-8 sampled the outflow of this MCS starting at sunrise of 21 June, flying six legs, each approximately 400 km long, across the outflow roughly perpendicular to the wind and adjusting the downwind distance to account for the outflow velocity (Nault et al., 2016). The southern 2/3 of the first three legs was in a thin cirrus cloud and the rest was clear.

Most DC3 flights began late morning in order to be in position to sample near active deep convection occurring in late afternoon and concluded near dusk for safety. About 90% of the flight time occurred when the solar zenith angle was less than 85°. Only the photochemical evolution flight on 21 June began before dawn.

The NASA DC-8 aircraft was the only aircraft that had an instrument to measure OH and HO<sub>2</sub>. The DC-8 payload was quite comprehensive, thus providing detailed chemical composition, particle characteristics, and meteorological parameters to constrain the photochemical box model that is used to compare observed and modeled OH and HO<sub>2</sub>. Direct comparison between observed and modeled OH and HO<sub>2</sub> is valid because the lifetimes of OH and HO<sub>2</sub> are short, a few seconds or less for OH and a few 10's of seconds for HO<sub>2</sub>. Thus, the analyses in this paper uses only measurements from the DC-8.

## 2.2 Measurement of Hydroxyl (OH) and Hydroperoxyl (HO<sub>2</sub>)

OH and HO<sub>2</sub> were measured with the Penn State Airborne Tropospheric Hydrogen Oxides Sensor (ATHOS), which uses laser induced fluorescence (LIF) in low pressure detection cells (Hard et al., 1984). ATHOS is described by Faloon et al. (2004). Sampled air is pulled through a 1.5 mm pinhole into a tube that leads to two detection axes. The pressure varies from 12 hPa at low altitudes to 3 hPa aloft. The laser beam is passed 32 times through the detection region with a multipass cell set at right angles to the gated microchannel plate detector. As the air passes through a laser beam, OH absorbs the laser radiation (3 kHz repetition rate, 20 ns pulse length) and fluoresces. In the first 100 ns, the signal contains fluorescence as well as scattering from the walls, Rayleigh scattering, and clouds drops. OH fluorescence is detected from 150 ns to 700 ns after each laser pulse. OH is detected in the first axis; reagent nitric oxide (NO) is added before the second axis to convert HO<sub>2</sub> to OH, which is then detected by LIF. The laser wavelength is tuned on-resonance with an OH transition for 15 seconds and off-resonance for 5

seconds, resulting in a measurement time resolution of 20 seconds. The OH fluorescence signal is the difference between on-resonance and off-resonance signals. The ATHOS nacelle inlet is attached below a nadir plate of the forward cargo bay of the DC-8 and the lasers, electronics, and vacuum pumps were inside the forward cargo bay.

- 5 In clouds, ~~it is possible for~~ cloud particles ~~to~~ can be pulled into the detection system and remain intact enough to cause large, short scattering signals in the fluorescence channels randomly during on-resonance and off-resonance periods. Differencing these signals to find OH creates large positive and negative noise, which reduces the measurement precision by as much as a factor of five. When the background signal due to these cloud particles exceeded the average background signal by four standard deviations, the on-line and off-line data were removed from the data set before the analyses were performed. Less than 3% of the data were removed. The overall results for OH and HO<sub>2</sub> vary less than 4% for filtering between two and six standard deviations.

The instrument was calibrated on the ground both in the laboratory and during the field campaign. Different sizes of pinholes were used in the calibration to produce different detection cell pressures to mimic different altitudes. Monitoring laser power, Rayleigh scattering, and laser linewidth maintained this calibration in flight. For the calibration, OH and HO<sub>2</sub> were produced through water vapor photolysis by UV light at 184.9 nm. Absolute OH and HO<sub>2</sub> mixing ratios were calculated by knowing the 184.9 nm photon flux, which was determined with a Cs-I phototube referenced to a NIST-calibrated photomultiplier tube, the H<sub>2</sub>O absorption cross section, the H<sub>2</sub>O mixing ratio, and the exposure time of the H<sub>2</sub>O to the 184.9 nm light. The absolute uncertainty was estimated to be ±16% for both OH and HO<sub>2</sub> at a 1σ confidence level. The 1σ precision for a one-minute integration time during this campaign was about 0.01 parts per trillion by volume (pptv, equivalent to pmol mol<sup>-1</sup>) for OH and 0.1 pptv for HO<sub>2</sub>. Further details about the calibration process may be found in Faloon et al. (2004).

For environments with substantial amounts of alkenes and aromatics, ATHOS has interferences for both OH (Mao et al., 2012) and HO<sub>2</sub> (Fuchs et al., 2011). New ATHOS measurement strategies have minimized these interferences, but these strategies were not fully developed in time for DC3. However, recent missions have shown that the OH ~~and HO<sub>2</sub> interferences are~~ interference is significant only just above forests or cities and ~~are~~ is negligible above the ~~planetary boundary layer~~ PBL. For OH, we will factor in the likelihood that the OH has an interference in the ~~planetary boundary layer~~ PBL above forests in the discussion comparing observed and modeled OH. ~~For HO<sub>2</sub>, we can estimate the interference using modeled RO<sub>2</sub>. In relation to HO<sub>2</sub>, the relative average detection sensitivity of RO<sub>2</sub> is 0.6±0.2 of HO<sub>2</sub> for this ATHOS configuration (Ren et al, 2012).~~ Applying this value to RO<sub>2</sub> from alkenes and aromatics, but not CH<sub>3</sub>O<sub>2</sub> for which we saw no interference in the laboratory, reduces observed HO<sub>2</sub> by 10%, on average, with an estimated uncertainty of a factor of two.

For HO<sub>2</sub>, the correction method uses more than 1000 RO<sub>2</sub> chemical species modeled by MCMv3.3.1 and assumes that they are ingested into the detection flow tube without any wall loss. The model then calculates the resulting OH, which is what

would be detected as HO<sub>2</sub>. The calculated concentration of reactant NO is  $\sim 3 \times 10^{13} \text{ cm}^{-3}$  and the reaction time was determined to be 3.7 ms, as verified by the HO<sub>2</sub> conversion rate measured in the laboratory. This calculation was repeated for each one-minute time step and this calculated interference was then subtracted from the observed HO<sub>2</sub>, resulting in the HO<sub>2</sub> values reported here. Observed HO<sub>2</sub> was reduced by an average of 2%, with some peaks of 10%, both in the PBL and aloft. Because the model RO<sub>2</sub> mechanisms are uncertain, the uncertainty for this correction is estimated to be a factor of 2. This correction has been applied to the HO<sub>2</sub> measurements, which increases the absolute uncertainty for HO<sub>2</sub> from  $\pm 16\%$  to  $\pm 20\%$ , 1 $\sigma$  confidence.

### 2.3 Measurement of OH Reactivity

The OH reactivity is the sum of the product of OH reactants and their reaction rate coefficients with OH and ~~It~~ is the inverse of the OH lifetime. It is directly measured by adding OH to the air flowing through a tube and then monitoring the decay of the logarithm of the OH signal as the reaction time between the OH addition and OH detection is increased (Kovacs and Brune, 2001). OH can also be lost to the tube walls, so the measured OH reactivity must be corrected for this wall loss. The OH reactivity can be determined from the equation

$$k_{OH} = -\frac{\ln([OH]/[OH]_0)}{\Delta t} - k_{wall} \quad (1)$$

where  $[OH]_0$  is the initial OH concentration,  $[OH]$  is the [OH] concentration after a reaction time  $\Delta t$  between OH and its reactants, and  $k_{wall}$  is the OH wall loss.

The OH reactivity is measured with the OH Reactivity instrument (OHR), which sits in a rack in the DC-8 forward cargo (Mao et al., 2009). Ambient air is forced into a flow tube (10 cm dia.) at a velocity of 0.3-0.7 m s<sup>-1</sup>, flows past the pinhole of an OH detection system similar to the one used for ATHOS, and then is expelled out of the aircraft. In a movable wand in the center of the flow tube, OH is produced by the photolysis of water vapor by 185 nm radiation and then injected into the flow tube, mixing with the ambient air flow. As the wand is pulled back, the distance between the injected OH and the OH reactants in the air increases, resulting in the OH decay. The distance divided by the measured velocity gives the reaction time. The wand moves 10 cm in 12 s and then returns to the starting position, measuring a decay every 20 s.

The OHR calibration was checked in the laboratory before and after DC3 using several different known amounts of different chemical species. During a semi-formal OHR Intercomparison in Juelich Germany in October 2015, the OHR instrument was combined with a different laser, wand drive, and electronics, and despite the difficulties encountered, it was found to produce accurate OH reactivity measurements (Fuchs et al., 2017).



The uncertainty in the OH reactivity measurement consists of an absolute uncertainty and the uncertainty associated with the wall loss subtraction. Changes in the OHR instrument between ARCTAS and DC3 result in slightly different instrument operation, wall loss, and measurement uncertainties between this paper and Mao et al. (2009). The pressure dependence of the OH wall loss was measured in the laboratory using ultra zero air (99.999% pure) and was found to be between  $2\text{ s}^{-1}$  and  $4\text{ s}^{-1}$  over the range pressures equivalent to 0 to 12 km altitude. The flow tube wall is untreated aluminium so that every OH collision with the wall results in complete OH loss no matter the environment or altitude. Mao et al. (2009) confirm the zero found in the laboratory agrees with the zero found in flight. From these laboratory calibrations, the estimated uncertainty in the wall loss correction is  $\pm 0.5\text{ s}^{-1}$  ( $1\sigma$  confidence). When the OH reactivity is  $1\text{ s}^{-1}$ , the combined uncertainty from the absolute uncertainty and the zero decay is  $\pm 0.6\text{ s}^{-1}$ ,  $1\sigma$  confidence, which suggests that 90% of the measurements should be within  $\pm 1.2\text{ s}^{-1}$  of the mean value.

Air entering the OHR flow tube was warmed ~~from~~ by  $\sim 5^\circ\text{C}$  at altitudes below 2 km to by as much ~~as~~  $75^\circ\text{C}$  at 12 km. The flow tube pressure was 50 hPa greater than ambient due to the ram force pushing air through the flow tube. These temperature and pressure differences can affect the reaction rate coefficients for some OH reactants and thus change the OH reactivity. In order to compare observed and model-calculated OH reactivity, the model was run for both ambient conditions and for the OHR flow tube pressure and temperature, but the observed and model-calculated OH reactivity will be compared for the OHR flow tube pressure and temperature.

#### 2.4 Measurement of other chemical species, photolysis frequencies, and other environmental variables

Accurate measurements of other chemical species and environmental variables are critical for this comparison of measured and modeled OH,  $\text{HO}_2$ , and OH reactivity. The photolysis frequency measurements are particularly critical for DC3 because of all the time spent flying around clouds and in the deep convection anvil. A list of these measurements is given in Table S1 and is summarized in Barth et al. (2015; 2016) and ~~uncertainties for most~~ some of these instruments is provided by Barth et al. (2016) and Pollack et al. (2016). The list of measured chemical species includes  $\text{CO}$ ,  $\text{CH}_4$ ,  $\text{N}_2\text{O}$ ,  $\text{NO}$ ,  $\text{NO}_2$ ,  $\text{O}_3$ , organic nitrates, alkanes, alkenes, aromatics, aldehydes, alcohols, and peroxides.

#### 2.5 Photochemical Box Model

The photochemical box model used in this study is based on the Matlab-based modeling framework, the Framework for Zero-Dimensional Atmospheric Modeling (F0AM), which was developed and made freely available by Glenn Wolfe (Wolfe et al., 2016). The gas-phase photochemical mechanism was Master Chemical Mechanism v3.3.1 (MCMv331) (Saunders et al., 2003; Jenkin et al., 2003). This model was constrained by all simultaneous measurements of chemical species, photolysis frequencies, and meteorological variables (Table S1) and then run to calculate OH,  $\text{HO}_2$ , and all reaction products that were not measured, such as organic peroxy radicals. Pernitric acid ( $\text{HO}_2\text{NO}_2$ ) was measured but was not used to constrain the model because few



measurements were reported below 4 km. Measured and modeled HO<sub>2</sub>NO<sub>2</sub> agree to within ~25% from 5 to 9 km, and modeled HO<sub>2</sub>NO<sub>2</sub> is 1.7 times that measured above 8 km. This difference between using modeled and observed HO<sub>2</sub>NO<sub>2</sub> made only a few percent difference in modeled OH and HO<sub>2</sub>.

5 A publically available merge file provided the constraining measurements for the photochemical model (DC3 Data, 2017). We chose the one-minute merge as a compromise between higher frequency measurements that needed to be averaged into one-minute bins and lower frequency measurements that needed to be interpolated between one-minute bins. OH and HO<sub>2</sub> measurements, made every 20 seconds, were averaged into the one-minute bins.

10 Heterogeneous chemistry was added to the model for some model runs. While many chemical species undergo heterogeneous chemistry, most of the chemical species that strongly influence OH and HO<sub>2</sub> were measured so that their heterogeneous chemistry can be ignored in these comparisons between observed and modeled OH and HO<sub>2</sub>. However, organic peroxy radicals were not measured and their heterogeneous chemistry could have an ~~un~~<sup>un</sup>-large influence on OH and HO<sub>2</sub>. Thus, heterogeneous chemistry is implemented in the model for OH, HO<sub>2</sub>, and RO<sub>2</sub>, even though the uptake of RO<sub>2</sub> is thought to be  
 15 small.

The common types of particles encountered with convection are humidified sub-micron aerosol particles all around and in the convection, liquid drops in lower altitude clouds, and ice particles in the deep convective cloud anvil. The effective uptake of OH, HO<sub>2</sub>, and RO<sub>2</sub> onto these surfaces was found from

20

$$\frac{1}{\gamma_{eff}} = \left( \gamma_{surface} + \left( \frac{1}{\alpha} + \frac{1}{\gamma_{sol} + \gamma_{rxn}} \right)^{-1} \right)^{-1} + \frac{0.75 + 0.286 Kn}{Kn (Kn + 1)} \quad (2)$$

where  $\gamma_{eff}$  is the effective uptake coefficient,  $\gamma_{surface}$  is surface reaction uptake,  $\alpha$  is the accommodation coefficient,  $\gamma_{sol}$  is uptake due to diffusion through the liquid,  $\gamma_{rxn}$  is uptake due to aqueous-phase reactions, and the last term is the inverse of the gas-phase diffusion in terms of the Knudsen number,  $Kn$  (Burkholder et al., 2016; Tang et al., 2014). The first term on the right-hand side is the total uptake coefficient,  $\gamma_{total}$ . The gas-phase molecular diffusion of chemical species to the particle surface can limit the uptake, especially for large accommodation coefficients and large particles.

The total uptake coefficient for OH and HO<sub>2</sub> depends on the particle chemical composition, phase, and size (Burkholder et al.,  
 30 2015). While some particle properties were measured in DC3, there are unknowns in particle composition and uncertainties in trying to calculate the uptake coefficient for each one-minute time step. The goal of including heterogeneous chemistry in the model is to determine if heterogeneous chemistry has a substantial impact on the comparison between the observed and

modeled OH and HO<sub>2</sub>. Thus, we will run the model with fixed values for the total uptake; if the impact on the modeled OH and HO<sub>2</sub> is substantial, then we will have to improve the parameterization of the total uptake.

For aerosol particles, the dry aerosol particle radius is multiplied by the growth factor and then the area-weighted median ambient aerosol radius is determined. The surface area is found by summing the surface area in each bin, multiplied by the bin width, and then corrected by the square of the growth factor for each minute. Ice particles are assumed to be spherical and their size distribution is used to determine the median particle radius. The ~~surface area concentrations~~ surface area per cm<sup>-3</sup> of air is determined by summing the ~~surface area concentrations~~ surface area per cm<sup>-3</sup> of air times the bin width, which were provided in the merge file for each minute.

The model is then run for three primary different cases: gas-phase with no heterogeneous chemistry (called “no-het”), heterogeneous chemistry (called “het”) with  $\alpha_{\text{aer}} = 0.2$  (which is consistent with the value used in some global models) and  $\alpha_{\text{ice}} = 1.0$  for OH, HO<sub>2</sub>, and RO<sub>2</sub>, and maximum heterogeneous chemistry (called “hetmax”) with  $\alpha_{\text{aer}} = 1.0$  and  $\alpha_{\text{ice}} = 1.0$ . The observed and modeled OH and HO<sub>2</sub> are compared for these three cases.

OH reactivity was also modeled for comparison to observed OH reactivity. Modeled OH reactivity was calculated from ~~only~~ the measured chemical species ~~plus or from the measured chemical species plus~~ OH reactants that were not measured but weare produced by the photochemical model. Examples of these additional OH reactants are organic peroxy, organic peroxides, and unmeasured aldehydes. Uncertainty in the modeled OH reactivity is estimated to be  $\pm 10\%$ ,  $1\sigma$  confidence (Kovacs et al., 2001)

Uncertainty in the photochemical box model can be assessed with Monte Carlo methods in which model constraints are varied randomly over their uncertainty ranges and then the widths of the resulting distributions for OH and HO<sub>2</sub> abundances are used to determine the model uncertainties. If just reaction rate coefficients, photolysis frequencies, and reaction products are varied, the typical OH and HO<sub>2</sub> uncertainties at the  $1\sigma$  confidence level are typically  $\pm(10-15)\%$  (Thompson and Stewart, 1991; Kubist~~on~~ et al., 2010; Olson et al., 2012; Regelin et al., 2013). When uncertainties in the measurements used to constrain the model are included, uncertainties at the  $1\sigma$  confidence level are typically  $\pm 20\%$  or more for both local and global models (Chen et al., 2012; Christian et al., 2016). We use  $\pm 20\%$  uncertainty at the  $1\sigma$  confidence level for the model uncertainty in this paper, which can be combined with the measurement uncertainty of about  $\pm 20\%$  uncertainty at the  $1\sigma$  confidence level. We note that the observed-to-modeled difference for statistical significance lies approximately at the sum of the standard deviations of the mean for the observations and model. As a result, the factors of 1.4 and 1/1.4 serve as indicators for agreement between observed and modeled OH, HO<sub>2</sub>, and OH reactivity.

We decided to make the comparisons between observations for all the DC3 results, including transits from Salina KS to the deep convection region. Using all the data gives a more robust comparison and was found to give comparison results identical to that using data sets restricted to the radar-enhanced sites in Colorado, Texas/Oklahoma, and Alabama near vicinity of convection. The direct impact of deep convection is also tested by examining the observed-to-modeled comparison as a function of the ice ~~surface area concentrations~~ surface area per cm<sup>-3</sup> of air. This analysis achieves the goals laid out in the introduction.

The model was run 27 times to test the sensitivity of the calculated OH and HO<sub>2</sub> to different factors. First, the chemical mechanism was expanded to include the reactions of CH<sub>3</sub>O<sub>2</sub>+OH and C<sub>2</sub>H<sub>5</sub>O<sub>2</sub>+OH (Assaf et al., 2017), and in some cases, reactions of OH with the next 300 most significant RO<sub>2</sub> species that comprise 95% of the modeled RO<sub>2</sub> total, assuming a reaction rate coefficient of 10<sup>-10</sup> cm<sup>3</sup>s<sup>-1</sup>. Adding the measured reactions decreased OH by ~1% (5% maximum) and increased HO<sub>2</sub> by <1% (15% maximum); adding the assumed reactions of OH with other RO<sub>2</sub> species changed modeled OH and HO<sub>2</sub> by less than 3%. Second, the decay time of the unconstrained modeled oxygenated intermediates was varied from 6 hours to 5 days. The resulting modeled OH and HO<sub>2</sub> varied by ~10% over this range. This decay time serves as a proxy for surface deposition in the planetary boundary layer as well as for recently measured rapid reactions of highly oxidized RO<sub>2</sub> + RO<sub>2</sub> to form peroxides (Bernt et al., 2018). This decay time is highly uncertain. The mean of the model runs using decay time of 6 hours, 1 day, and 5 days and using the model mechanism including CH<sub>3</sub>O<sub>2</sub>+OH and C<sub>2</sub>H<sub>5</sub>O<sub>2</sub>+OH was used for the comparisons to the measurements.

### 3 Results

The DC3 chemical environments dictate the OH and HO<sub>2</sub> abundances. Using all the flight data, altitude profiles of NO, CO, O<sub>3</sub>, and particle surface area were collected into 0.5 km altitude bins and the median values were found (Fig. 1). The radar altitude is used for these comparisons because the surface elevations and thus planetary boundary layer (PBL) is at different pressure altitudes for the Colorado, Texas/Oklahoma, and Alabama regions.

Median NO exhibits a “C”-shaped profile with median values near 50 pptv in the planetary boundary layer, a minimum of 10 pptv at 5 km altitude, and a maximum value of 0.5 ppbv above 10 km. NO in the PBL was largely due to anthropogenic pollution; NO aloft was mainly due to a combination of lightning and stratospheric NO<sub>x</sub>. Median CO slightly decreased from ~120 ppbv near the surface to ~80 ppbv at 12 km. Median O<sub>3</sub> was 50 ppbv in the PBL and then increased to as much as 100 ppbv near 12 km, likely due to stratospheric ozone influence. The ~~surface area concentrations~~ surface area per cm<sup>-3</sup> of air of aerosol was 10<sup>-6</sup> cm<sup>2</sup>cm<sup>-3</sup> in the PBL, but was about 3x10<sup>-7</sup> cm<sup>2</sup>cm<sup>-3</sup> above that. Median ice surface area was as much as 2x10<sup>-5</sup> cm<sup>2</sup>cm<sup>-3</sup>, with high variability spanning a factor of 100.

### 3.1 Comparing HO<sub>x</sub> Observations with the no-het Model

Observations will be compared to the no-het model, which should be considered as the base case; the heterogeneous cases will be considered later. When observed and modelled OH and HO<sub>2</sub> are plotted against time, model results generally agree with the observed values to within combined uncertainties, with occasional periods in which the observed values can be either much larger or smaller than all the model variants. A plot of this time series of observed and modeled OH and HO<sub>2</sub> includes fourteen model runs with model integration times varied from 3 to 24 hours, dilution frequencies varied from 6 hours to 5 days, and without or without including the RO<sub>2</sub>+OH reaction (Fig. S1). Another way to examine these results is to plot the observed and modeled values as a function of altitude and other influential chemical species, photolysis frequency, or location.

Median observed OH was about  $2 \times 10^6 \text{ cm}^{-3}$  from ~3 km to 10 km altitude, but was greater than  $3 \times 10^6 \text{ cm}^{-3}$  below 3 km and just above 10 km, where a spike in OH brings the median OH to  $3.5 \times 10^6$  (Fig. 2). This profile is consistent with the NO profile; for the NO amounts measured in DC3, increased NO shifts more HO<sub>x</sub> to OH. The median observed-to-modeled ratio for the no-het case is close to 1.0 at 0-4 km, is 1.2-1.3 between 5 km and 9 km and 0.8-0.9 above 10 km. Generally, the observed-to-modeled ratio is within the estimated combined uncertainties described previously. The statistics from scatter plots using a fitting routine that considered uncertainty in both the observations and the model (York et al., 2004) indicate generally good agreement between observed and modeled OH, with the model explaining 854% of the OH variance (Table 1, Fig. S2+).

Median observed HO<sub>2</sub> was 10-22 pptv below 2 km altitude and decreased almost linearly to 3 pptv at 12 km (Fig. 3). This profile is consistent the altitude distribution of HO<sub>x</sub> sources, which are greater near the surface, and even with convective uplift of oxygenated chemical species such as HCHO, are still much less than at the surface. Again, the observed-to-modeled ratio is within the estimated combined uncertainties. In addition, the statistics from scatter plots indicate generally good agreement between observed and modeled HO<sub>2</sub>, with the model explaining 7568% of the HO<sub>2</sub> variance (Table 1, Fig. S2+). However, the median observed-to-modeled ratio for the no-het case is 1.3 at 1 km altitude, decreases to ~1 at 5 km and remains near 1 above 5 km. The ratio of the modeled RO<sub>2</sub> to HO<sub>2</sub> is typically 1 in the PBL and 0.5 above 5 km. Error in our assumptions for the RO<sub>2</sub> interference in the HO<sub>2</sub> measurement is a possible cause of the greater observed-to-modeled HO<sub>2</sub> below 3 km, but this difference is still well within the combined uncertainty limits.

An indicator of the HO<sub>x</sub> cycling between OH and HO<sub>2</sub> is the HO<sub>2</sub>/OH ratio. If the primary HO<sub>x</sub> production rate is smaller than the OH-HO<sub>2</sub> cycling rate and there is sufficient NO, the HO<sub>2</sub>/OH ratio approximately equals the ~~total~~-OH loss frequency that cycles OH into HO<sub>2</sub> divided by the reaction frequency of HO<sub>2</sub> reactions that cycle HO<sub>2</sub> to OH, primarily HO<sub>2</sub> reactions with NO and O<sub>3</sub>.

$$\frac{[\text{HO}_2]}{[\text{OH}]} = \frac{k'_{\text{OH}}}{k_{\text{HO}_2+\text{NO}}[\text{NO}] + k_{\text{HO}_2+\text{O}_3}[\text{O}_3]} \quad (3)$$

where  $k'_{\text{OH}}$  is the loss frequency of OH for reactions that lead to HO<sub>2</sub> production and the two terms in the denominator are loss frequencies for HO<sub>2</sub> with NO and O<sub>3</sub>.

5

This ratio is ~~~140 below 2 km altitude and falls~~ Both the observed and modeled HO<sub>2</sub>/OH ratios are greater than 100 below 4 km and fall to less than 10 at 12 km (Fig. S32). This profile comes from the greater amount of OH reactants at lower altitudes, which increases the ratio, as opposed to the greater NO amount aloft, which decreases the HO<sub>2</sub>/OH ratio. The observed-to-modeled ratio is well within the approximate uncertainty limits (1σ confidence) of a factor of 1/1.4 to 1.4.

10

Another good test of the model photochemistry is the comparison of measured and modeled OH and HO<sub>2</sub> as a function of controlling variables (Fig. 4). The photolysis frequency for O<sub>3</sub> producing an excited state O atom, JO(<sup>1</sup>D), and O<sub>3</sub> are both involved in the production of OH. O<sub>3</sub> and NO cycle HO<sub>2</sub> to OH, while modeled OH reactivity cycles OH back to HO<sub>2</sub>. In general, measured and model OH and HO<sub>2</sub> agree well over a factor of 600 from 2x10<sup>-6</sup> s<sup>-1</sup> to 7x10<sup>-5</sup> s<sup>-1</sup> for JO(<sup>1</sup>D), a factor of 5 from 2x10<sup>-3</sup> ppbv to 7x10<sup>-1</sup> ppbv for NO, a factor of 5 from 40 ppbv to 100 ppbv for O<sub>3</sub>, and a factor of 10 for modeled OH reactivity. The observed-to-modeled HO<sub>2</sub> ratio shows little evidence of a NO-dependence. The reanalysis of Olson et al. (2006) explains the NO-dependence of the ratio discussed in Faloon et al., (1999), and the NO-dependence observed often in ground-based studies is not evident until NO exceeds 3-5 ppbv. Because the highest NO mixing ratio encountered in DC3 was about 3 ppbv, we would not expect to see this effect in the DC3 results. One exception is OH for NO greater than 1 ppbv, but

15

20

there are few data points defining the median OH values in this case. It is possible that the behavior as a function of controlling variables is also a function of altitude. However, with the exception of low values of JO(<sup>1</sup>D), the median observed-to-modeled OH and observed-to-modeled HO<sub>2</sub> are generally independent of both the controlling variables and altitude (Fig. S43). The observed-to-modeled OH and HO<sub>2</sub> are also independent of whether the measurements were made in Colorado, Texas/Oklahoma, or Alabama (Fig. S54), although the ratios for some altitudes vary widely due to fewer data points in the altitude medians.

25

### 3.2 Comparing OH Reactivity Observations with the no-hot Model

The measured OH reactivity was as much as 30 s<sup>-1</sup> typically 2 s<sup>-1</sup> to 5 s<sup>-1</sup> in the PBL but fell off to less than 1 s<sup>-1</sup> at 12 km altitude (Fig. 5). Observed and modeled OH reactivity are in reasonable agreement when considered in the context of the typical limit-of-detection for OH reactivity (Fuchs et al., 2017). For DC3, limit-of-detection for 20-second measurements is estimated to be about 0.6 s<sup>-1</sup>, which means that most OH reactivity measurements were at or below the limit-of-detection. The modeled OH reactivity for the OHR flow tube temperature and pressure is greater than the modeled OH reactivity for ambient temperature and pressure by about 0.3 s<sup>-1</sup> below 2 km and by about 0.2 s<sup>-1</sup> above 10 km (Fig. 5). This difference is negligible

30

below 2 km, but grows to a factor of 1.7 at 10 km where the ambient OH reactivity is just 0.2-0.3 s<sup>-1</sup>, but for the entire altitude, the difference between the observed and modeled OH reactivity ~~looks quite similar for either modeled values~~ is 0.2 s<sup>-1</sup> larger for the modelled OH reactivity at OHR flow tube conditions than for the modelled OH reactivity at ambient conditions, a difference that is swamped by the noise in the observed OH reactivity. The median observed OH reactivity is 1-3 s<sup>-1</sup> greater than the modeled OH reactivity below 3 km, and this difference could be evidence of missing OH reactivity.

The percent error between the OH reactivity calculated with modeled chemical species and that calculated from only the measured OH reactants is, on average, less than 4%. In the PBL over Alabama, the OH reactivity calculated from the model after one day of integration was on average 10% larger than that calculated from the chemical species measurements. In the Colorado and Texas PBL, the average difference was less than 4%. Thus, for much of DC3, the OH reactivity calculated from the DC3 measurements almost completely comprises the measured OH reactivity.

According to the model calculations, CO contributes the most to the OH reactivity, with ~20% in the PBL and 30-40% aloft. Next is CH<sub>4</sub> at (5-10)%, HCHO at (5-10)%, O<sub>3</sub> at (2-10)%, CH<sub>3</sub>CHO at ~5%, and Isoprene at (1-2)%, except in some PBL plumes where it was as much as 60%. The most significant ten chemical species were all measured and account for (60-70)% of the total model-calculated OH reactivity.

### 3.3 Comparing OH Production and OH Loss

Another critical test of OH photochemistry is the balance between OH production and loss (Fig. 6). The OH lifetime is typically tenths of a second or less in the PBL and a few seconds at high altitude. Thus, for one-minute averages, OH production and loss should essentially be in balance to within the uncertainty estimates from a propagation of error analysis. Modeled OH production and loss are in balance. These uncertainty estimates were obtained by assuming that OH production is dominated by HO<sub>2</sub>+NO→OH+NO<sub>2</sub> and ozone photolysis followed by reaction of excited state oxygen atoms with water vapor and the OH loss is given by the OH reactivity multiplied by the OH concentration. The largest contributor to the uncertainty is the zero offset for the OH reactivity instrument. The observed OH loss is the observed OH multiplied by the observed OH reactivity, which was corrected for the difference between ambient and OHR flow tube conditions. While this analysis cannot preclude missing or additional OH production and loss of 10<sup>6</sup> cm<sup>-3</sup> s<sup>-1</sup> or less, the OH production and loss, ~~which that~~ are calculated mostly from observations, agree to within uncertainties.

### 3.4 Comparing HO<sub>x</sub> Observations with Models Containing Heterogeneous Chemistry

Ample aerosol and ice during DC3 provide tests for possible effects of heterogeneous chemistry on OH and HO<sub>2</sub>. We look first at the impact that adding heterogeneous chemistry (het,  $\alpha_{ice} = 1.0$ ;  $\alpha_{aer} = 0.2$ ), and maximum heterogeneous chemistry (hetmax,  $\alpha_{ice} = 1.0$ ;  $\alpha_{aer} = 1.0$ ) to the model has on the comparison of median observed and modeled OH and HO<sub>2</sub>.

In Figures 2-4 and S65-S76 and Tables 1 and S1, the no-het and het models agree with the observed OH and HO<sub>2</sub> to within the combined uncertainties, with the exception of the het model for HO<sub>2</sub> when the aerosol ~~surface area concentrations~~surface area per cm<sup>-3</sup> of air was greater than 10<sup>-6</sup> cm<sup>2</sup> cm<sup>-3</sup>. In that case, the ratio of the observed-to-modeled HO<sub>2</sub> was too large, indicating that the het model was reducing HO<sub>2</sub> too much. On the other hand, the difference between the observations and hetmax model ~~gives OH and HO<sub>2</sub> values that are substantially different~~is greater than the uncertainty limits from the observations in almost every comparison. When the OH observed-to-modeled ratio is plotted as a function of aerosol surface area (Fig. 7), the no-het model gives a better agreement with the observations as a function of surface area than the het model does. For HO<sub>2</sub>, the difference between the het model and the observations exceeds the combined uncertainty limits ~~is substantially above observations~~ when the aerosol ~~surface area concentrations~~surface area per cm<sup>-3</sup> of air exceeds 10<sup>-6</sup> cm<sup>2</sup>cm<sup>-3</sup>.

For heterogeneous uptake on ice, the observed-to-modeled comparisons of OH and HO<sub>2</sub> are roughly independent of ice surface area (Fig. S87). Comparing the model with HO<sub>2</sub> uptake on ice equalling 1 to a model with HO<sub>2</sub> uptake on ice set to zero decreases OH and HO<sub>2</sub> by only 10% for the largest ice ~~surface area concentrations~~surface area per cm<sup>-3</sup> of air of 7x10<sup>-5</sup> cm<sup>2</sup> cm<sup>-3</sup>. Thus, HO<sub>2</sub> uptake on ice causes at most a few percent decrease in HO<sub>2</sub>.

The addition of RO<sub>2</sub> heterogeneous chemistry on aerosol and ice did reduce the modeled RO<sub>2</sub> by 10% on average for the het model, but did not reduce either OH or HO<sub>2</sub> by more than 1%, on average. Thus, including RO<sub>2</sub> uptake along with OH and HO<sub>2</sub> uptake had only a small impact on the heterogeneous effects on OH and HO<sub>2</sub>.

### 20 3.5 Evolution of OH and HO<sub>2</sub> Downwind of a Nighttime Mesoscale Convective System (MCS)

The quasi-Lagrangian tracking of convective outflow on 21 June provided an opportunity to test the photochemical evolution of OH and HO<sub>2</sub> in the morning of 21 June ~~(Fig. S98)~~. The flight legs perpendicular to the wind were approximately advected downwind. Initially, observed and modeled OH and HO<sub>2</sub> were close to 0 (Fig. 8). However, both modeled OH and HO<sub>2</sub> soon grew to exceed measured OH and HO<sub>2</sub> by about 20%-50% until about 8 am local time. For the remainder of the flight, observed and modeled OH is in substantial agreement for all three models, which are essentially identical except between 9:30 and 11:00 when the aerosol ~~surface area concentrations~~surface area per cm<sup>-3</sup> of air was the greatest. For HO<sub>2</sub>, observed HO<sub>2</sub> exceeds modelled by a factor of ~1.5 after 9 (CST). In this time period, the observations agree best with the no-het and het models. Thus, the basic observed behavior of OH and HO<sub>2</sub> is captured by the no-het and het models although there is quantitative disagreement between the model and observations of OH and HO<sub>2</sub> for local solar time between 5:45 and 8:15 (CST) and of HO<sub>2</sub> after 9 (CST).

Even though more than half of the first three legs were in an ice cloud, the scaled surface area for aerosol particles ([Figure 8](#), top panel) and ice ([Figure 8](#), bottom panel) do not correlate with the differences between observed and modeled OH and HO<sub>2</sub>.

As a test of the photochemistry, OH can be calculated from the observed decay of OH reactants. Nault et al. (2016) showed that the observed decay of ethane, ethyne, and toluene were consistent with an average measured OH of  $9.5 \times 10^6 \text{ cm}^{-3}$  for times from 7:35 to 9:50 local time. An ATHOS recalibration since the publication of Nault et al. (2016) brings the mean number for this time interval down to  $8.8 \times 10^6 \text{ cm}^{-3}$ . This median revised observed OH concentration is consistent with the mean modeled OH concentration of  $9.6 \times 10^6 \text{ cm}^{-3}$ . These results agree well within uncertainties and support the observed OH.

Another good test of the photochemistry is a comparison between the observed  $\text{O}_3$  change and the accumulated calculated  $\text{O}_3$  production rate (Fig. 9). The actual  $\text{O}_3$  change is actually slightly larger than the observed  $\text{O}_3$  because some of the new  $\text{O}_3$  is partitioned into  $\text{NO}_2$ , so that the quantity of interest is the change in  $\text{O}_3$  plus the change in  $\text{NO}_2$ . The ozone production rate,  $P(\text{O}_3)$ , can be calculated with the equation

$$P(\text{O}_3) = k_{\text{NO}+\text{HO}_2}[\text{NO}][\text{HO}_2] + \sum_i k_{\text{NO}+\text{RO}_2i}[\text{NO}][\text{RO}_2i] - L(\text{O}_3) \quad (3)$$

where  $k$  is a reaction rate coefficient and  $L(\text{O}_3)$  is the loss terms for ozone. In this case, the loss term was only a few tenths  $\text{ppbv hr}^{-1}$  (Fig. S109) and can be neglected. These rates are calculated in  $\text{ppbv min}^{-1}$  and then accumulated at times from 5:45 to 11:15, in order to match the time period over which the DC-8 was sampling the MCS plume. This accumulated ozone production was calculated for the observed  $\text{HO}_2$  plus modeled  $\text{RO}_2$  and for the modeled  $\text{HO}_2$  plus modeled  $\text{RO}_2$ . Modeled  $\text{RO}_2$  is primarily  $\text{CH}_3\text{O}_2$  and  $\text{CH}_3\text{CHO}_2$  and its mixing ratio is half the  $\text{HO}_2$  mixing ratio above 5 km.  $\text{HO}_2$  accounts for a little more than half the total  $\text{O}_3$  production. In order to compare the observed  $\text{O}_3$  change to that accumulated from calculated  $\text{O}_3$  production, an ozone offset of 53.4  $\text{ppbv}$  was added to the accumulated  $\text{O}_3$  production at 6:00 local solar time, which is when the ozone production commenced.

Ozone varied by 5-7  $\text{ppbv}$  over the legs, ~~which were a few hundred km long~~ and was higher on one end of the leg than the other. These variations are smoothed using a 180-minute filter. During the 5 hours from 6:00 to 11:00, the observed  $\text{O}_3$  change was 14  $\text{ppbv}$ , although 2  $\text{ppbv}$  of that change was in the final few minutes of observation. For the same time period, the ozone production calculated from modeled  $\text{HO}_2$  and modeled  $\text{RO}_2$  was 134  $\text{ppbv}$ , and the ozone production calculated from observed  $\text{HO}_2$  and modelled  $\text{RO}_2$  was 44-13  $\text{ppbv}$ . These three methods for determining  $\text{O}_3$  production agree to well within their uncertainties and provide additional confirmation on the observed and modeled  $\text{HO}_2$  and the modeled  $\text{RO}_2$ .

#### 30 4 Discussion

These comparisons between median observed and modeled OH,  $\text{HO}_2$ , and OH reactivity display an agreement that is well within the combined uncertainties of the observations and model. This agreement within uncertainties generally holds in scatter plots and associated statistics and as a function of altitude,  $\text{JO}(\text{D})$ , NO, CO, and the modeled OH reactivity. It also holds for



the wide range of environments encountered during DC3 – different altitudes, cloudiness, and sunlight over roughly one third of the continental United States.

5 A closer look at the figures shows seemingly random differences between observed and modeled OH and HO<sub>2</sub>. While most observed and modeled OH, HO<sub>2</sub>, and OH reactivity one-minute data are within the combined uncertainties (1σ confidence) of each other (57%), there are sometimes persistent unexplained differences (Fig. S1). An example is from the 21 June flight over Missouri and Illinois (Fig. 8). For both OH and HO<sub>2</sub> are periods when the modeled OH and HO<sub>2</sub> are higher than the measurements, lower than the measurements, and equal to the measurements. At the same time, the measured OH reactivity is  
10 sometimes greater than the modeled OH reactivity and sometimes equal to it. These types of discrepancies are proving to be hard to resolve. ~~A simple correlation analysis found no strong correlation between the observed-to-modeled ratio or difference and any model output variable. A simple correlation analysis, in which correlation coefficients are found for the observed-to-modeled ratio or difference with every model output variable, produced no large correlation coefficients.~~ Employing more sophisticated methods in future work may be more productive.

#### 15 4.1 Comparing DC3 to Previous Studies

All previous aircraft studies that included measurements of OH and HO<sub>2</sub> have compared these measurements to calculated values from constrained photochemical box model. There is uncertainty in comparing the results from one study to another because often the instruments, their calibrations, and models are different or have evolved over time. Comparing results from very different environments amplifies this problem. Thus, the comparisons here are restricted to previous studies in air that  
20 was heavily influenced by convection.

NO, CO, O<sub>3</sub>, and JO(<sup>1</sup>D) from DC3 are remarkably similar to those observed in INTEX-A in 2004 during flights over the central and eastern US (Ren et al., 2008) and to those observed from only 7 km to 10 km during HOOVER 2 in summer 2007 during flights over central Europe (Regelin et al., 2013). As in DC3, observed and modeled OH agree to within uncertainties  
25 for INTEX-A and HOOVER 2 over their altitude ranges. On the other hand, observed and modeled HO<sub>2</sub> agree to within uncertainties for DC3, HOOVER 2, and INTEX-A up to 8 km, but then observed HO<sub>2</sub> grows to exceed modeled HO<sub>2</sub> by a factor of 3 at 11 km for INTEX-A, in contrast with both DC3 and HOOVER 2 where observed and modeled HO<sub>2</sub> agree to within the combined uncertainties.

30 One explanation could be the treatment of HO<sub>2</sub>NO<sub>2</sub> formation rate in the model. MCMv3.3.1 uses a reaction rate coefficient that takes the much lower low-temperature reaction rate coefficient of the laboratory study of Bacak et al. (2011) into account, while the JPL evaluation (Burkholder et al., 2015) does not. For DC3, using the MCMv3.3.1 rate coefficient, observed-to-modeled OH and HO<sub>2</sub> are 0.85-0.9 at altitudes above 10 km altitude, and modeled HO<sub>2</sub>NO<sub>2</sub> is 1.9 times measured, but if the

JPL recommended rate is used, then modeled OH and HO<sub>2</sub> both increase by a factor of 1.5 at altitudes above 10 km, shifting the observed-to-modeled ratios to 1.3-1.4, while increasing modeled HO<sub>2</sub>NO<sub>2</sub> to 5-10 times that measured (Fig. [S10S109](#)). The JPL recommended reaction rate coefficient was used in the model for INTEX-A, which could explain some of the difference with DC3, except that observed-to-modeled OH ratio should also be a factor of 3 for INTEX-A. We are left to conclude that either the INTEX-A HO<sub>2</sub> calibration at low pressure was in error or that either the measurements used to constrain the model or the model rate coefficients at low temperature and pressure had errors.

The production rates of HO<sub>x</sub> (Fig. [S11S110](#)) and O<sub>3</sub> (Fig. [S9S98](#)) are comparable to those found in previous studies (Ren et al., 2008; Olson et al., 2012). Modeled HO<sub>x</sub> production is dominated by O<sub>3</sub> photolysis below 8 km, as has been previously observed (Regelin et al., 2013), but HCHO photolysis dominates above 10 km. [HO<sub>x</sub> production by HONO photolysis essentially balances HO<sub>x</sub> loss by HONO formation.](#) The calculated O<sub>3</sub> production rates are also comparable to these other studies, which find production rates of a few ppbv hr<sup>-1</sup> in the PBL and above 10 km with a small loss at mid-altitude (Fig. [S12+](#)). A spike in excess of 5 ppbv hr<sup>-1</sup> was found in a fire plume [on 22 June \(day-of-year 174\)](#), where abundances of both VOCs and NO<sub>x</sub> were enhanced.

#### 15 4.2 Effects of Heterogeneous Chemistry on OH and HO<sub>2</sub>

These DC3 results indicate that a total uptake coefficient is much less than 1 for aerosol. They also suggest that a total uptake coefficient of 0.2 is probably also too high because the model calculates HO<sub>2</sub> values that are much lower than observed HO<sub>2</sub> when the aerosol ~~surface area concentrations~~[surface area per cm<sup>3</sup> of air](#) was greater than 10<sup>-6</sup> cm<sup>2</sup> cm<sup>-3</sup>. In the DC3 environment, HO<sub>x</sub> has substantial gas-phase loss pathways, making it difficult for heterogeneous chemistry to be dominant when the model uses an uptake coefficient consistent with laboratory studies, except at the largest aerosol ~~surface area concentrations~~[surface area per cm<sup>3</sup> of air](#)s. For the case with a total uptake coefficient of 0.2, HO<sub>x</sub> loss including heterogeneous loss is 1.4 times the gas-phase only loss when the aerosol ~~surface area concentrations~~[surface area per cm<sup>3</sup> of air](#) is 5x10<sup>-7</sup> cm<sup>2</sup>cm<sup>-3</sup>, but grows to 1.5 at 1x10<sup>-6</sup> cm<sup>2</sup>cm<sup>-3</sup> and 2.5 for the few one-minute data points when it is greater than 3x10<sup>-6</sup> cm<sup>2</sup>cm<sup>-3</sup>. This increase in HO<sub>x</sub> loss translates into decrease in the modeled HO<sub>x</sub>, with the decrease changing roughly as the square root of the increase in the HO<sub>x</sub> loss.

~~The DC results can also be compared to other studies of heterogeneous effects on HO<sub>2</sub> and OH. In Mauldin et al. (1998), a large difference between the observed and modeled OH was found, but this difference may have been due to the lack of photolysis frequency measurements, which are crucial to test photochemistry in a cloudy environment. In the mountaintop cloud measurements by Whalley et al. (2015), the observed an HO<sub>2</sub> uptake in liquid clouds that was much more significant than the HO<sub>2</sub> uptake on ice observed for DC3. This difference could be due to the surface area concentrations being up to 100 times larger in their study and the drops being liquid and not ice. Also, they appear to have not considered the substantial decrease in the effective uptake coefficient due to large particle size (Tang et al., 2014). On the other hand, these DC3 results~~

of small cloud impacts on HO<sub>2</sub> are consistent with the previous results for the western Pacific Ocean (Olson et al., 2004; Olson et al., 2006). In DC3, the DC-8 spent hours flying in anvils of the cumulus clouds, which consisted of ice particles. DC3 provides evidence that the HO<sub>2</sub> uptake on ice is small. These results are consistent with HO<sub>2</sub> results over the western Pacific Ocean (Olson et al., 2004) but not with those over the northern Atlantic (Jeanglé et al., 2000). In Mauldin et al. (1998), a large difference between the observed and modeled OH was found in clouds, but this difference may have been due to the lack of photolysis frequency measurements, which are crucial to test photochemistry in a cloudy environment. In DC3, the DC-8 spent essentially no time in liquid clouds, for which there is evidence of measurable HO<sub>2</sub> uptake (Olson et al., 2006; Whalley et al., 2015). Thus these DC3 results provide constraints of HO<sub>2</sub> uptake on aerosol and ice particles, but not on liquid water particles.

10

In other cleaner environments or dirtier environments with much high aerosol ~~surface area concentrations~~ surface area per cm<sup>3</sup> of air, heterogeneous chemistry can be a substantial fraction of the entire HO<sub>x</sub> loss and thus ~~strongly~~ affect HO<sub>2</sub> and OH abundances. Measuring OH and HO<sub>2</sub> in these environments will provide a better test of the understanding of HO<sub>2</sub> heterogeneous chemistry than DC3 did.

## 15 5 Conclusions

The general agreement between the observed and modeled OH and HO<sub>2</sub> for the complex DC3 environment is encouraging. It suggests that a photochemical box model can simulate the observed OH and HO<sub>2</sub> to well within combined uncertainties, if properly constrained with measurements of other chemical species, photolysis frequencies, and environmental conditions. On the other hand, it is difficult to explain the unexpected deviations between observed and modeled OH and HO<sub>2</sub>, such as is observed in [Figure- 8](#) or [Figure- S1](#). Neither heterogeneous chemistry nor organic peroxy chemistry are able to explain these deviations.

There are other possible causes for these discrepancies. First, it can be difficult to maintain instrument calibrations for not only OH and HO<sub>2</sub> but also for all the other measurements that were used to constrain the model to calculate OH and HO<sub>2</sub>. Second, the simultaneous measurements need to be properly conditioned so that they can be used as model constraints. This process includes filling in isolated missing values because, if this was not done, the constraining data set would be sparse. For DC3, using the merged data set with no interpolation is less than 10% of the full data set, but the observed and modeled OH and HO<sub>2</sub> have essentially the same relationships as with the interpolated data set (Table S2). Third the model parameters, such as integration times ~~and decay times and time intervals~~, must be set up so that the model calculations represent the observations and their variations. ~~Varying these times caused a range of modeled values that was far smaller than the large observed-to-modeled differences, as seen in Fig. S1.~~ For DC3, the one-minute data are adequate for the timescale of variations for most cases, except in small fire plumes and ~~some~~ spikes in lightning NO<sub>x</sub> in the anvil. Fourth, multiple methods are needed to determine if differences between observations and model are significant. For DC3, the comparisons between observations and

30

models are robust despite the method of comparison. Thus, none of these appear to be the cause of the unexplained deviations between observed and modeled OH and HO<sub>2</sub>. [A more thorough model uncertainty and sensitivity analysis could unveil the cause.](#)

5 ~~For DC3 and all previous studies, improvements in the measurements and models would enable better testing of the understanding of atmospheric oxidation chemistry that the model should represent and therefore ultimately improve that understanding.~~ Even with these observed-to-modeled discrepancies, [the general agreement for observed and modeled OH and HO<sub>2</sub> suggests that current photochemical models can simulate observed atmospheric oxidation processes even around clouds to within these combined uncertainties.](#) ~~For DC3 and all previous studies, improvements in the measurements and models would enable better testing of the understanding of atmospheric oxidation chemistry that the model should represent and therefore ultimately improve that understanding.~~ [these results provide strong evidence that current photochemical models can generally simulate observed atmospheric oxidation processes even in the free troposphere during the DC3 study, even around clouds.](#) [Reducing these uncertainties will enable comparisons of observed and modeled OH and HO<sub>2</sub> to provide a more stringent test of the understanding of atmospheric oxidation chemistry and thus to lead to an improvement in that understanding.](#)

10

## 15 **Code Availability**

The Matlab code used for the zero-dimensional photochemical box modelling with the MCMv3.3.1 mechanism can be downloaded from the website <https://sites.google.com/site/wolfegm/models>. The manuscript describing this model is Wolfe, G.M, M.R. Marvin, S.J. Roberts, K.R. Travis, and J. Liao, The Framework for 0-D Atmospheric Modeling (F0AM) v3.1, *Geoscientific Model Development*, 9, 3309-3319, doi: 10.5194/gmd-9-3309-2016, 2016.

## 20 **Data Availability**

The merge file for the DC3 DC-8 data and the updated OH, HO<sub>2</sub>, and OH reactivity numbers can be accessed from <http://data.eol.ucar.edu/> or <http://www-air.larc.nasa.gov/cgi-bin/ArcView/dc3-seac4rs>, doi:10.5067/Aircraft/DC3/DC8/Aerosol-TraceGas

## **Author Contribution**

25 All authors contributed DC3 measurements that are critical for the modeling and comparison of modeled and measured OH and HO<sub>2</sub> in this manuscript. W. Brune wrote the manuscript and made edits provided by the co-authors before submitting the manuscript.

## **Competing Interests**

The authors declare that they have no conflicts of interest.

## Acknowledgments

The Deep Convective Clouds and Chemistry (DC3) experiment is sponsored by the U.S. National Science Foundation (NSF), the National Aeronautics and Space Administration (NASA), the National Oceanic and Atmospheric Administration (NOAA), and the Deutsches Zentrum fuer Luftund Raumfahrt (DLR). Archived field data can be accessed from <http://data.eol.ucar.edu/> or <http://www-air.larc.nasa.gov/cgi-bin/ArcView/dc3-seac4rs>. Data provided by NCAR/EOL are supported by the National Science Foundation. Acetone/propanal measurements aboard the DC-8 during DC3 were supported by the Austrian Federal Ministry for Transport, Innovation, and Technology (BMVIT) through the Austrian Space Applications Programme (ASAP) of the Austrian Research Promotion Agency (FFG). Support for ATHOS and OHR measurements aboard the NASA DC-8 during DC3 comes from NASA grant NNX12AB84G. We thank NASA management, pilots, and operations personnel for the opportunity to gather these observations, the people of Salina, KS for hosting us and providing excellent facilities, G. Wolfe for his publically available FOAM model framework, and the University of Leeds for the publically available MCMv3.3.1 photochemical model. We also thank J. Thornton for his insights into HO<sub>2</sub> heterogeneous chemistry, and P. Lawson, P. Wennberg, J. Crouse, and J. St. Clair for the use of their measurements.

## References

- 15 Apel, E. C.; Olson, J. R.; Crawford, J. H., Hornbrook, R.S., Hills, A.J., Cantrell, C.A., Emmons, L.K., Knapp, D.J., Hall, S., Mauldin, R.L., Weinheimer, A.J., Fried, A., Blake, D.R., Crouse, J.D., St Clair, J.M., Wennberg, P.O., Diskin, G.S., Fuelberg, H.E., Wisthaler, A., Mikoviny, T., Brune, W., Riemer, D.D., Impact of the deep convection of isoprene and other reactive trace species on radicals and ozone in the upper troposphere, *Atmospheric Chemistry and Physics*, 12, 1135-1150, DOI: 10.5194/acp-12-1135-2012, 2012.
- 20 Apel, E.C., Hornbrook, R.S., Hills, A.J., Blake, N.J., Barth, M.C., Weinheimer, A., Cantrell, C., Rutledge, S.A., Basarab, B., Crawford, J., Diskin, G., Homeyer, C.R., Campos, T., Flocke, F., Fried, A., Blake, D.R., Brune, W., Pollack, I., Peischl, J., Ryerson, T., Wennberg, P.O., Crouse, J.D., Wisthaler, A., Mikoviny, T., Huey, G., Heikes, B., O'Sullivan, D., and Riemer, D.D., Upper tropospheric ozone production from lightning NO<sub>x</sub>-impacted convection: Smoke ingestion case study from the DC3 campaign. *Journal of Geophysical Research-Atmospheres*, 120 (6):2505-2523, 2015.
- 25 [Assaf, E., Sheps, L., Whalley, L., Heard, D., Tomas, A., Schoemaeker, C., Fittschen, C., The Reaction between CH<sub>3</sub>O<sub>2</sub> and OH Radicals: Product Yields and Atmospheric Implications, \*Environ. Sci. Technol.\*, 51, 2170–2177, 2017, DOI: 10.1021/acs.est.6b06265.](#)
- Bacak, A., Cooke, M. C., Bardwell, M. W., McGillen, M. R., Archibald, A. T., Huey, L. G., Tanner, D., Utembe, S. R., Jenkin, M. E., Derwent, R. G., et al., Kinetics of the HO<sub>2</sub> + NO<sub>2</sub> Reaction: On the Impact of New Gas-Phase Kinetic Data for the Formation of HO<sub>2</sub>NO<sub>2</sub> on HO<sub>x</sub>, NO<sub>x</sub> and HO<sub>2</sub>NO<sub>2</sub> Levels in the Troposphere, *Atmos. Environ.*, 45, 6414-6422, 2014.
- 30 Barth, M.C., Cantrell, C.A., Brune, W.H., Rutledge, S.A., Crawford, J.H., Huntrieser, H., Carey, L.D., MacGorman, D., Weisman, M., Pickering, K.E., Bruning, E., Anderson, B., Apel, E., Biggerstaff, M., Campos, T., Campuzano-Jost, P. Cohen,

- R., Crouse, J., Day, D.A., Diskin, G., Flocke, F., Fried, A., Garland, C., Heikes, B., Honomichl, S., Hornbrook, R., Huey, L.G., Jimenez, J.L., Lang, T., Lichtenstern, M., Mikoviny, T., Nault, B., O'Sullivan, D., Pan, L.L., Peischl, J., Pollack, I., Richter, D., Riemer, D., Ryerson, T., Schlager, H., St Clair, J., Walega, J., Weibring, P., Weinheimer, A., Wennberg, P., Wisthaler, A., Wooldridge, P.J., and Ziegler, C., The Deep Convective Clouds and Chemistry (DC3) Field Campaign, *Bulletin of the American Meteorological Society*, 96, 1281-1309, 2015.
- Barth, M.C., Bela, M.M., Fried, A., Wennberg, P.O., Crouse, J.D., St Clair, J.M., Blake, N.J., Blake, D.R., Homeyer, C.R., Brune, W.H., Zhang, L., Mao, J., Ren, X., Ryerson, T.B., Pollack, I.B., Peischl, J., Cohen, R.C., Nault, B.A., Huey, L.G., Liu, X., and Cantrell, C.A., Convective transport and scavenging of peroxides by thunderstorms observed over the central US during DC3, *J. Geophys. Res. Atmos.*, 121, 4272-4295, 2016.
- 10 [Bernt, T., W. Scholz, B. Mentler, L. Fischer, H. Herrmann, M. Kumala, and A. Hansel, Accretion Product Formation from Self- and Cross-Reactions of RO<sub>2</sub> Radicals in the Atmosphere, \*Angew. Chem. Int. Ed.\*, 57, 3820–3824, 2018, DOI: 10.1002/anie.201710989.](#)
- Bozem, H., Fischer, H., Gurk, C., Schiller, C. L., Parchatka, U., Koenigstedt, R., Stickler, A., Martinez, M., Harder, H., Kubistin, D., Williams, J., Eerdeken, G., and Lelieveld, J., Influence of corona discharge on the ozone budget in the tropical free troposphere: a case study of deep convection during GABRIEL, *Atmos. Chem. Phys.*, 14, 8917-8931, doi.org/10.5194/acp-14-8917-2014, 2014.
- Burkholder, J.B., Sander, S.P., Abbatt, J., Barker, J.R., Huie, R.E., Kolb, C.E., Kurylo, M.J., Orkin, V.L., Wilmouth, D.M., and Wine, P.H., "Chemical Kinetics and Photochemical Data for Use in Atmospheric Studies, Evaluation No. 18," JPL Publication 15-10, Jet Propulsion Laboratory, Pasadena, 2015, <http://jpldataeval.jpl.nasa.gov>, 2015.
- 20 [Cazorla M, Wolfe GM, Bailey SA, Swanson AK, Arkinson HL, Hanisco TF. A new airborne laser-induced fluorescence instrument for in situ detection of formaldehyde throughout the troposphere and lower stratosphere. \*Atmos Meas Tech.\* 2015;8:541–552. doi: 10.5194/amt-8-541-2015.](#)
- Chen, S., Brune, W.H., Oluwole, O.O., Kolb, C.E., Bacon, F., Li, G.Y., Rabitz, H., Global Sensitivity Analysis of the Regional Atmospheric Chemical Mechanism: An Application of Random Sampling-High Dimensional Model Representation to Urban Oxidation Chemistry, *Environmental Science and Technology*, 46, 11162-11170 DOI: 10.1021/es301565w, 2012.
- Chatfield, R. B., and Crutzen, P.J., Sulfur dioxide in remote oceanic air: Cloud transport of reactive precursors, *J. Geophys. Res.*, 89, 7111–7132, doi:10.1029/JD089iD05p07111, 1984.
- Christian, K. E., Brune, W.H., and Mao, J.Q., Global sensitivity analysis of the GEOS-Chem chemical transport model: ozone and hydrogen oxides during ARCTAS (2008). *Atmospheric Chemistry and Physics*, 17, 3769-3784, 2017.
- 30 [Colman, J.J., A.J. Swanson, S. Meinardi, B.C. Sive, D.R. Blake, and F.S. Rowland, Description of the Analysis of a Wide Range of Volatile Organic Compounds in Whole Air Samples Collected during PEM-Tropics A and B, \*Anal. Chem.\*, 73, 3723-3731, 2001.](#)
- Crawford, J; Olson, J., Davis, D., Chen, G., Barrick, J., Shetter, R., Lefer, B., Jordan, C., Anderson, B., Clarke, A., Sachse, G., Blake, D., Singh, H., Sandolm, S., Tan, D., Kondo, Y., Avery, M. Flocke, F., Eisele, F., Mauldin, L. Zondlo, M., Brune, W.,

- Harder, H., Martinez, M., Talbot, R., Bandy, A., Thornton, D., Clouds and trace gas distributions during TRACE-P, *J. Geophys. Res. Atmos.*, 108 (D21), art. no.-8818, 2003.
- [Crouse, J. D., K. A. McKinney, A. J. Kwan, and P. O. Wennberg, Measurement of gas-phase hydroperoxides by chemical ionization mass spectrometry, \*Anal. Chem.\*, 78\(19\), 6726-6732, 2006](#)
- 5 Day, D.A., P. J. Wooldridge, M. B. Dillon, J. A. Thornton, and R. C. Cohen, A thermal dissociation laser-induced fluorescence instrument for in situ detection of NO<sub>2</sub>, peroxy nitrates, alkyl nitrates, and HNO<sub>3</sub>, *J. Geophys. Res.* 107, 4046, 2002.
- DC3 Data, doi: 10.5067/Aircraft/DC3/DC8/Aerosol-TraceGas, 2017.
- Faloona, I.C., Tan, D., Leshner, R.L., Hazen, N.L., Frame, C.L., Simpas, J.B., Harder, H., Martinez, M., Di Carlo, P., Ren, X.R., Brune, W.H., A laser-induced fluorescence instrument for detecting tropospheric OH and HO<sub>2</sub>: Characteristics and calibration, *J. Atmos. Chem.*, **47**, 139-167, 2004.
- 10 Feiner, P.A., Brune, W.H., Miller, D.O., Zhang, L., Cohen, R.C., Romer, P.S., Goldstein, A.H., Keutsch, F.N., Skog, K.M., Wennberg, P.O., Nguyen, T.B., Teng, A.P., DeGouw, J., Koss, A., Wild, R.J., Brown, S.S., Guenther, A., Edgerton, E., Baumann, K., and Fry, J.L., Testing Atmospheric Oxidation in an Alabama Forest. *Journal of the Atmospheric Sciences*, 73 (12):4699-4710, 2016.
- 15 Fuchs, H., Bohn, B., Hofzumahaus, A., Holland, F., Lu, K. D., Nehr, S., Rohrer, F., and Wahner, A. (2011), Detection of HO<sub>2</sub> by laser-induced fluorescence: Calibration and interferences from RO<sub>2</sub> radicals, *Atmos. Meas. Tech.*, 4, 1209–1225.
- Fuchs, H., Novelli, A., Rolletter, M., Hofzumahaus, A., Pfannerstill, E. Y., Kessel, S., Edtbauer, A., Williams, J., Michoud, V., Dusanter, S., Locoge, N., Zannoni, N., Gros, V., Truong, F., Sarda-Estève, R., Cryer, D. R., Brumby, C. A., Whalley, L. K., Stone, D., Seakins, P. W., Heard, D. E., Schoemaeker, C., Blocquet, M., Coudert, S., Batut, S., Fittschen, C., Thames, A. B., Brune, W. H., Ernest, C., Harder, H., Müller, J. B. A., Elste, T., Kubistin, D., Andres, S., Bohn, B., Hohaus, T., Holland, F., Li, X., Rohrer, F., Kiendler-Scharr, A., Tillmann, R., Wegener, R., Yu, Z., Zou, Q., and Wahner, A., Comparison of OH reactivity measurements in the atmospheric simulation chamber SAPHIR, *Atmos. Meas. Tech.*, 10, 4023-4053, <https://doi.org/10.5194/amt-10-4023-2017>, 2017.
- 20 Hard, T. M., O'Brian, R. J., Chan, C. Y., and Mehrabzadeh, A. A., Tropospheric free radical determination by FAGE, *Environ. Sci. Technol.*, 18, 768–777, 1984.
- 25 [Huey, L. G., Measurement of trace atmospheric species by chemical ionization mass spectrometry: Speciation of reactive nitrogen and future directions, \*Mass Spectrom. Rev.\*, 26\(2\), 166-184, 2007.](#)
- Jacob, D.J., Heterogeneous chemistry and tropospheric ozone, *Atm. Environ.*, 34, 2131-2159, 2007.
- Jaeglé, L., et al., Observed OH and HO<sub>2</sub> in the upper troposphere suggest a major source from convective injection of peroxides, *Geophys. Res. Lett.*, 24, 3181–3184, doi:10.1029/97GL03004, 1997.
- 30 Jaeglé, L., Jacob, D., Brune, W., Faloona, I., Tan, D., Heikes, B., Kondo, Y., Sachse, G., Anderson, B., Gregory, G., Singh, H., Poeschel, R., Ferry, G., Blake, D., Shetter, R., Photochemistry of HO<sub>x</sub> in the upper troposphere at northern latitudes. *J. Geophys. Res.*, 105, 3877-3892, 2000.



- Jenkin, M. E., Saunders, S. M., Wagner, V., and Pilling, M. J., Protocol for the development of the Master Chemical Mechanism, MCM v3 (Part B): tropospheric degradation of aromatic volatile organic compounds, *Atmos. Chem. Phys.*, 3, 181-193, <https://doi.org/10.5194/acp-3-181-2003>, 2003.
- Kovacs, T., and Brune, W., Total OH Loss Rate Measurement. *J. Atmos. Chem.*, 39, 105-122, 2001.
- 5 Kubistin, D., Harder, H., Martinez, M., Rudolf, M., Sander, R., Bozem, H., Eerdeken, G., Fischer, H., Gurk, C., Kluepfel, T., Koenigstedt, R., Parchatka, U., Schiller, C.L., Stickler, A., Taraborrelli, D., Williams, J., and Lelieveld, J., Hydroxyl radicals in the tropical troposphere over the Suriname rainforest: comparison of measurements with the box model MECCA, *Atmos. Chem. Phys.*, 10, 9705-9778, doi:10.5194/acp-10-9705-2010, 2010.
- Lakey, P.S.J, George, I.J., Baeza-Romero, M.T., Whalley, L.K., and Heard, D.E., Organics Substantially Reduce HO<sub>2</sub> Uptake onto Aerosols Containing Transition Metal ions, *J. Phys. Chem. A*, 120, 1421–1430, DOI: 10.1021/acs.jpca.5b06316, 2015.
- 10 Lakey P.S.J., Berkemeier, T., Krapf, M., Dommen, J., Steimer, S.S., Whalley, L.K., Ingham, T., Baeza-Romero, M.T., Pöschl, U., Shiraiwa, M., Ammann, M., Heard, D.E., The effect of viscosity and diffusion on the HO<sub>2</sub> uptake by sucrose and secondary organic aerosol particles, *Atmospheric Chemistry and Physics*, 16, 13035-13047, 2016.
- Logan, J. A., Prather, M. J., Wofsy, S. C., and McElroy, M. B., Tropospheric chemistry: A global perspective, *J. Geophys. Res.*, 86, 7210–7254, 1981.
- 15 Mao J., Ren, X., Brune, W.H., Olson, J.R., Crawford, J.H., Fried, A., Huey, L.G., Cohen, R.C., Heikes, B., Singh, H.B., Blake, D.R., Sachse, G.W., Diskin, G.S., Hall, S.R., and Shetter, R.E., Airborne measurement of OH reactivity during INTEX-B, *Atmospheric Chemistry and Physics*, 9, 163-173, 2009.
- Mao, J., Ren, X., Zhang, L., Van Duin, D.M., Cohen, R.C., Park, J.-H., Goldstein, A.H., Paulot, F., Beaver, M.R., Crouse, J.D., Wennberg, P.O., DiGangi, J.P., Henry, S.B., Keutsch, F.N., Park, C., Schade, G.W., Wolfe, G.M., Thornton, J.A., and Brune, W.H., Insights into hydroxyl measurements and atmospheric oxidation in a California forest, *Atmos. Chem. Phys.*, 12, 8009–8020, 2012.
- 20 Mao J., Jacob, D.J., Evans, M.J., Olson, J.R., Ren, X., Brune, W.H., St. Clair, J.M., Crouse, J.D., Spencer, K.M., Beaver, M.R., Wennberg, P.O., Cubison, M.J., Jimenez, J.L., Fried, A., Weibring, P., Walega, J.G., Hall, S.R., Weinheimer, A.J., Cohen, R.C., Chen, G., Crawford, J.H., McNaughton, C., Clarke, A.D., Jaegl'e, L., Fisher, J.A., Yantosca, R.M., Le Sager, P., and Carouge, C., Chemistry of hydrogen oxide radicals (HOx) in the Arctic troposphere in spring, *Atmospheric Chemistry and Physics*, 10, 5823-5838, 2010.
- Mauldin III, R. L., Tanner, D. J., Frost, G. J., Chen, G., Prevot, A. S. H., Davis, D. D., and Eisele, F. L., OH measurements during ACE-1: observations and model comparisons, *J. Geophys. Res. Atmos.*, 103, 16713–16729, 1998.
- 30 Mielke, L.H., D. E. Erickson, S. A. McLuckey, M. Müller, A. Wisthaler, A. Hansel, P. B. Shepson, Development of a Proton-Transfer Reaction-Linear Ion Trap Mass Spectrometer for Quantitative Determination of Volatile Organic Compounds, *Anal. Chem* 80(21), 8171-8177, DOI:10.1021/ac801328d, 2008
- Nault, B.A., Garland, C., Wooldridge, P.J., Brune, W.H., Campuzano-Jost, J., Crouse, J.D., Day, D.A., Dibb, J., Hall, S.R., Huey, L.G., Jimenez, J.L., Liu, X.X., Mao, J.Q., Mikoviny, T., Peischl, J., Pollack, I.B., Ren, X.R., Ryerson, T.B., Scheuer,



- E., Ullmann, K., Wennberg, P.O., Wisthaler, A., Zhang, L., and Cohen, R.C., Observational Constraints on the Oxidation of NO<sub>x</sub> in the Upper Troposphere, *Journal of Physical Chemistry a*, 120 (9):1468-1478, 2016.
- Nault, B. A., Laughner, J. L., Wooldridge, P. J., Crouse, J. D., Dibb, J., Diskin, G., ... Cohen, R. C., Lightning NO<sub>x</sub> emissions: reconciling measured and modeled estimates with updated NO<sub>x</sub> chemistry. *Geophysical Research Letters*, 44, 9479–9488.  
5 [https://doi.org/ 10.1002/2017GL074436](https://doi.org/10.1002/2017GL074436), 2017.
- Olson, J. R., et al., Testing fast photochemical theory during TRACE-P based on measurements of OH, HO<sub>2</sub>, and CH<sub>2</sub>O, *J. Geophys. Res.*, 109, D15S10, doi:10.1029/2003JD004278, 2004.
- Olson, J. R., Crawford, J.H., Chen, G., Brune, W.H., Faloona, I.C., Tan, D., Harder, H., and Martinez, M., A reevaluation of airborne HO<sub>x</sub> observations from NASA field campaigns, *J. Geophys. Res., Atmos.*, 111, D10301,  
10 doi:10.1029/2005JD006617, 2006.
- Olson, J.R., Crawford, J.H., Brune, W., Mao, J., Ren, X., Fried, A., Anderson, B., Apel, E., Beaver, M., Blake, D., Chen, G., Crouse, J., Dibb, J., Diskin, G., Hall, S.R., Huey, L.G., Knapp, D., Richter, D., Riemer, D., St. Clair, J., Ullmann, K., Walega, J., Weibring, P., Weinheimer, A., Wennberg, P., and Wisthaler, A., An analysis of fast photochemistry over high northern latitudes during spring and summer using in-situ observations from ARCTAS and TOPSE, *Atmos. Chem. Phys.*,  
15 12, 6799-6825, <https://doi.org/10.5194/acp-12-6799-2012>, 2012.
- Pickering, K. E., Thompson, A.M., Dickerson, R.R., Luke, W.T., McNamara, D.P., Greenberg, J.P., and Zimmerman, P.R., Model calculations of tropospheric ozone production potential following observed convective events, *J. Geophys. Res.*, 95, 14 049–14 062, doi:10.1029/JD095iD09p14049, 1990.
- [Pollack, I. B., B. M. Lerner, and T. B. Ryerson, Evaluation of ultraviolet light-emitting diodes for detection of atmospheric NO<sub>2</sub> by photolysis-chemiluminescence, \*J. Atmos. Chem.\*, 65\(2\), 111–125, doi:10.1007/s10874-011-9184-3, 2001.](#)  
20
- Pollack, I. B., et al., Airborne quantification of upper tropospheric NO<sub>x</sub> production from lightning in deep convective storms over the United States Great Plains, *J. Geophys. Res. Atmos.*, 121, 2002–2028, doi:10.1002/ 2015JD023941, 2016.
- Ravetta, F., Jacob, D.J., Brune, W.H., Tan, D., Faloona, I.F., Heikes, B.J., Anderson, B., Blake, D.R., Gregory, G.L., Sachse, G.W., Sandholm, S.T., Shetter, R.E., Singh, H.E., Talbot, R.W., Experimental evidence for the importance of convected methylhydroperoxide as a source of hydrogen oxide ( HO<sub>x</sub> ) radicals in the tropical upper troposphere. *J. Geophys. Res.*,  
25 106, 32,709, 2001.
- Regelin, E., Harder, H., Martinez, M., Kubistin, D., Tatum Ernest, C., Bozem, H., Klippel, T., Hosaynali-Beygi, Z., Fischer, H., Sander, R., Jöckel, P., Königstedt, R., and Lelieveld, J., HO<sub>x</sub> measurements in the summertime upper troposphere over Europe: a comparison of observations to a box model and a 3-D model, *Atmos. Chem. Phys.*, 13, 10703-10720,  
30 <https://doi.org/10.5194/acp-13-10703-2013>, 2013.
- Ren, X.R., Olson, J.R., Crawford, J.H, Brune, W.H., Mao, J.Q., Long, R.B., Chen, Z., Chen, G., Avery, M.A., Sachse, G.W., Barrick, J.D., Diskin, G.S., Huey, L.G., Fried, A., Cohen, R.C., Heikes, B., Wennberg, P.O., Singh, H.B., Blake, D.R., Shetter, R.E., HO<sub>x</sub> chemistry during INTEX-A 2004: Observation, model calculation, and comparison with previous studies, *J. Geophys. Res. Atmos.*, 113, D5, doi: D05319, 2008.

- Ren, X., Mao, J., Brune, W.H., Cantrell, C.A., Mauldin, R.L., Hornbrook, R.S., Kosciuch, E., Olson, J.R., Crawford, J.H., Chen, G., Singh, H.B., Airborne intercomparison of HO<sub>x</sub> measurements using laser-induced fluorescence and chemical ionization mass spectrometry during ARCTAS, *Atmospheric Measurement Techniques*, 5, 2025-2037, DOI: 10.5194/amt-5-2025-2012, 2012.
- 5 Ridley, B. A., Dye, J., Walega, J.G., Zheng, J., Grahek, F.E., and Rison, W., On the production of active nitrogen by thunderstorms over New Mexico, *J. Geophys. Res., Atmos.*, 101, 20,985–21,005, doi:10.1029/96JD01706, 1996.
- [Ryerson, T. B., E. J. Williams, and F. C. Fehsenfeld, An efficient photolysis system for fast-response NO<sub>2</sub> measurements, J. Geophys. Res., 105, 26,447–26,461, 2000.](#)
- [Sachse, G. W., J. E. Collins, G. F. Hill, L. O. Wade, L. G. Burney, and J. A. Ritter, Airborne tunable diode-laser sensor for high-precision concentration and flux measurements of carbon-monoxide and methane, Proc. SPIE, 1433, 157–166, 1991.](#)
- 10 [Vay, S. A., B. E. Anderson, G. W. Sachse, J. E. Collins, Jr., J. R. Podolske, C. H. Twohy, B. Gandrud, K. R. Chan, S. L. Baughcum, and H. A. Wallio, DC-8-based observations of aircraft CO, CH<sub>4</sub>, N<sub>2</sub>O, and H<sub>2</sub>O\(g\) emission indices during SUCCESS, Geophys. Res. Lett., 25, \(10\), 1717-1720, 1998.](#)
- Saunders, S. M., Jenkin, M. E., Derwent, R. G., and Pilling, M. J., Protocol for the development of the Master Chemical Mechanism, MCM v3 (Part A): tropospheric degradation of non-aromatic volatile organic compounds, *Atmos. Chem. Phys.*, 3, 161-180, <https://doi.org/10.5194/acp-3-161-2003>, 2003.
- 15 Schumann, U., and Huntrieser, H., The global lightning-induced nitrogen oxides source, *Atmos. Chem. Phys.*, 7(14), 3823–3907, 2007.
- Stone, D., Evans, M.J., Commane, R., Ingham, T., Floquet, C.F.A., McQuaid, J.B., Brookes, D.M., Monks, P.S., Purvis, R., Hamilton, J.F., Hopkins, J., Lee, J., Lewis, A.C., Stewart, D., Murphy, J.G., Mills, G., Oram, D., Reeves, C.E., and Heard, D.E., HO<sub>x</sub> observations over West Africa during AMMA: impact of isoprene and NO<sub>x</sub>, *Atmos. Chem. Phys.*, 10, 9415-9429, doi:10.5194/acp-10-9415-2010, 2010.
- 20 Stone, D., Whalley, L.K., and Heard, D.E., Tropospheric OH and HO<sub>2</sub> radicals: field measurements and model comparisons, *Chem. Soc. Rev.*, 41, 6348–6404, 2014.
- 25 Tang, M.J., R.A. Cox, and M. Kalberer (2014), Compilation and evaluation of gas phase diffusion coefficients of reactive trace gases in the atmosphere: volume 1. Inorganic compounds, *Atmos. Chem. Phys.* 14, 9233-9247, doi:10.5194/acp-14-9233-2014.
- Thompson, A.M., and Stewart, R.W., Effect of chemical kinetics uncertainties on calculated constituents in a tropospheric photochemical model, *J. Geophys. Res., Atmos.*, 96, 13089-13108, doi: 10.1029/91JD01056, 1991.
- 30 [Thornton, J.A., P. J. Wooldridge, and R. C. Cohen, Atmospheric NO<sub>2</sub>: In Situ Laser-Induced Fluorescence Detection at Parts per Trillion Mixing Ratios, Anal. Chem. 72, 528–539, 2000.](#)
- Thornton, J. A., Jaegle, L., and McNeill, V.F., Assessing known pathways for HO<sub>2</sub> loss in aqueous atmospheric aerosols: Regional and global impacts on tropospheric oxidants, *J. Geophys. Res., Atmos.*, 113, D05303, doi:10.1029/2007JD009236, 2008.

- Wennberg, P.O., et al., Hydrogen radicals, nitrogen radicals, and the production of O<sub>3</sub> in the upper troposphere, *Science*, 279, 49-53, 1998.
- Whalley, L. K., Stone, D., George, I. J., Mertes, S., van Pinxteren, D., Tilgner, A., Herrmann, H., Evans, M. J., and Heard, D. E. (2015), The influence of clouds on radical concentrations: observations and modelling studies of HO<sub>x</sub> during the Hill Cap Cloud Thuringia (HCCT) campaign in 2010, *Atmos. Chem. Phys.*, 15, 3289-3301, <https://doi.org/10.5194/acp-15-3289-2015>.
- Wolfe, G.M, Marvin, M.R., Roberts, S.J., Travis, K.R., and Liao, J., The Framework for 0-D Atmospheric Modeling (F0AM) v3.1, *Geoscientific Model Development*, 9, 3309-3319, doi: 10.5194/gmd-9-3309-2016, 2016.
- York, D., N. Evensen, M. Martinez, J. Delgado, Unified equations for the slope, intercept, and standard errors of the best straight line" *Am. J. Phys.* 72 (3), 2004.

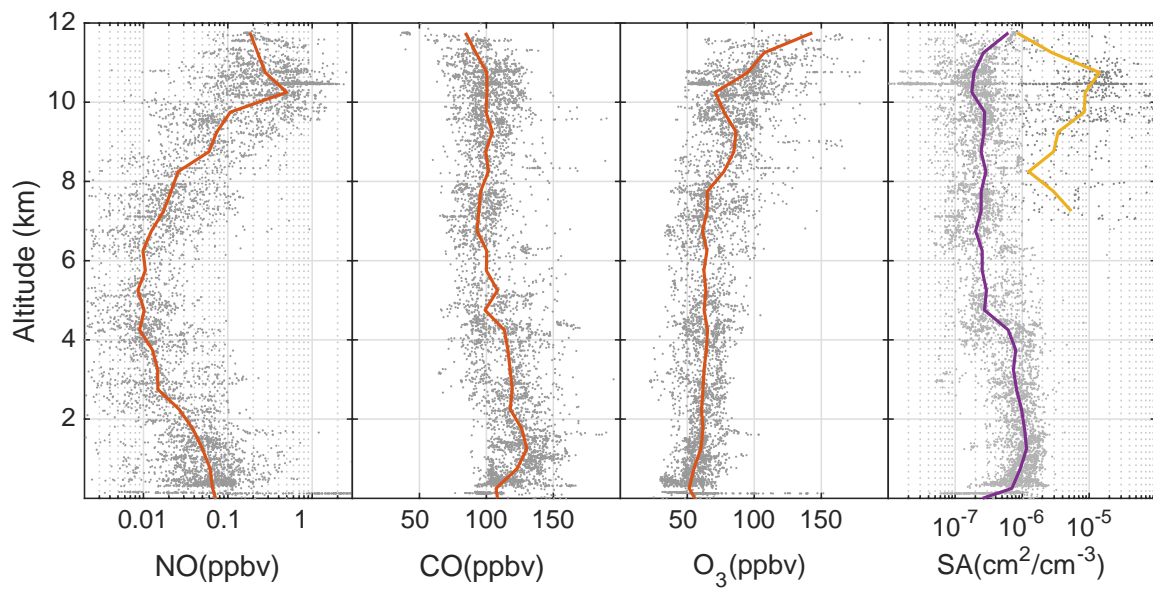

**Figure 1.** Altitude profiles of median NO, CO, O<sub>3</sub>, and aerosol (purple) and ice (yellow) surface area (SA). Grey points are individual one-minute data, while median values are represented by the lines. These data are for the entire DC3 study.

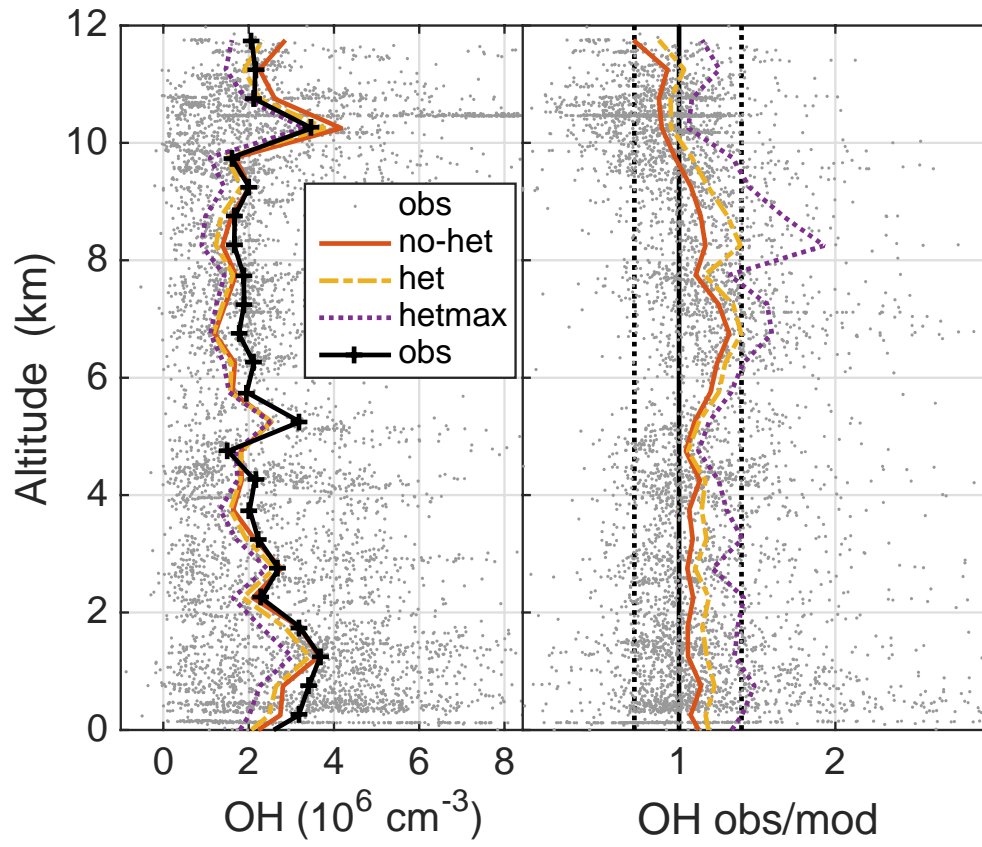

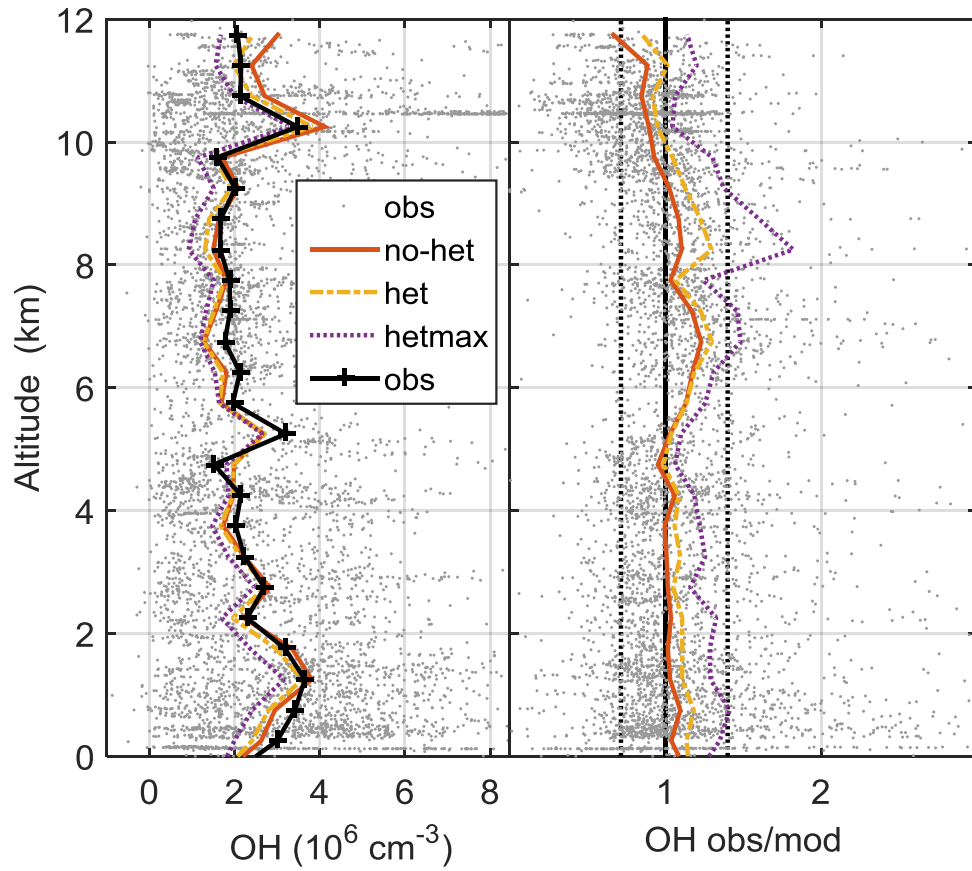

**Figure 2.** Median measured and modeled OH as a function of altitude (left); median ratio of observed-to-modeled OH as a function of altitude (right) for the three models. Gray points are individual 1-minute OH observations and ratios of observed-to-no-heterogeneous modeled OH. Dotted vertical black lines on right (1/1.4, 1.4) are approximate indicators of measurement-model agreement.

5

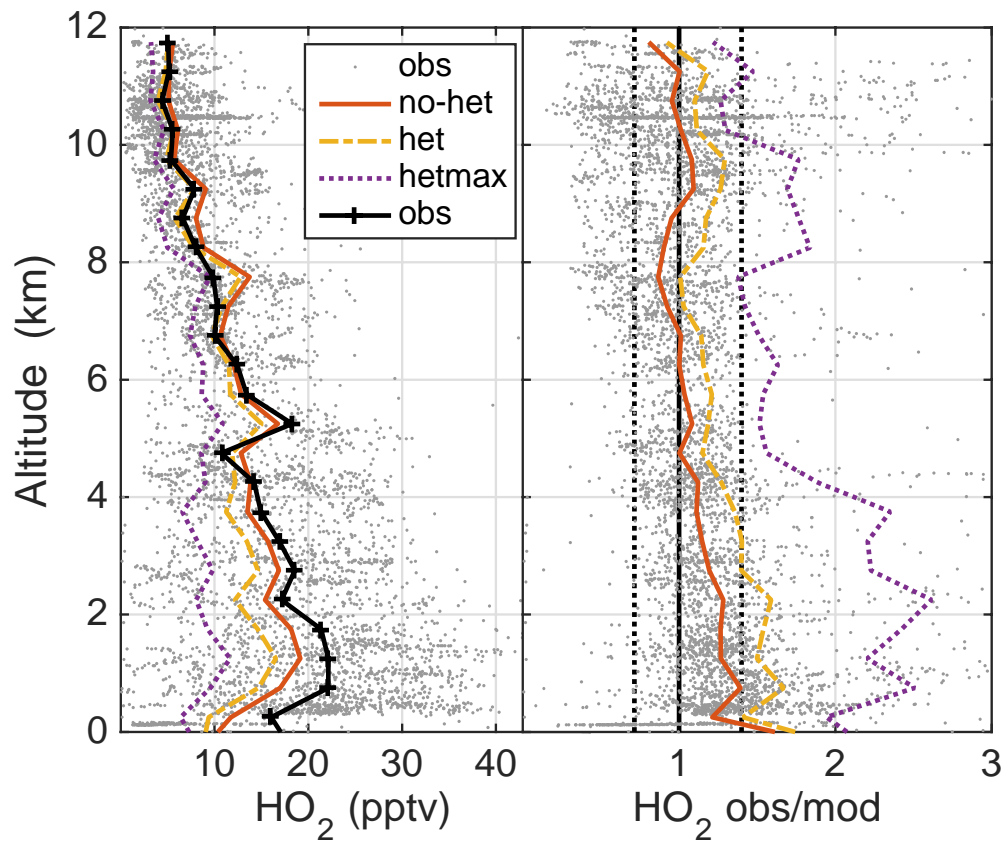

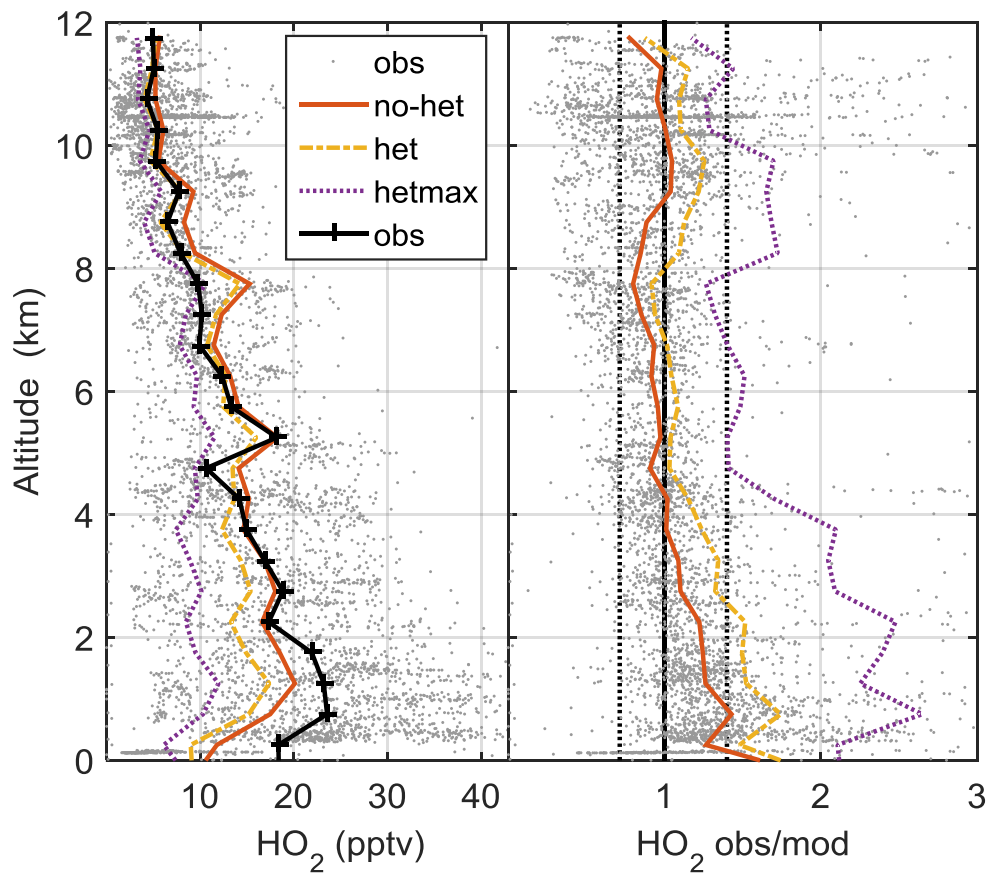

**Figure 3.** Median measured and modeled HO<sub>2</sub> as a function of altitude (left); median ratio of observed-to-modeled HO<sub>2</sub> as a function of altitude (right) for the three models. Gray points are individual 1-minute OH observations and ratios of observed-to-no-heterogeneous modeled OH. Dotted vertical black lines on right (1/1.4, 1.4) are approximate indicators of measurement-model agreement.

5



**OH ( $10^6 \text{cm}^{-3}$ )**

**HO<sub>2</sub> (pptv)**

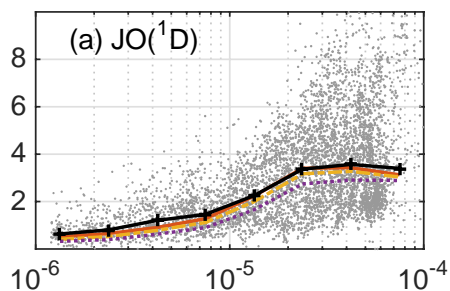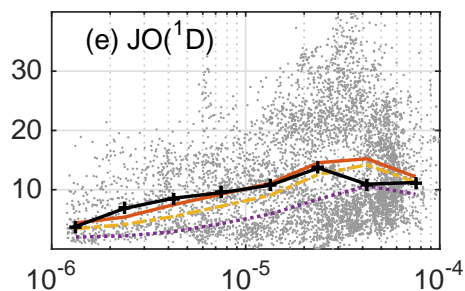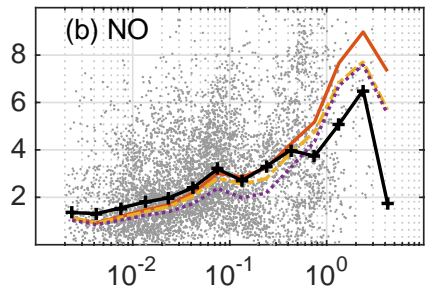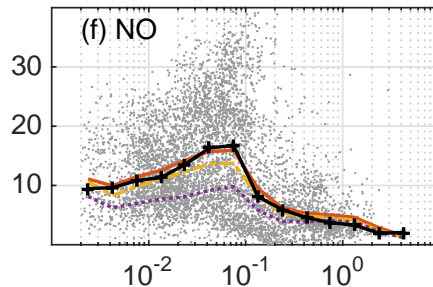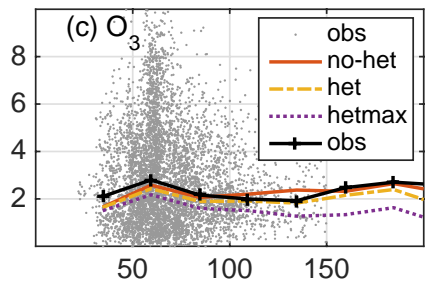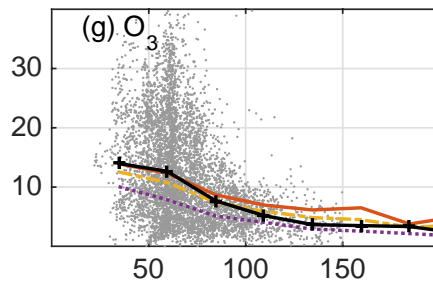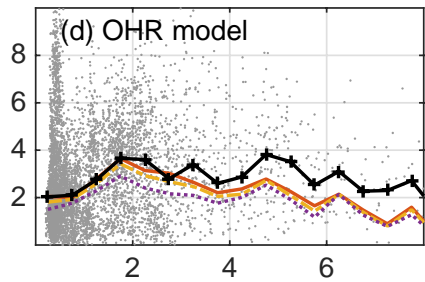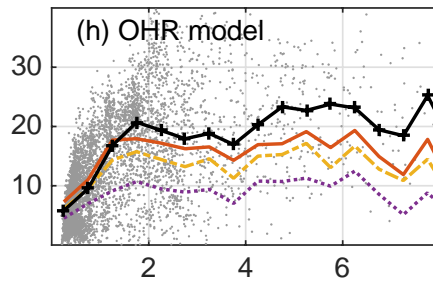

OH ( $10^6 \text{cm}^{-3}$ )

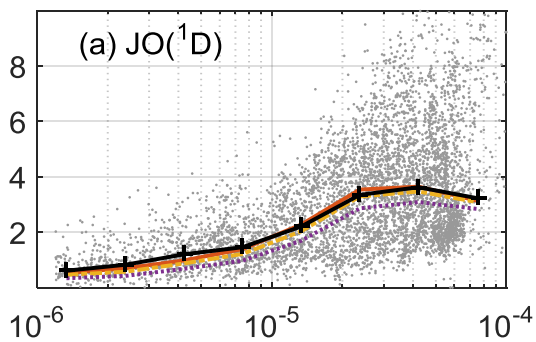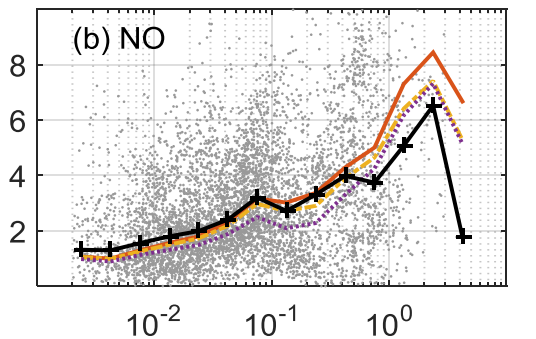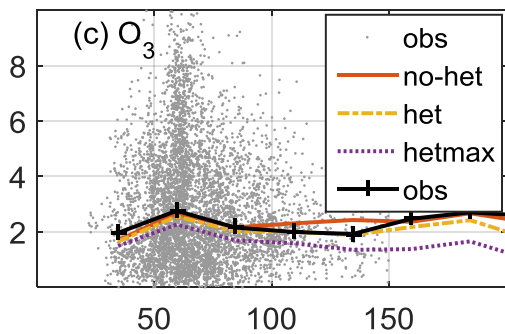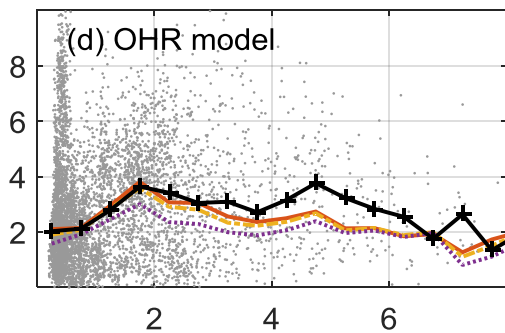

$\text{HO}_2$  (pptv)

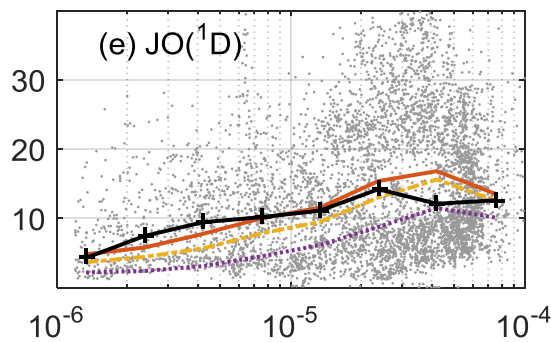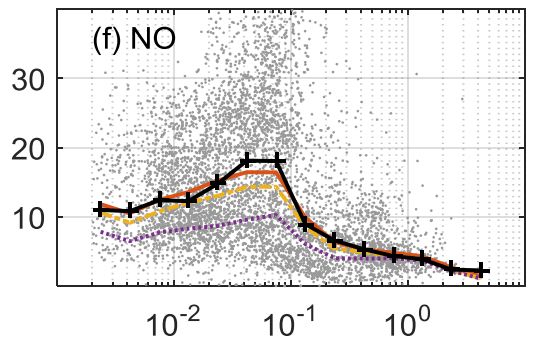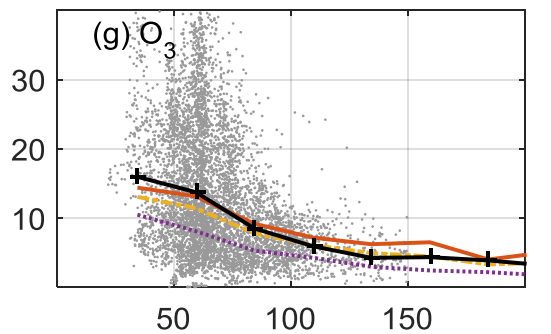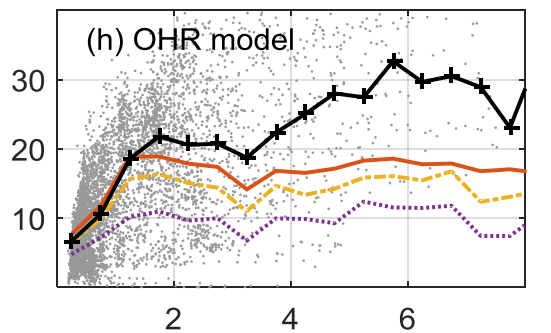

**Figure 4.** Measured and modeled OH (left) and HO<sub>2</sub> (right) as a function of controlling variables: JO(<sup>1</sup>D) in s<sup>-1</sup>, NO in ppbv, O<sub>3</sub> in ppbv, and modeled OH reactivity in s<sup>-1</sup>. On the left, OH is in units of 10<sup>6</sup> cm<sup>-3</sup>; on the right, HO<sub>2</sub> is in units of pptv.

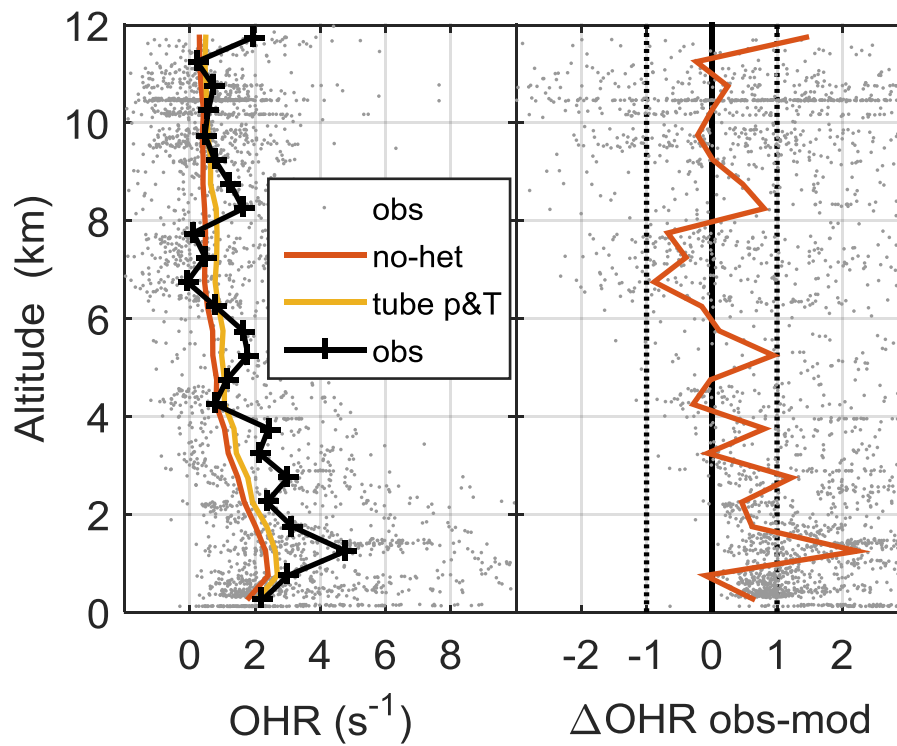

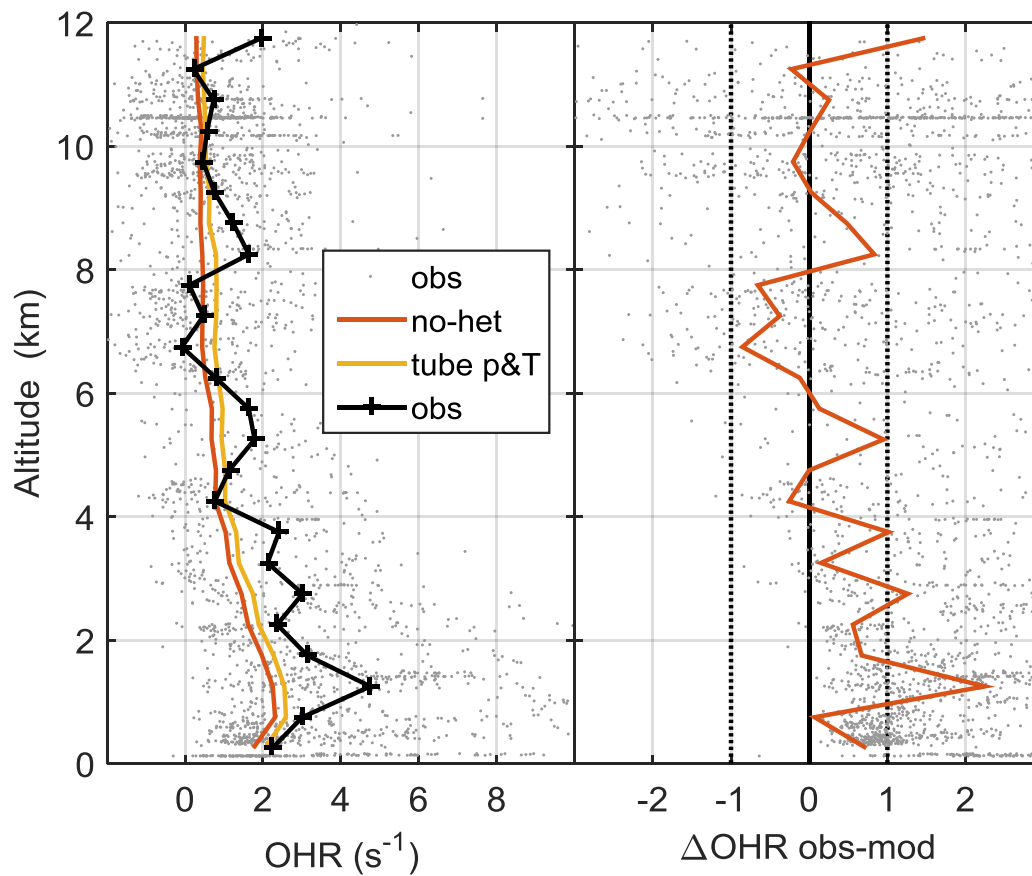

**Figure 5.** Median observed and model-calculated OH reactivity (left) and the difference between observed and modeled OH reactivity (right). The model-calculated OH reactivity was determined for ambient conditions (no-het) and for the OHR flow tube pressure and temperature (tube p&T). See text for explanation. Dotted vertical black lines on right are approximate indicators of measurement-model agreement.

5

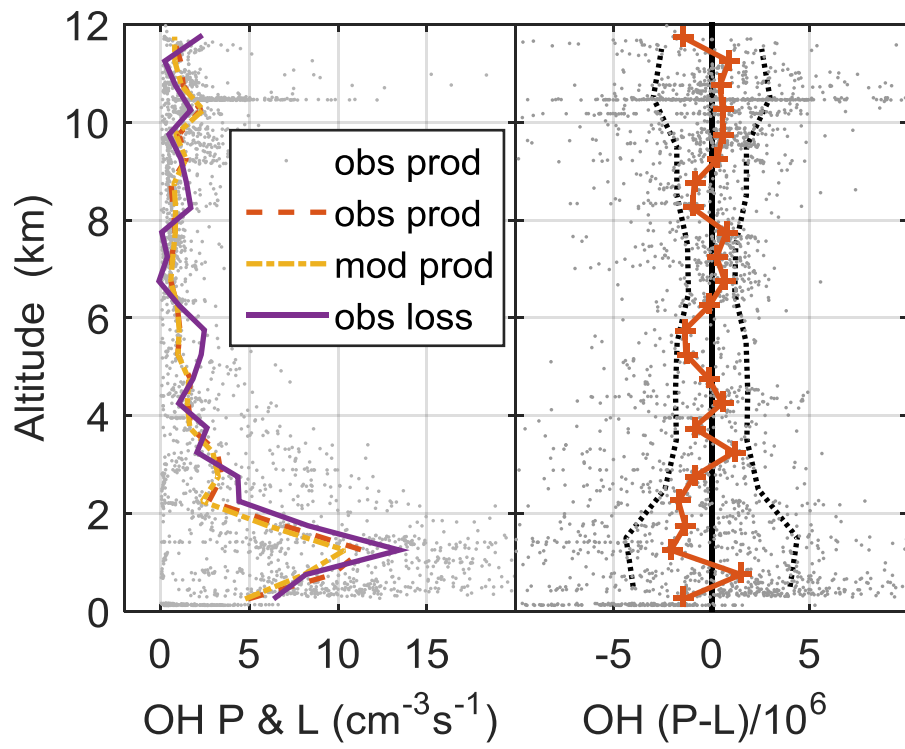

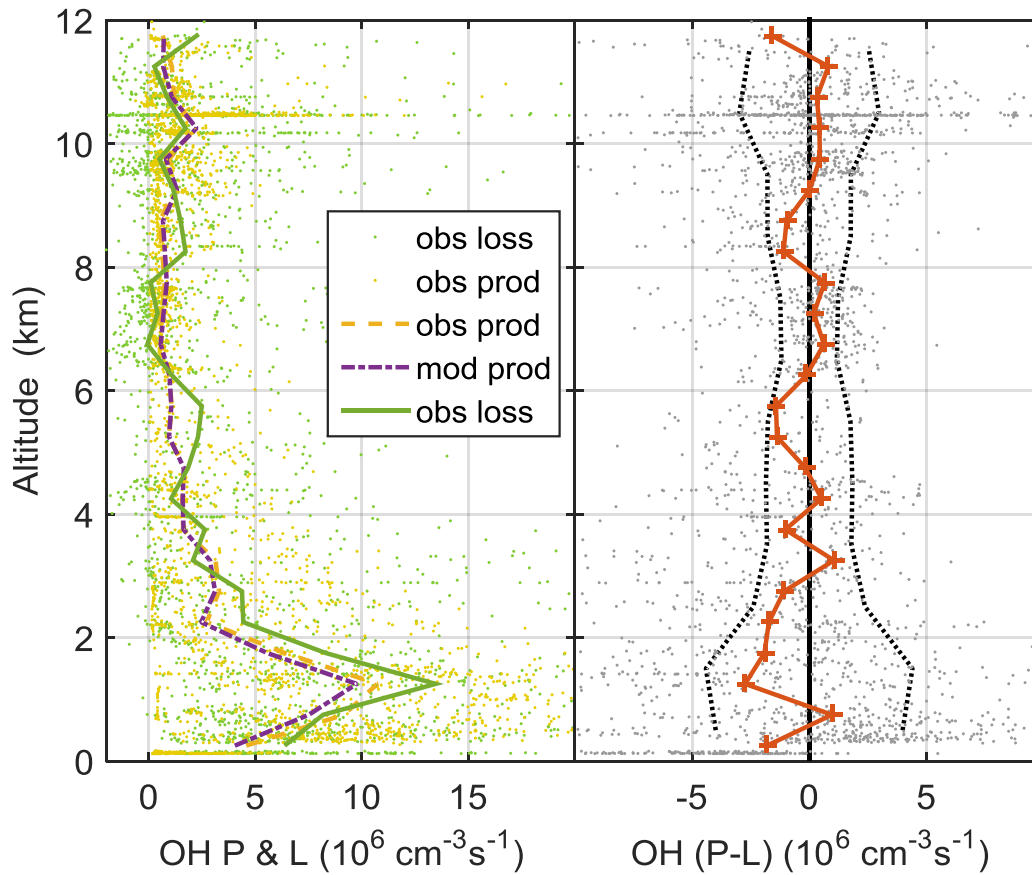

**Figure 6.** OH production and loss (left) and difference between measured OH production and measured OH loss,  $\text{cm}^{-3}\text{s}^{-1}$  divided by  $10^6$  (right). Modeled OH production and loss are equal. Dots are individual one-minute calculations of OH production using observed atmospheric constituents and photolysis frequencies. Dotted vertical black lines on right are indicators of OH production and loss agreement at the  $1\sigma$  confidence and were determined by a propagation of error analysis.

5

10

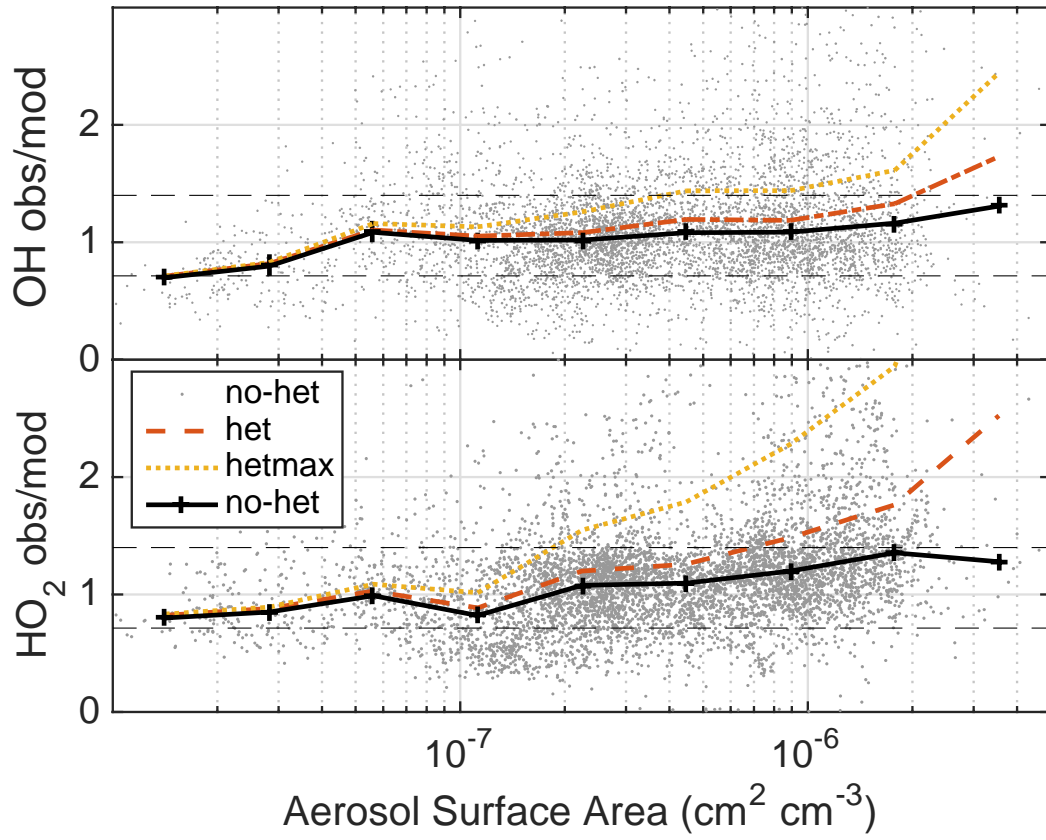

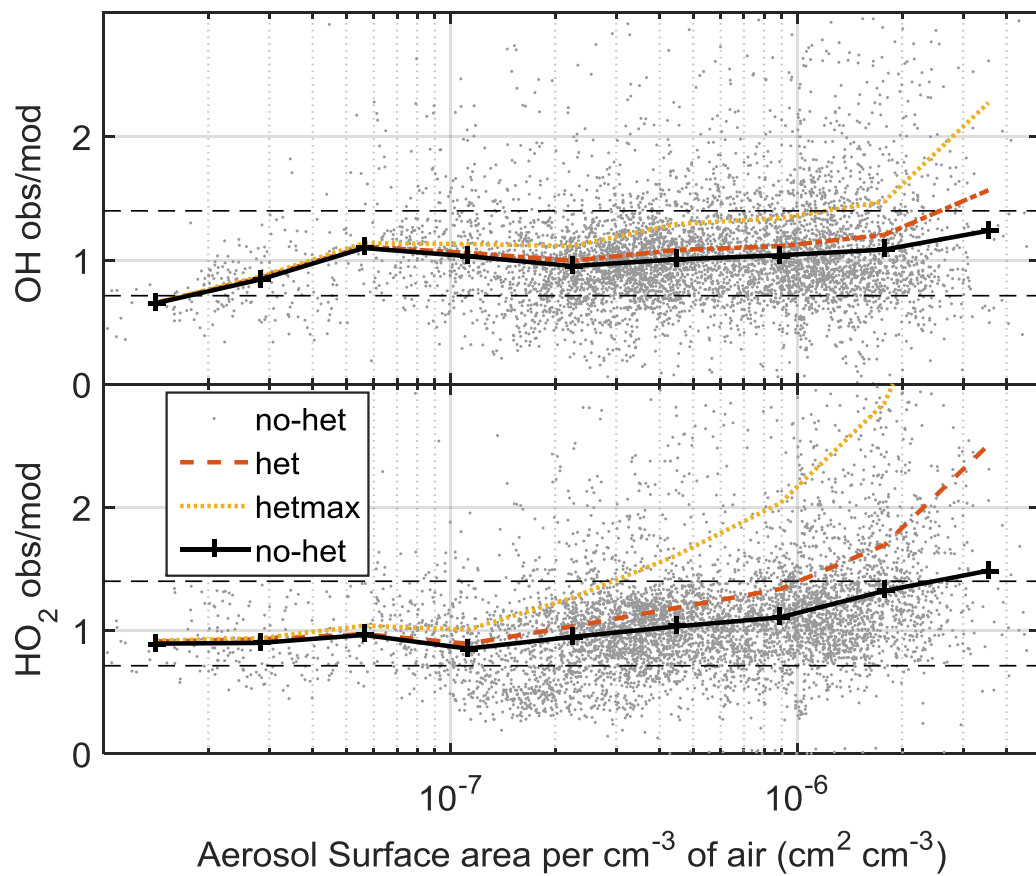

**Figure 7.** Median observed-to-modeled OH (top) and HO<sub>2</sub> (bottom) versus aerosol surface area concentration  
area per cm<sup>3</sup> of air. Dotted horizontal black lines are indicators of OH production and loss agreement.



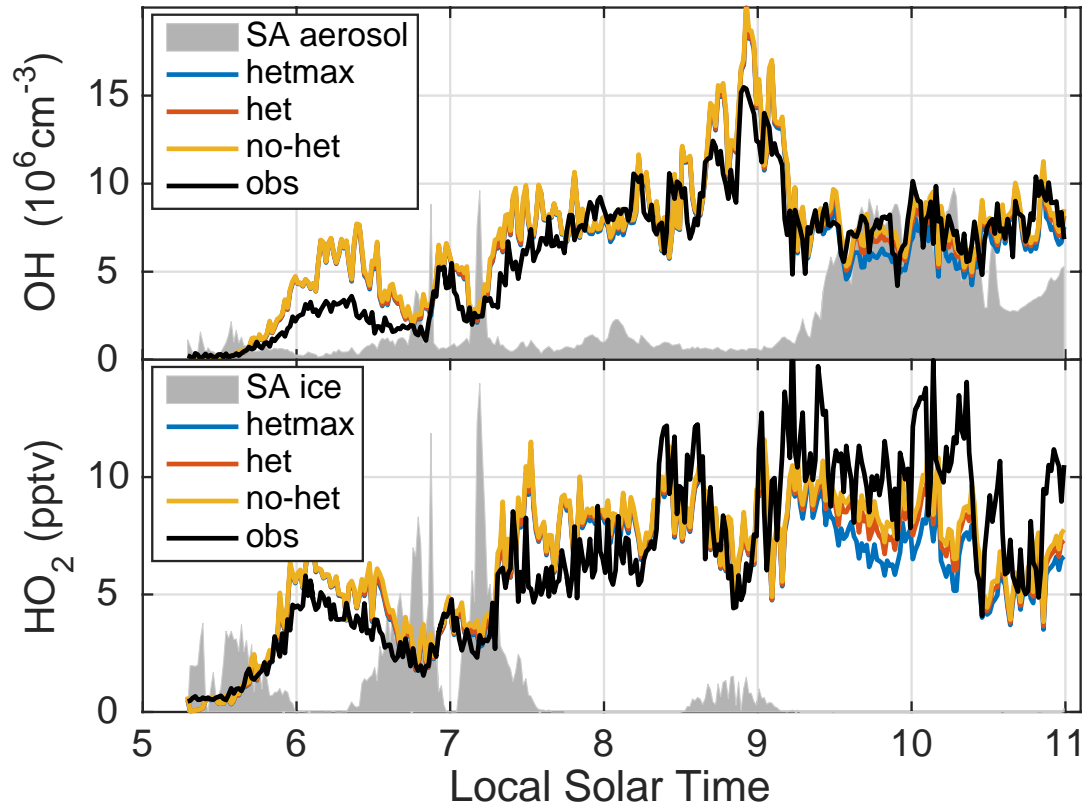

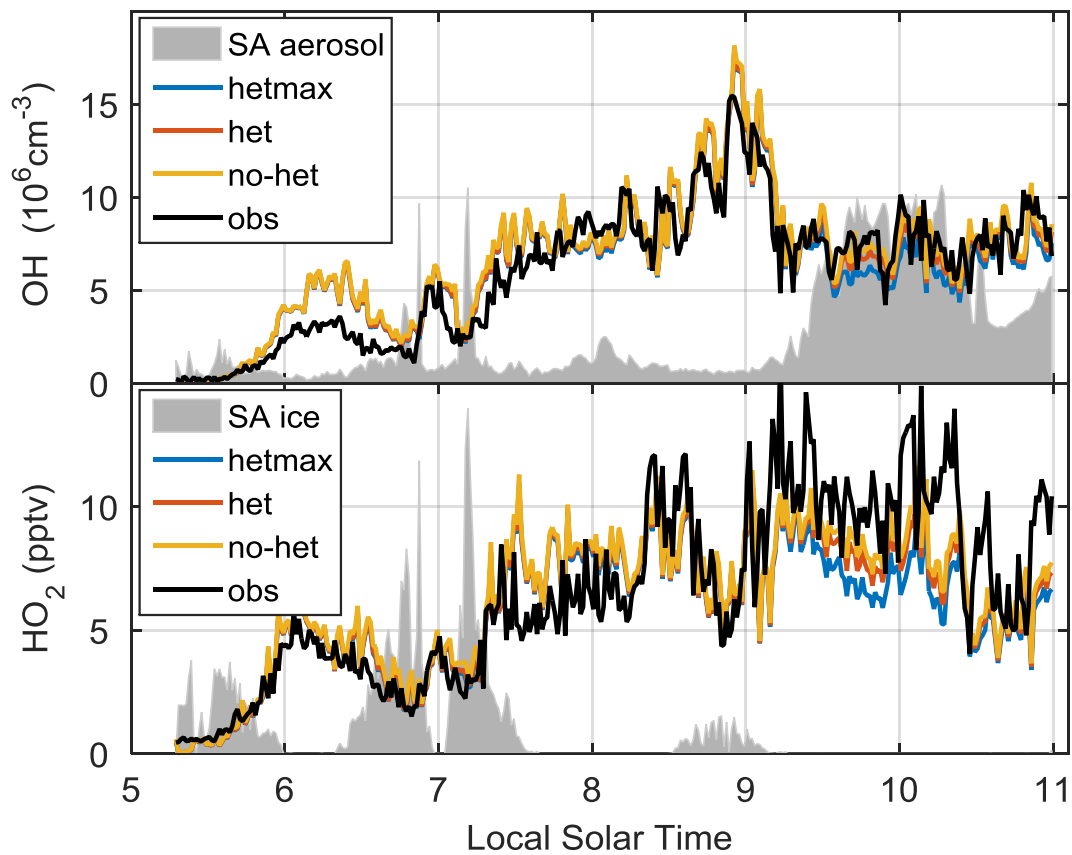

**Figure 8.** Evolution of OH (top) and HO<sub>2</sub> (bottom) downwind of a MCS. The het and hetmax models are essentially identical to the no-het model for this flight except in heavy aerosol from 9 am to 11 am. The gray shading is scaled aerosol surface area (top panel) and is scaled ice surface area (bottom panel).

5

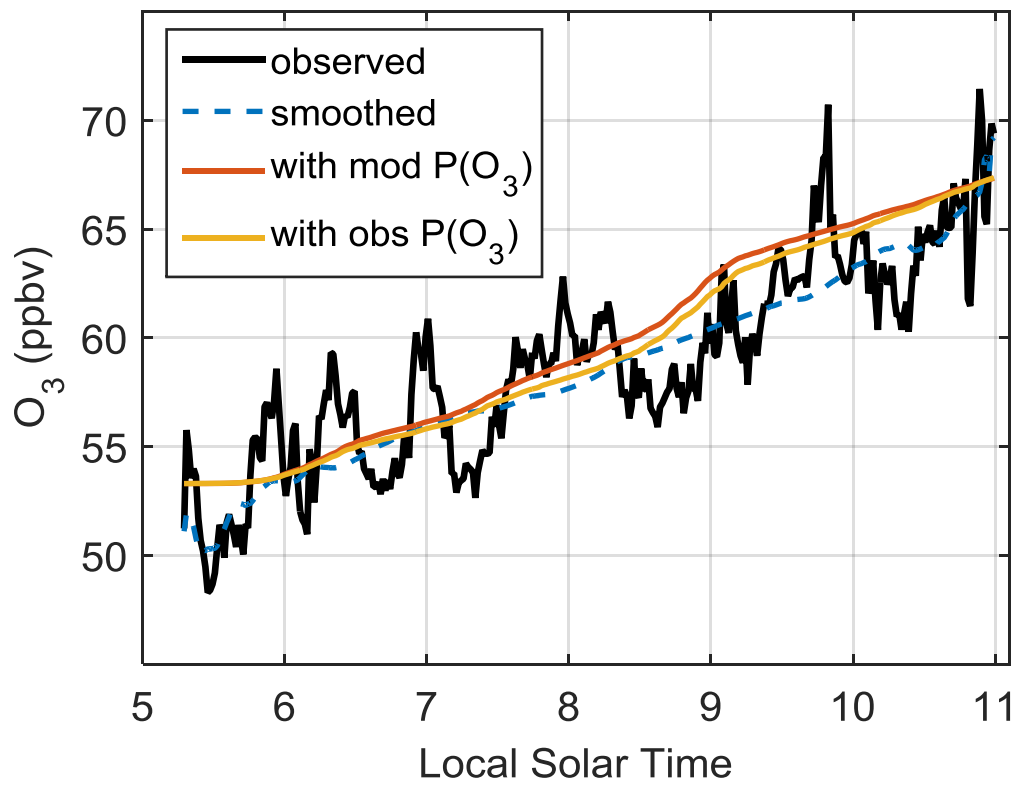

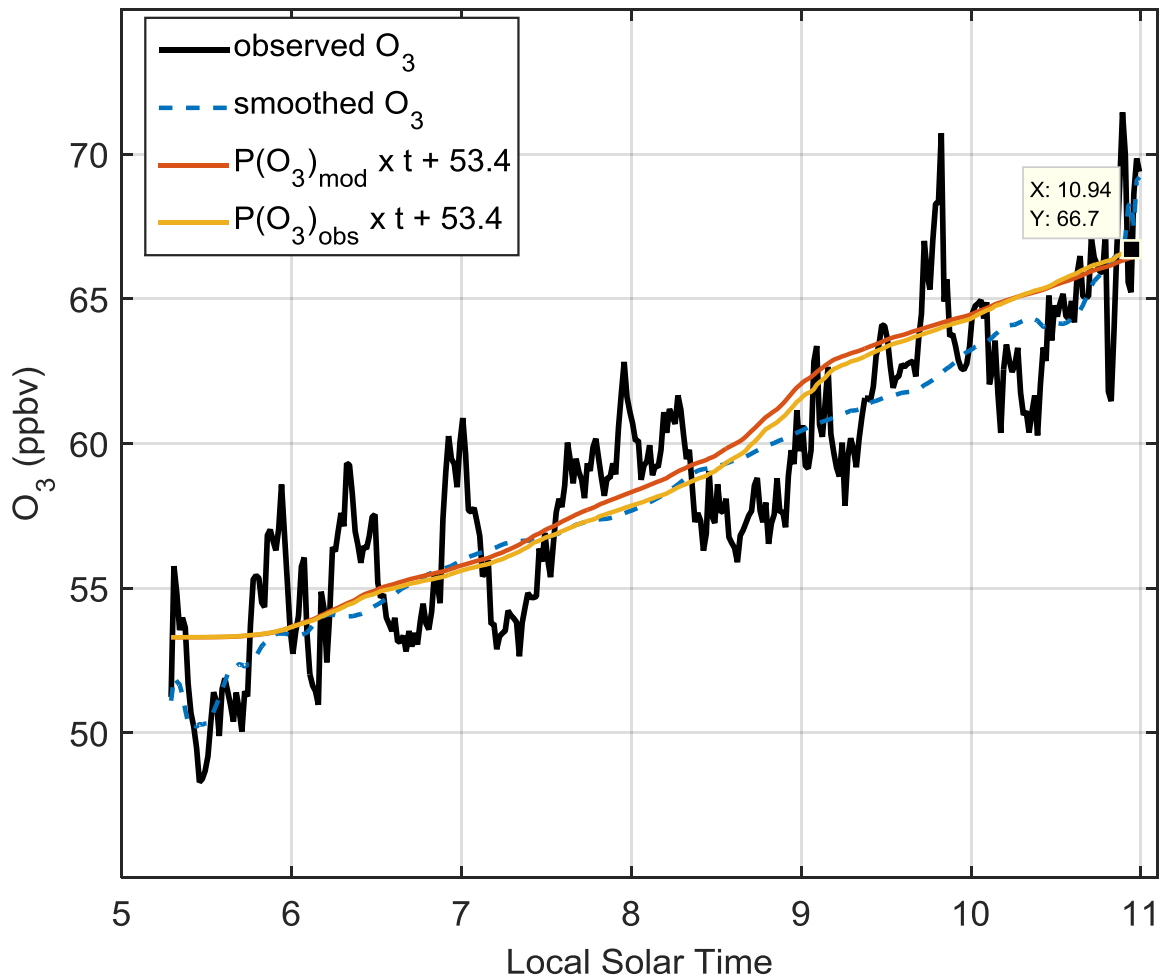

**Figure 9.** The  $O_3$  trend in MCS outflow. Observed  $O_3$  - one-minute data (black line) and smoothed data (dashed blue line, 180-min filter) - show variability along the legs set perpendicular to the air flow and also show the  $O_3$  trend with time. The calculated  $O_3$  uses the accumulated calculated  $O_3$  production rates ( $P(O_3) \times \text{time}$ ) for observed (yellow) and modeled  $HO_2$  (red) and adds those values to an initial value of 53.4 ppbv to show the calculated  $O_3$  trend.

5

**Table 1.** Scatter plot statistics for OH and HO<sub>2</sub>

| case   | molecule        | units                            | slope  | intercept | R <sup>2</sup> | ratio      |
|--------|-----------------|----------------------------------|--------|-----------|----------------|------------|
| no-het | OH              | 10 <sup>6</sup> cm <sup>-3</sup> | 1.004  | 0.012     | 0.854          | 1.038      |
|        | HO <sub>2</sub> | pptv                             | 1.007  | 0.3642    | 0.687<br>5     | 1.104      |
| het    | OH              | 10 <sup>6</sup> cm <sup>-3</sup> | 1.0742 | 0.023     | 0.876          | 1.116      |
|        | HO <sub>2</sub> | pptv                             | 1.1422 | 0.5127    | 0.629          | 1.283<br>3 |
| hetmax | OH              | 10 <sup>6</sup> cm <sup>-3</sup> | 1.2430 | 0.034     | 0.854          | 1.293<br>6 |
|        | HO <sub>2</sub> | pptv                             | 1.5366 | 0.6842    | 0.505<br>5     | 1.837      |

## Supplementary Material

Table 1. Measured chemical species

| Chemical species                                                                                                                                                                                                                                                                                                                                                                                                                | Accuracy (2 $\sigma$ confidence)                        | Time resolution                    | reference                                     |
|---------------------------------------------------------------------------------------------------------------------------------------------------------------------------------------------------------------------------------------------------------------------------------------------------------------------------------------------------------------------------------------------------------------------------------|---------------------------------------------------------|------------------------------------|-----------------------------------------------|
| OH, HO <sub>2</sub>                                                                                                                                                                                                                                                                                                                                                                                                             | ±32%                                                    | 20 s                               | Faloona et al., 2004                          |
| NO;<br>NO <sub>2</sub> ;<br>O <sub>3</sub>                                                                                                                                                                                                                                                                                                                                                                                      | 0.01 ppbv +<br>4%; 0.02 ppbv<br>+ 6%; 0.04<br>ppbv + 3% | 1 s                                | Ryerson et al., 2000;<br>Pollack et al., 2011 |
| HCHO                                                                                                                                                                                                                                                                                                                                                                                                                            | ±10% + ±10<br>pptv offset                               | 1 s                                | Cazorla et al., 2015.                         |
| NO <sub>2</sub> ;<br>PNs;<br>MPN, ANs                                                                                                                                                                                                                                                                                                                                                                                           | ±5%;<br>±10%;<br>±15%;                                  | 15 s                               | Thornton et al., 2000;<br>Day et al., 2002    |
| CO, CH <sub>4</sub> , N <sub>2</sub> O                                                                                                                                                                                                                                                                                                                                                                                          | ±2% or 2 ppbv                                           | 1 s                                | Sachse et al., 1991                           |
| SO <sub>2</sub> ;<br>HCl;<br>PAN, PPN, HNO <sub>4</sub>                                                                                                                                                                                                                                                                                                                                                                         | ±15%<br>±20%<br>±30%                                    | 10 s                               | Huey, 2007                                    |
| H <sub>2</sub> O <sub>2</sub> , CH <sub>3</sub> OOH, ISOPOOH,<br>Glycolaldehyde, IEPOX, C <sub>5</sub> H <sub>10</sub> O <sub>3</sub> , C <sub>5</sub> H <sub>8</sub> O <sub>3</sub> ,<br>Ethanal_Nitrate, Hydroxyacetone, Hydrogen<br>cyanide, HNO <sub>3</sub> , Isoprene nitrate,<br>Peroxyacetic Acid, Propanone Nitrate                                                                                                    | ±(40-80)%<br>±50% + (25-<br>100) pptv offset            | 10 s                               | Crouse et al., 2006                           |
| Isoprene, Monotepenes, MVK/MACR,<br>Acetone/Propanal, Methanol, Acetaldehyde,<br>Acetonitrile                                                                                                                                                                                                                                                                                                                                   | ±10%                                                    | 2 s                                | Mielke, et al., 2008                          |
| Ethyne, Ethane, Ethane, Propene, Propane, i-<br>Butane, n-Butane, i-Pentane, n-Pentane, n-<br>Hexane, n-Heptane, 2,3-Dimethylbutane, 2-<br>Methylhexane, 3-Methylhexane,<br>Cyclohexane, Benzene, Toluene, m,p-Xylene,<br>o-Xylene, Ethylbenzene, cis-2-Butene, trans-<br>2-Butene, C8-Aromatics/Benzaldehyde,<br>DMS, Methyl nitrate, Isoprene, $\alpha$ -Pinene, $\beta$ -<br>Pinene, several halogen-containing<br>compounds | ±10%                                                    | Variable,<br>seconds to<br>minutes | Colman et al., 2001                           |
| H <sub>2</sub> O                                                                                                                                                                                                                                                                                                                                                                                                                | ±5% or 1 ppmv                                           | 1 s                                | Vay et al., 1998                              |

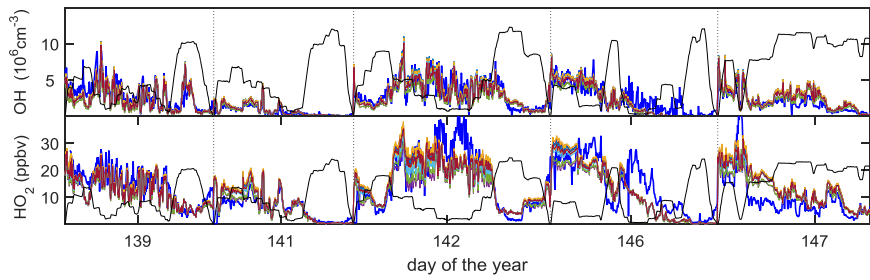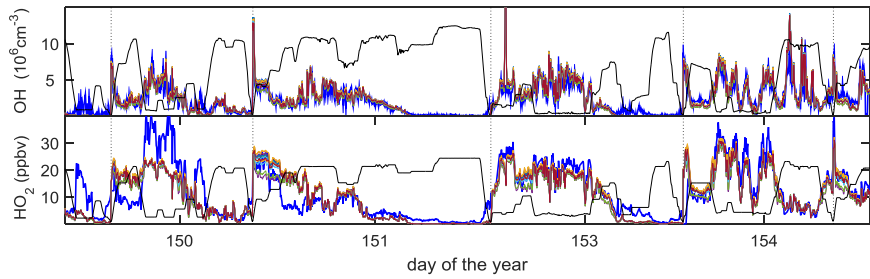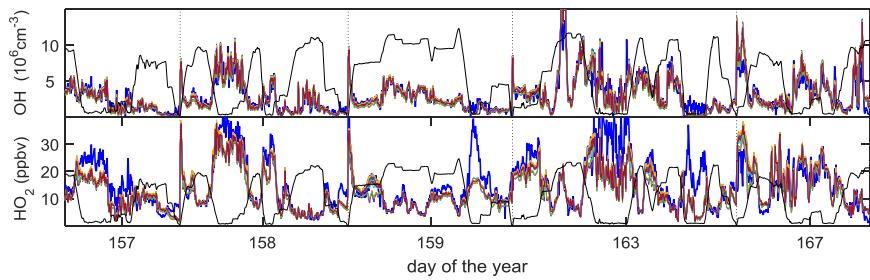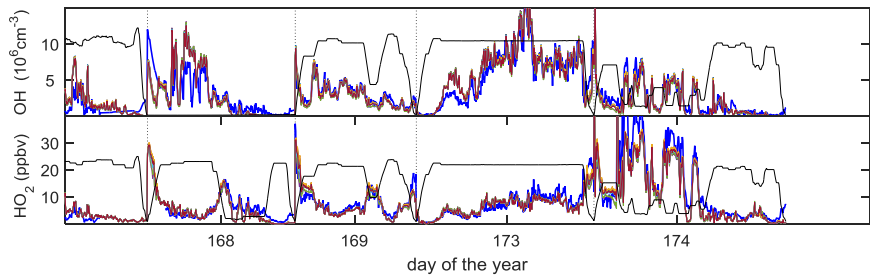

**Figure S1.** Comparison of observed and modeled OH and HO<sub>2</sub> as a function of time. Blue lines are observations. Models with different integration times, dilution times, and with and without added RO<sub>2</sub>+OH chemistry are plotted

**Formatted:** Font: (Default) Times New Roman, 10 pt, Bold

**Formatted:** Font: (Default) Times New Roman, 10 pt

**Formatted:** Font: (Default) Times New Roman, 10 pt, Bold

**Formatted:** Font: (Default) Times New Roman, 10 pt

in different colors to show the range of modeled OH and HO<sub>2</sub> values for these different model scenarios. Scaled altitude (black line) and separation between flights (vertical dotted lines) are added for clarify. If the observed blue line cannot be seen, then observed and modeled values agree.

Formatted: Font: (Default) Times New Roman, 10 pt

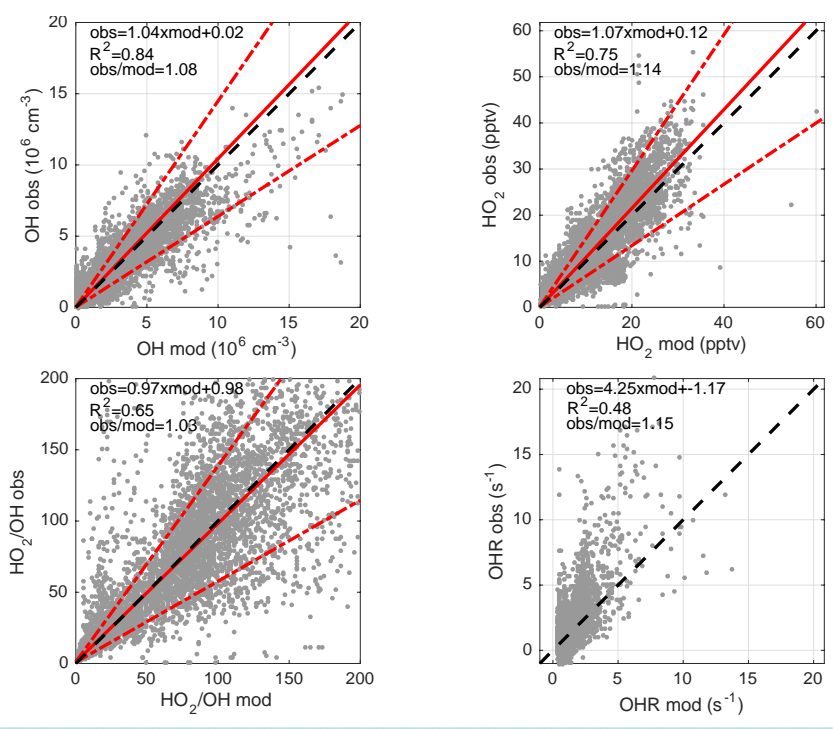

Formatted: Font: (Default) Times New Roman, 10 pt

Formatted: Centered



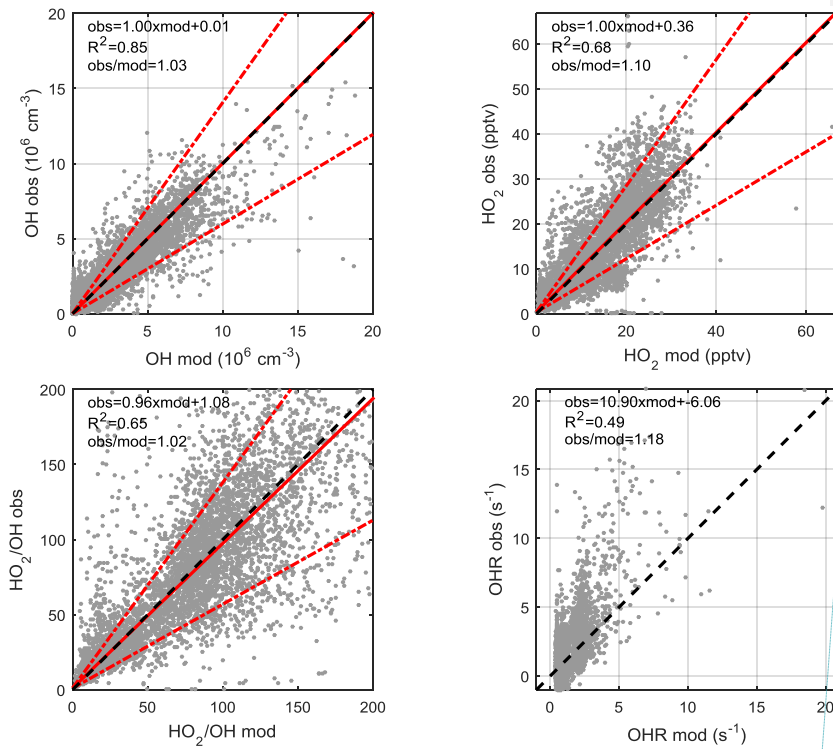

**Formatted:** Font: (Default) Times New Roman, 10 pt, Bold

**Figure S21.** Observations versus the no-het model. Scatter plots of observed versus modeled OH (upper right),  $\text{HO}_2$  (upper left),  $\text{HO}_2/\text{OH}$  (lower left), and OH reactivity (lower right). Gray points are one-minute averages. Dashed red lines are factors of 1/1.4 and 1.4 times the fitted line (solid red).

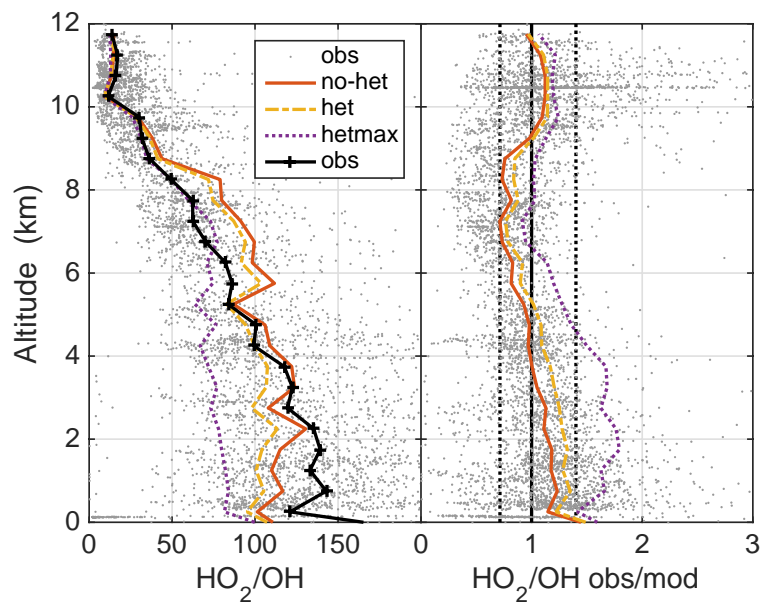

Formatted: Font: (Default) Times New Roman, 10 pt

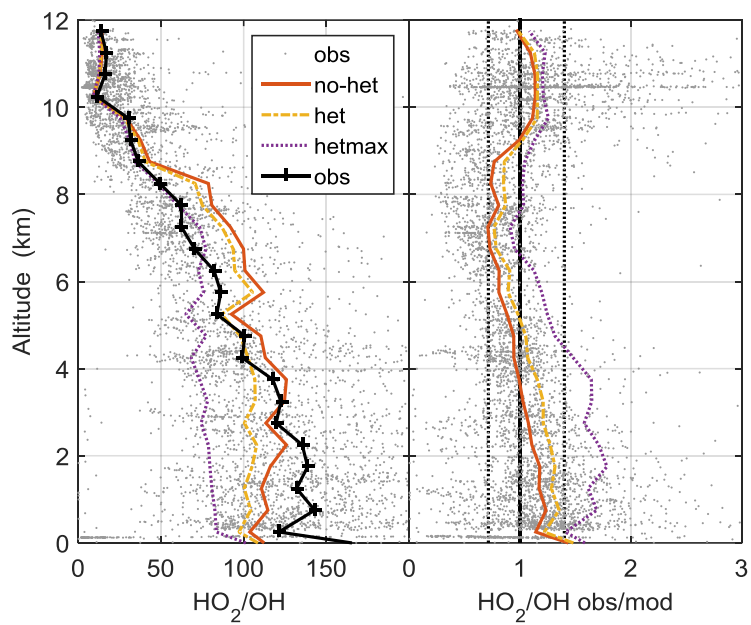

**Figure S32.** Median measured and modeled HO<sub>2</sub>/OH as a function of altitude (left); median ratio of observed-to-modeled HO<sub>2</sub>/OH for the three models as a function of altitude. Gray points are individual 1-minute HO<sub>2</sub>/OH observations and ratios of observed-to-no-heterogeneous modeled HO<sub>2</sub>/OH. Dotted vertical red lines on right are approximate indicators of observation and model agreement.

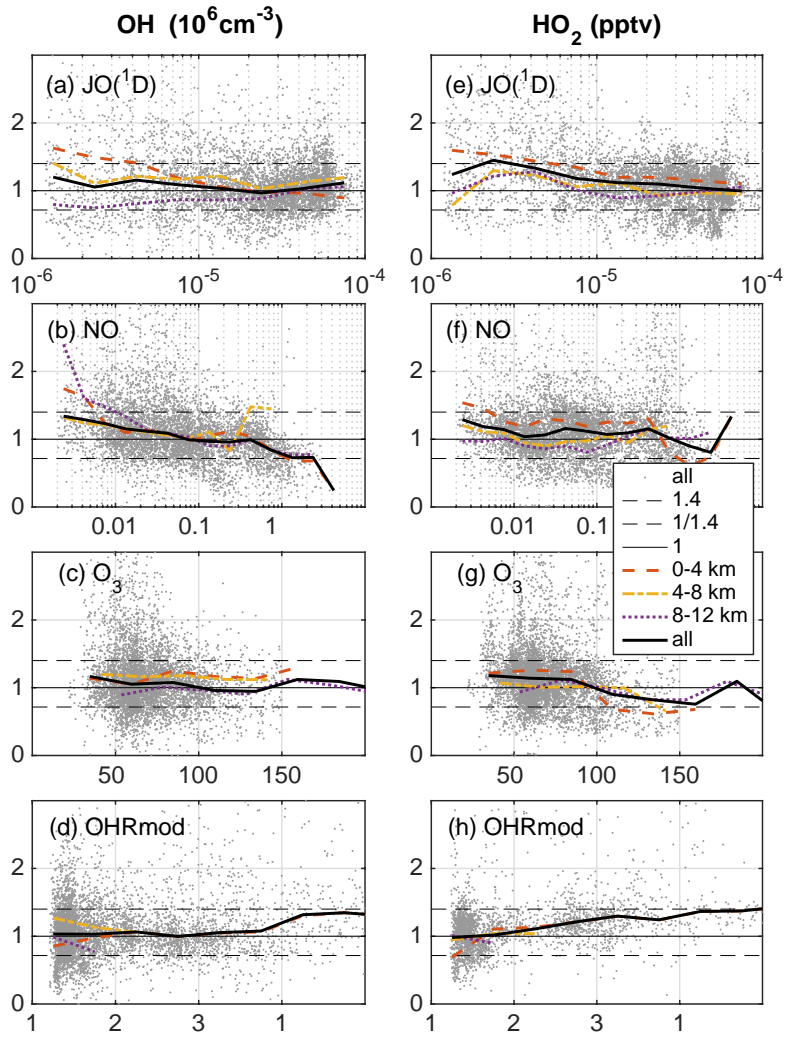

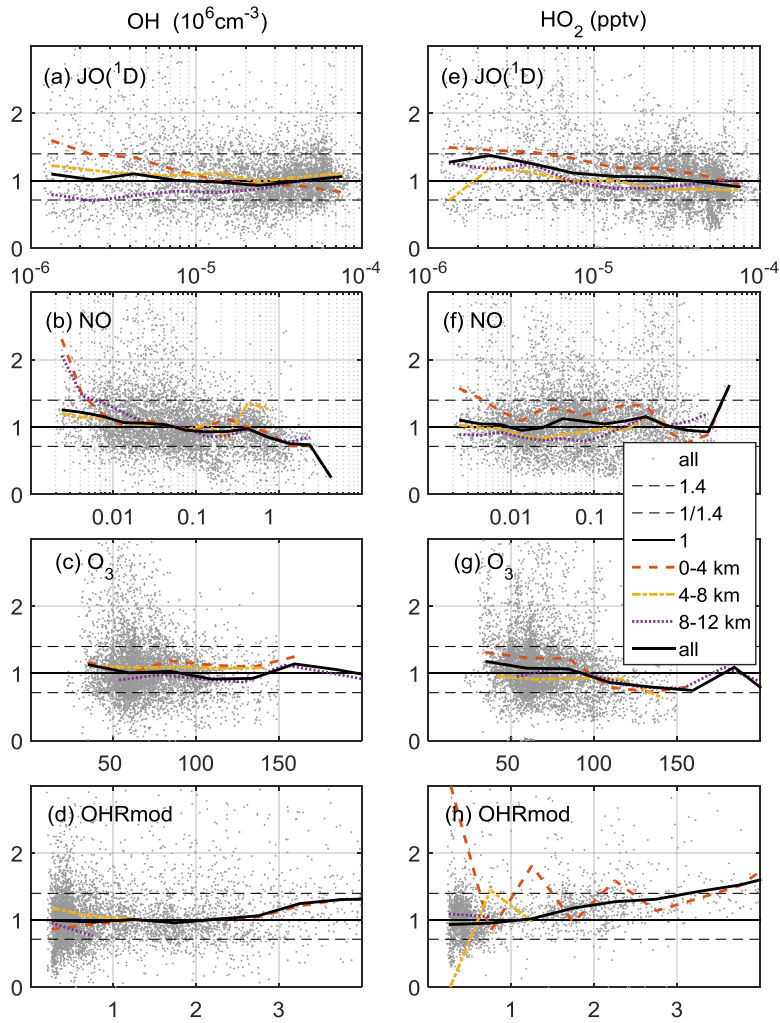

**Figure S43.** Measured/modeled OH (left) and  $\text{HO}_2$  (right) as a function of controlling variables:  $\text{JO}(^1\text{D})$  in  $\text{s}^{-1}$ , NO in ppbv,  $\text{O}_3$  in ppbv, and modeled OH reactivity in  $\text{s}^{-1}$ . Ratios are averaged for three different altitude bands and all the data. Dotted horizontal lines are approximate indicators of observation and model agreement.

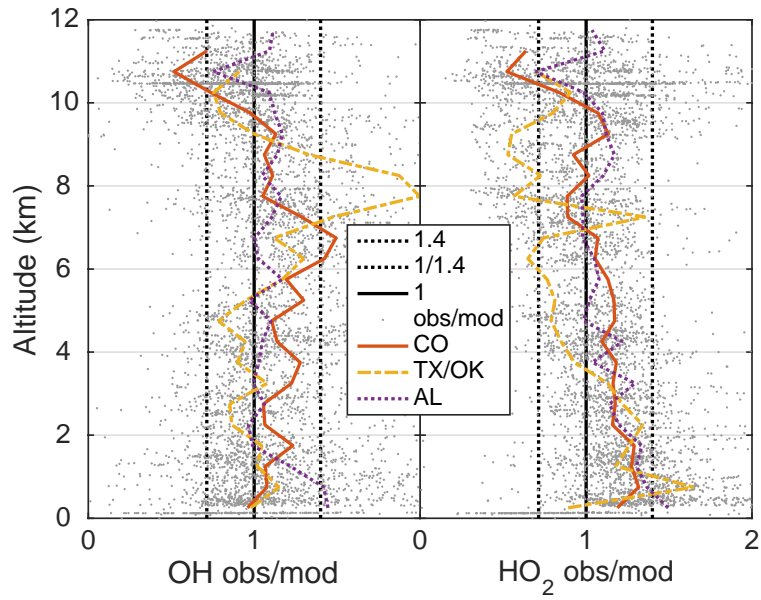

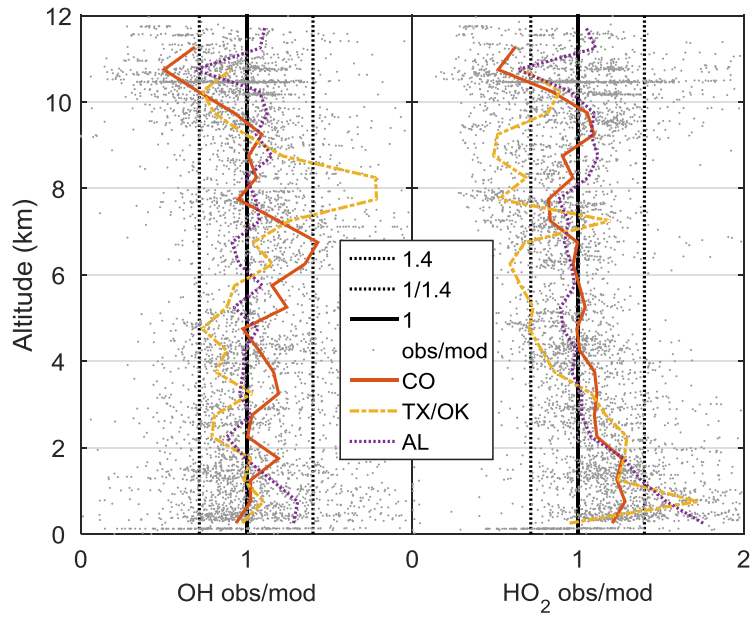

**Figure S54.** Median observed-to-modeled OH (left) and HO<sub>2</sub> (right) with the no-het model, as a function of altitude for the three regions: Colorado, Texas/Oklahoma, and Alabama. Dotted vertical black lines on right are approximate indicators of observation and model agreement.

**Formatted:** Font: (Default) Times New Roman, 10 pt, Bold

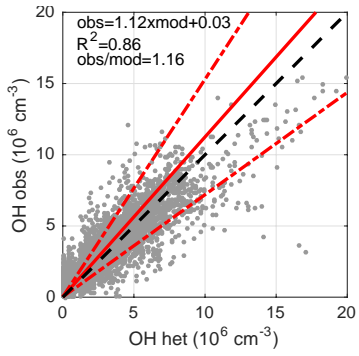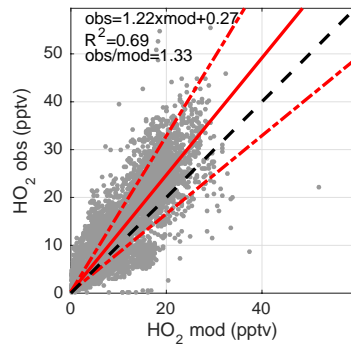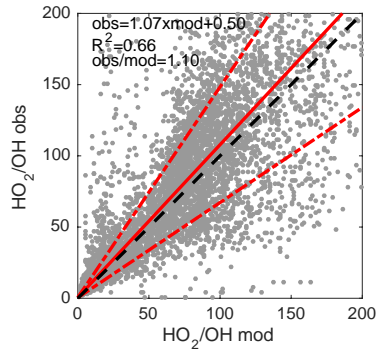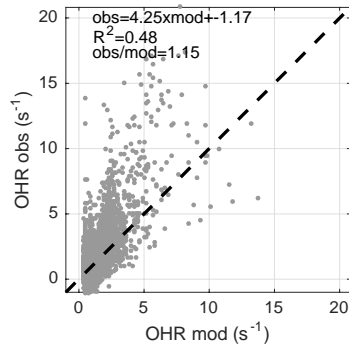

Formatted: Font: (Default) Times New Roman, 10 pt



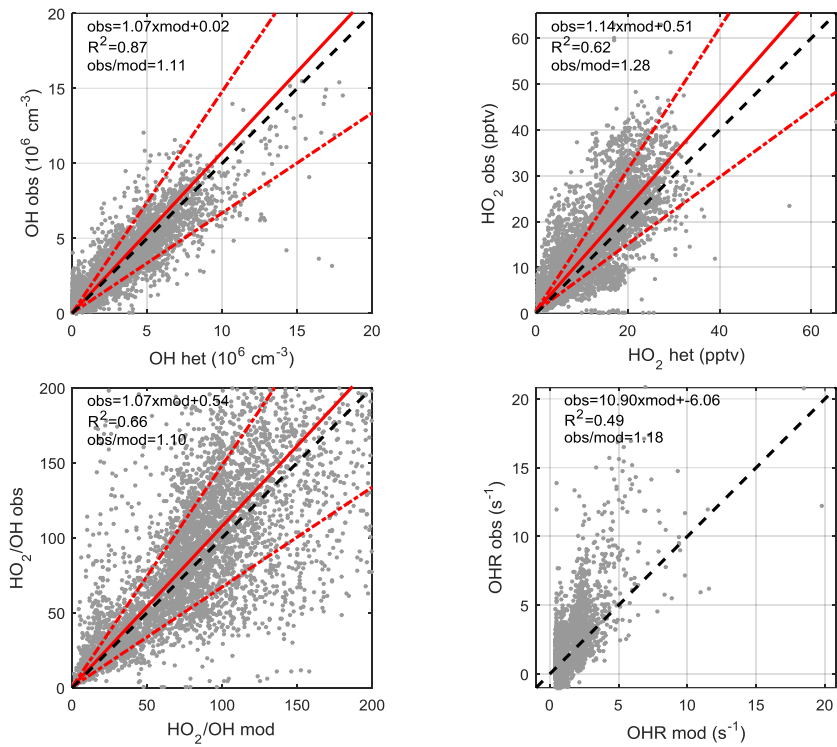

**Figure S65.** Observations versus the het model. Scatter plots of observed versus modeled OH (upper right), HO<sub>2</sub> (upper left), HO<sub>2</sub>/OH (lower left), and OH reactivity (lower right). Gray points are one-minute averages. Dashed red lines are factors of 1/1.4 and 1.4 times the fitted line (solid red).

Formatted: Font: (Default) Times New Roman, 10 pt

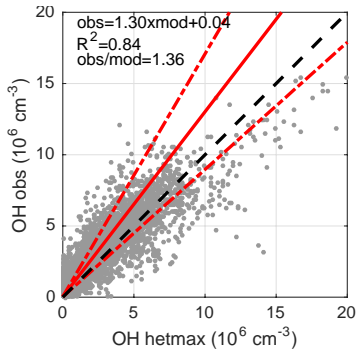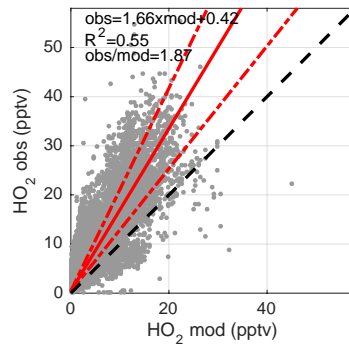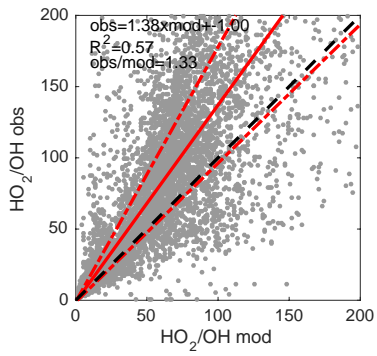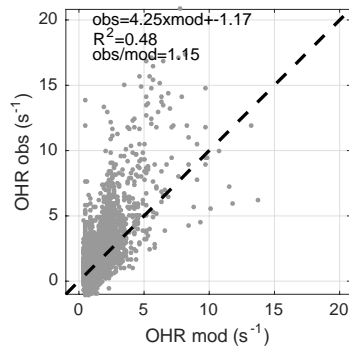

Formatted: Font: (Default) Times New Roman, 10 pt

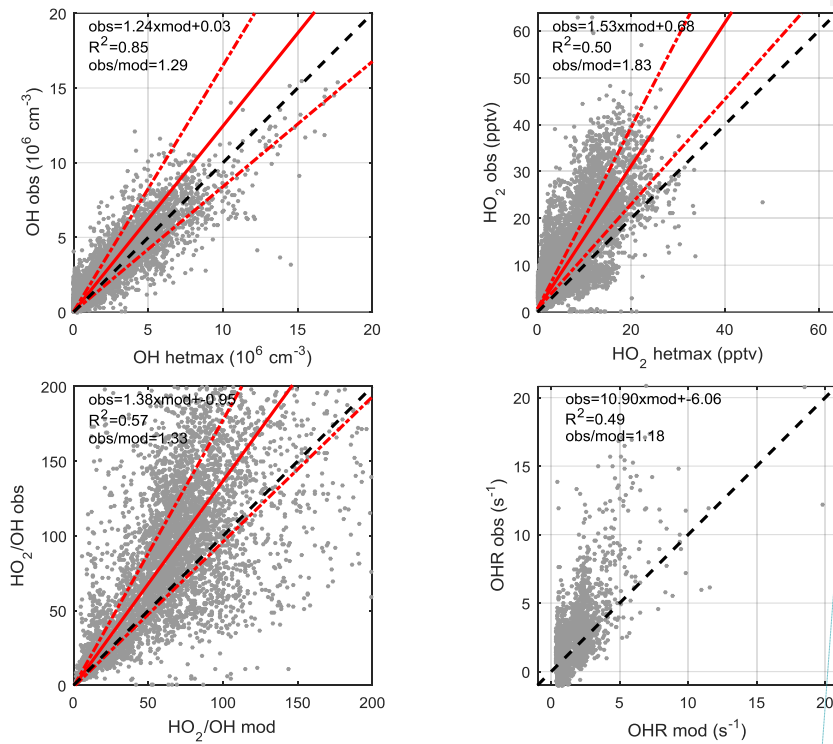

**Formatted:** Font: (Default) Times New Roman, 10 pt, Bold

**Figure S76.** Observations versus the hetmax model. Scatter plots of observed versus modeled OH (upper right), HO<sub>2</sub> (upper left), HO<sub>2</sub>/OH (lower left), and OH reactivity (lower right). Gray points are one-minute averages. Dashed red lines are factors of 1/1.4 and 1.4 times the fitted line (solid red).

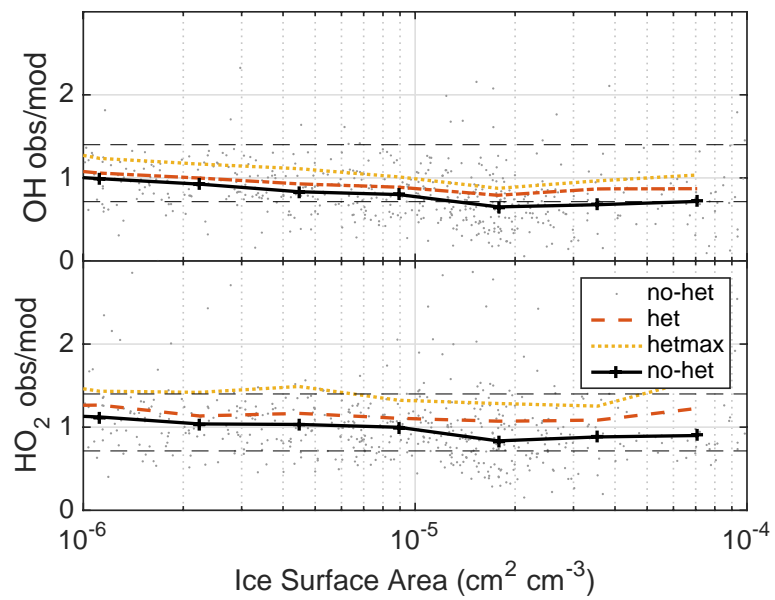

Formatted: Font: (Default) Times New Roman, 10 pt

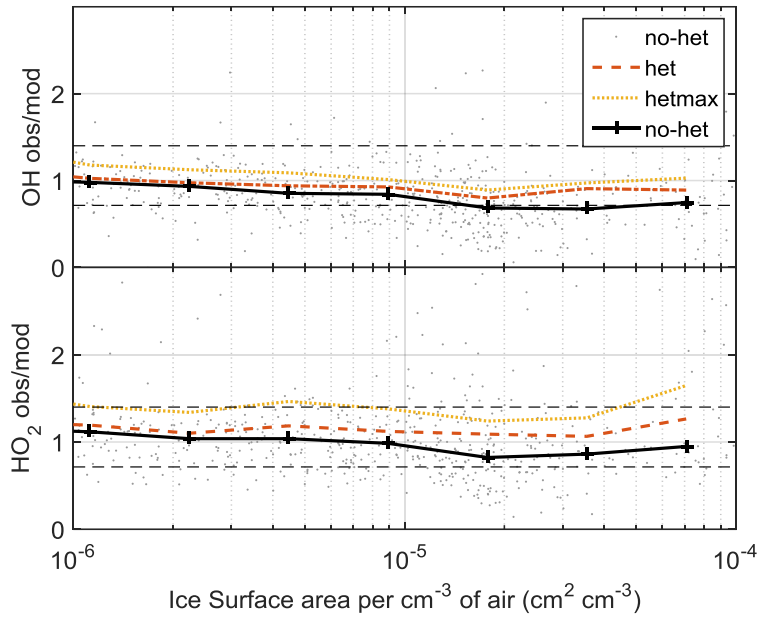

**Figure S87.** Median observed-to-modeled OH (top) and HO<sub>2</sub> (bottom) versus ice surface area concentration. Dotted horizontal black lines are indicators of observation and model agreement.

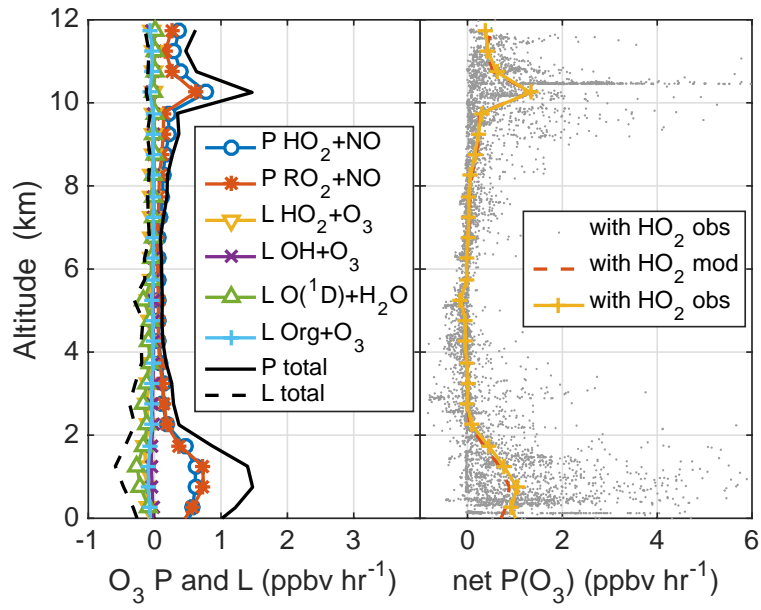

Formatted: Font: (Default) Times New Roman, 10 pt

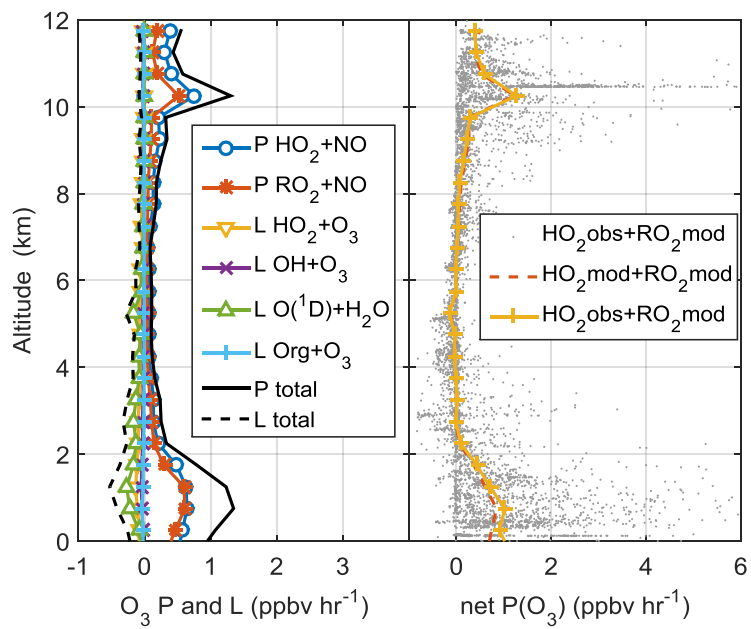

**Figure S98.** Calculated ozone production ( $\text{P}(\text{O}_3)$ ). Rates of production (P) and loss (L) are on the left. Individual rates are shown, along with the total. Net  $\text{P}(\text{O}_3)$  is shown on the right.

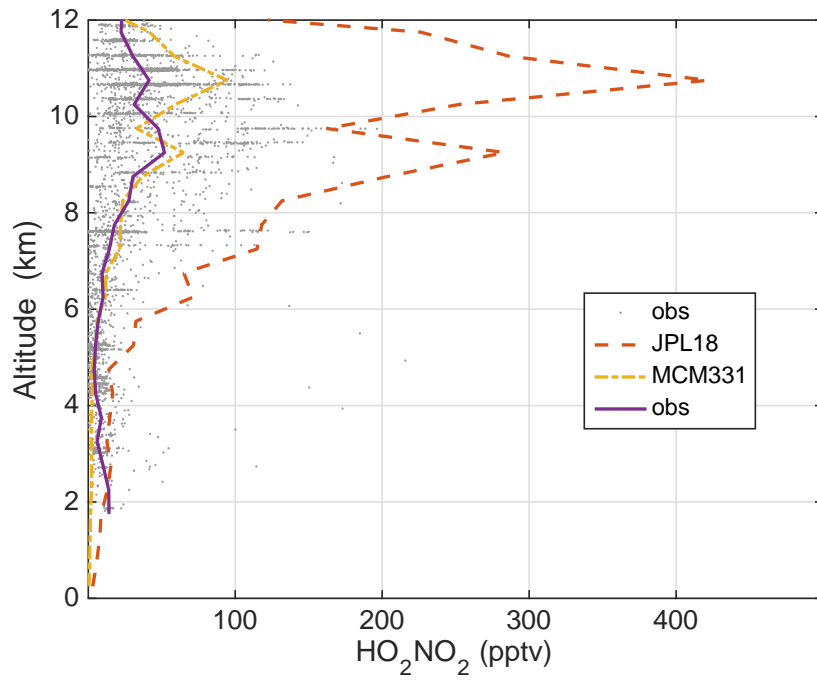



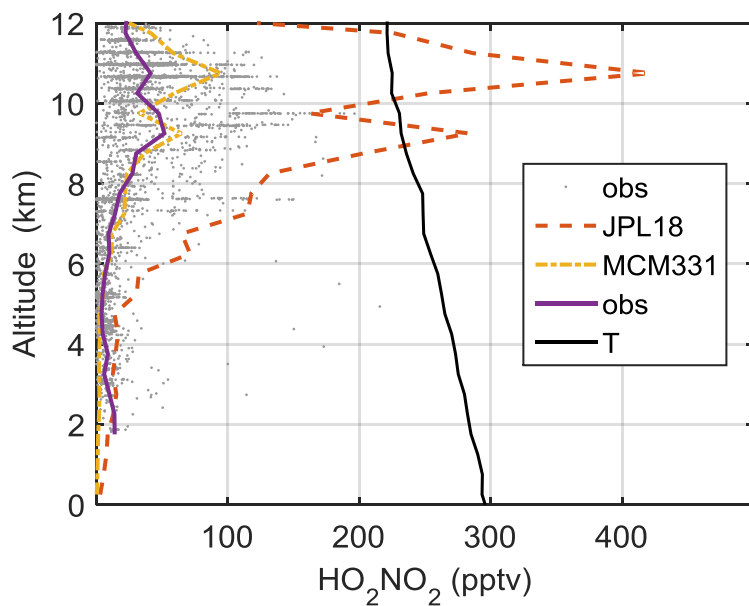

**Figure S109.**  $\text{HO}_2\text{NO}_2$  and temperature as a function of altitude. MCM331 was run the reaction rate coefficient for  $\text{HO}_2+\text{NO}_2+\text{M}$  from JPL18 (Burkholder et al., 2015) and from MCMv3.1.1 (Saunders et al., 2003).

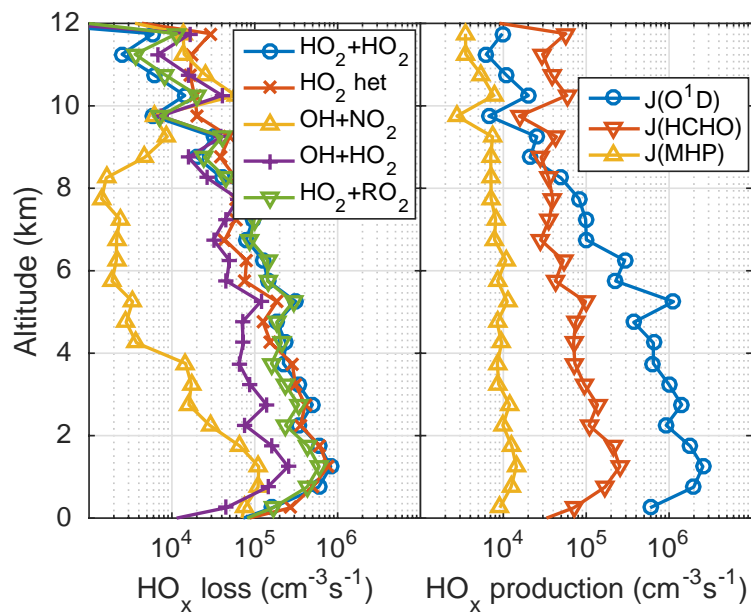

Formatted: Font: (Default) Times New Roman, 10 pt

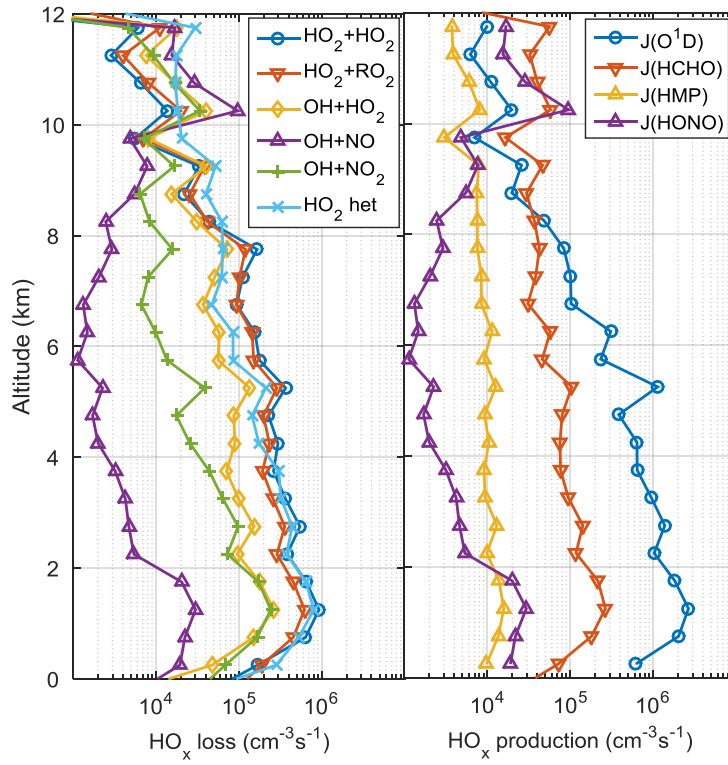

**Figure S110.** Median modeled HO<sub>x</sub> loss (right) and production (left) as a function of altitude. MHP is ~~Methyl-methyl~~ hydroperoxide. The HO<sub>2</sub> heterogeneous loss was calculated with the het model.

**Table S1.** Scatter plot statistics for OH and HO<sub>2</sub> with ~10% of total one-minute data (661/6817)

| case   | molecule        | units                            | slope  | intercept | R <sup>2</sup> | ratio      |
|--------|-----------------|----------------------------------|--------|-----------|----------------|------------|
| no-het | OH              | 10 <sup>6</sup> cm <sup>-3</sup> | 0.9693 | 0.4920    | 0.786          | 1.038      |
|        | HO <sub>2</sub> | pptv                             | 1.4301 | 0.2450    | 0.808          | 1.104      |
| het    | OH              | 10 <sup>6</sup> cm <sup>-3</sup> | 1.059  | 0.210     | 0.843          | 1.116      |
|        | HO <sub>2</sub> | pptv                             | 1.3319 | 0.4975    | 0.749          | 1.332<br>8 |
| hetmax | OH              | 10 <sup>6</sup> cm <sup>-3</sup> | 1.3328 | 0.224     | 0.810          | 1.362<br>9 |

|  |                 |      |               |               |                          |              |
|--|-----------------|------|---------------|---------------|--------------------------|--------------|
|  | HO <sub>2</sub> | pptv | <u>1.9068</u> | <u>0.2783</u> | <u>0.625</u><br><u>9</u> | <u>1.837</u> |
|--|-----------------|------|---------------|---------------|--------------------------|--------------|
